# Supplementary material
Source: publisher figshare collection journal article supplement (https://acs.figshare.com/ndownloader/files/4488340)
Supplement: Supplementary file 1 [file 4488340]

# Synthesis of (-)-Uniflorine A, (+)-Casuarine, (+)-Australine, (-)-3-*Epi*-australine and (-)-3,7-*Diepi*-australine

Thunwadee Ritthiwigrom, Anthony C. Willis and Stephen G. Pyne

## SUPPORTING INFORMATION

**General Methods and Experimental Procedures** SI-1 - SI-39

### TABLES

**TABLE 1** PHYSICAL AND SPECTRAL DATA FOR (-)-UNIFLORINE A AND **1** ..... SI-9

**TABLE 2** PHYSICAL AND SPECTRAL DATA FOR (+)-CASUARINE AND **2**..... SI-19

**TABLE 3** PHYSICAL AND SPECTRAL DATA FOR (+)-AUSTRALINE AND **3**..... SI-26 –SI-27

**TABLE 4** PHYSICAL AND SPECTRAL DATA FOR (-)-3-*EPI*-AUSTRALINE AND **4**..... SI-36

**Table 5** Physical and spectral Data for (+)-1,2-*Diepi*-alexine•HCl salt [ent-**36**] and  
**36**•HCl salt [3,7-*diepi*-australine•HCl salt].....SI-39

**COPIES OF <sup>1</sup>H and <sup>13</sup>C NMR SPECTRA** SI-40-SI-89

**NOTE:** COPIES OF THE <sup>1</sup>H AND <sup>13</sup>C NMR SPECTRA FOR THE ENANTIOMERS OF  
COMPOUNDS **5** AND **6** CAN BE FOUND IN THE SUPPORTING INFORMATION OF OUR  
EARLIER PUBLICATION.<sup>1</sup>

NMR SPECTRA OF (-)-UNIFLORINE A **1** .....SI-48 – SI-50

NMR SPECTRA OF (+)-CASUARINE **2** .....SI-59 – SI-61

NMR SPECTRA (INCLUDING COSY, HSQC AND HMBC) OF (+)-AUSTRALINE **3** .....SI-67 – SI-72

NMR SPECTRA OF (-)-3-*EPI*-AUSTRALINE **4**.....SI-82 – SI-84

NMR SPECTRA OF (+)-3,7-*DIEPI*-AUSTRALINE **36** .....SI-86 – SI-88

**ORTEP PLOT** for compound **21** SI-90

1. Davis, A. S.; Pyne, S. G.; Skelton, B. W.; White, A. H., *J. Org. Chem.* **2004**, 69, 3139-3143.

**General methods:** All IR spectra were run as neat samples. NMR assignments were made on the basis of COSY, DEPT, HSQC and sometimes HMBC experiments. In the case of epoxide compounds NMR assignments are given based on the numbering system of the parent pyrrolidine, pyrrolizine or indolizine and not the systematic numbering. Petrol refers to the hydrocarbon fraction of bp 40-60 °C

**(6E)-5-(Allylamino)-5,6,7-trideoxy-7-phenyl-D-gluco-hept-6-enitol (5).**

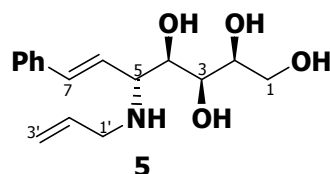

To a mixture of L-xylose (11.00 g, 73.3 mmol) and *trans*-2-phenylvinyl boronic acid (11.93 g, 80.6 mmol) was added absolute ethanol (110 mL) and allylamine (6.05 mL, 80.6 mmol). The reaction mixture was stirred at rt for 3 days, followed by the evaporation of all volatiles *in vacuo*. The residue was dissolved in 1 M HCl (*ca* 20 mL), applied to a column of DOWEX resin (H<sup>+</sup> form, 150 mL) and washed with distilled H<sub>2</sub>O (2 L). The product was eluted with 7 M NH<sub>4</sub>OH (2 L) and 14 M NH<sub>4</sub>OH (2 L). The fractions containing the product were combined and concentrated to a brown foamy solid (19.78 g, 92%).

$[\alpha]_D^{25} +27$  (*c* 0.06, MeOH).

This compound had the same R<sub>f</sub>, MS, IR and NMR spectroscopic data as reported earlier.<sup>1</sup>

1. Davis, A. S.; Pyne, S. G.; Skelton, B. W.; White, A. H., *J. Org. Chem.* **2004**, *69*, 3139-3143.

***tert*-Butyl allyl((2S,3S,4R,5R,E)-1,2,3,4-tetrahydroxy-7-phenylpent-6-en-5-yl)carbamate (6).**

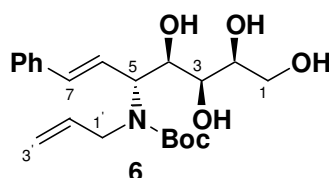

To a solution of **5** (21.49 g, 73.34 mmol) in anhydrous MeOH (300 mL) was added anhydrous Et<sub>3</sub>N (20.45 mL, 14.67 mmol) and di-*tert*-butyl-dicarbonate (47.44 g, 16.87 mmol). The reaction mixture was stirred at rt under an atmosphere of N<sub>2</sub> for 3

days, followed by the evaporation of all volatiles *in vacuo*. The residue was purified by flash column chromatography (FCC) (80:20 to 100:0 EtOAc/petrol and then 20:80 MeOH/EtOAc) to give a brown oil (23.1 g, 80%).

$[\alpha]_D^{25} -50$  (*c* 3.0, CHCl<sub>3</sub>).

This compound had the same R<sub>f</sub>, MS, IR and NMR spectroscopic data as reported earlier.<sup>1</sup>

1. Davis, A. S.; Pyne, S. G.; Skelton, B. W.; White, A. H., *J. Org. Chem.* **2004**, *69*, 3139-3143.

***tert*-Butyl allyl((2*S*,3*S*,4*R*,5*R*,*E*)-1,2-*O*-(1-methylethylidene)-3,4-dihydroxy-7-phenylpent-6-en-5-yl)carbamate (7).**

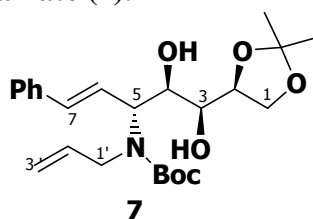

To a solution of **6** (4.957 g, 12.61 mmol) in anhydrous acetone (70 mL) was added 2,2-dimethoxypropane (1.86 mL, 15.13 mmol) and pyridinium *p*-toluenesulfonate (0.317 g, 1.261 mmol). The reaction mixture was stirred under an atmosphere of N<sub>2</sub> for 22 h, followed by the evaporation of all volatiles *in vacuo* to give a brown oil. The residue was purified by FCC (30:70 to 50:50 EtOAc/petrol) to give **7** (3.485 g, 64%) as a white solid, foamy solid. A small amount of another regioisomeric compound was also isolated (1.759 g, 19%). This compound was not further characterized.

$[\alpha]_D^{22} -36$  (*c* 6.5, CHCl<sub>3</sub>). [Lit.<sup>2</sup> for (+)-**7**;  $[\alpha]_D^{23} +41$  (*c* 10.1, CHCl<sub>3</sub>)].

This compound had the same R<sub>f</sub>, MS, IR and NMR spectroscopic data as reported for (+)-**7**.<sup>2</sup>

2. Ritthiwigrom, T.; Pyne, S. G., *Org. Lett.* **2008**, *10*, 2769-2771.

**(2R)-tert-Butyl 2-((1R,2S,3S)-1,2,3,4-tetrahydroxybutyl-3,4-O-(1-methylethylidene))-2,5-dihydro-1H-pyrrole-1-carboxylate (8).**

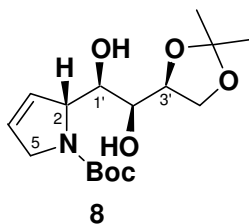

To a solution of **7** (5.553 g, 12.82 mmol) in anhydrous CH<sub>2</sub>Cl<sub>2</sub> (260 mL) was added Grubbs' I catalyst (1.055 g, 1.282 mmol). The reaction mixture was stirred and heated at reflux for 18 h under an atmosphere of N<sub>2</sub> followed by the removal of all volatiles *in vacuo*. The residue was purified by FCC (50:50 to 70:30 EtOAc/petrol) to give **8** as a dark brown viscous oil (4.09 g, 97%).

$[\alpha]_D^{21} +125$  (*c* 4.5, CHCl<sub>3</sub>). [Lit.<sup>2</sup> for (-)-**8**;  $[\alpha]_D^{22} -37$  (*c* 5.75, CHCl<sub>3</sub>)].

This compound had the same R<sub>f</sub>, MS, IR and NMR spectroscopic data as reported for (-)-**8**.<sup>2</sup>

2. Ritthiwigrom, T.; Pyne, S. G., *Org. Lett.* **2008**, *10*, 2769-2771.

**(2R,3S,4R)-tert-Butyl 2-((1R,2S,3S)-1,2,3,4-tetrahydroxybutyl-3,4-O-(1-methylethylidene))-3,4-dihydroxypyrrolidine-1-carboxylate (9).**

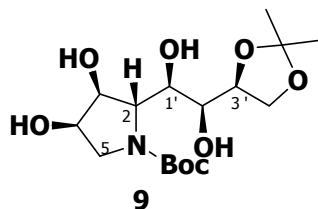

To a solution of **8** (4.00 g, 12.16 mmol) in acetone (60 mL) and water (60 mL) was added potassium osmate-dihydrate (223.7 mg, 0.608 mmol) and 4-morpholine-*N*-oxide (2.987 g, 25.53 mmol). The reaction mixture was stirred for 18 h at rt and evaporated to give a dark brown oil which was purified by FCC (100% EtOAc to 4:96 MeOH/EtOAc) to give **9** as a brown foamy solid (3.174 g, 72%).

$[\alpha]_D^{22} +32$  (*c* 4.9, CHCl<sub>3</sub>). [Lit.<sup>2</sup> for (-)-**9**;  $[\alpha]_D^{22} -32$  (*c* 4.8, CHCl<sub>3</sub>)].

This compound had the same R<sub>f</sub>, MS, IR and NMR spectroscopic data as reported for (-)-**9**.<sup>2</sup>

2. Ritthiwigrom, T.; Pyne, S. G., *Org. Lett.* **2008**, *10*, 2769-2771.



**(2R,3S,4R)-tert-Butyl 3,4-bis(benzyloxy)-2-((1R,2S,3S)- 1,2-bis(benzyloxy)-3,4-O-(1-methylethylidene))- 3,4-dihydroxybutylpyrrolidine-1-carboxylate (10).**

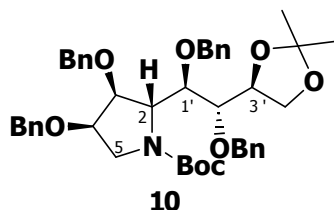

To a solution of **9** (3.077 g, 8.477 mmol) in dry THF (85 mL) was added *n*-Bu<sub>4</sub>NI (313.1 mg, 0.848 mmol) and BnBr (8.07 mL, 67.81 mmol) follow by NaH (2.441 g, 50.86 mmol, 50 % in mineral oil) at 0 °C. After H<sub>2</sub> evolution had ceased (15 min) the reaction mixture was stirred at rt for 24 h. MeOH (50 mL) was then added followed by evaporation of all volatiles *in vacuo*. The residue was dissolved in EtOAc and filtered through celite, followed by further washings of the solids with EtOAc. The solvent was evaporated and the residue was purified by FCC (10:90 to 15:85 EtOAc/petrol) to give **10** as a pale yellow syrup (5.89 g, 96%).

$[\alpha]_D^{23}$  -50 (*c* 5.4, CHCl<sub>3</sub>). [Lit.<sup>2</sup> for (+)-**10**;  $[\alpha]_D^{23}$  +45 (*c* 4.26, CHCl<sub>3</sub>).

This compound had the same R<sub>f</sub>, MS, IR and NMR spectroscopic data as reported for (+)-**10**.<sup>2</sup>

2. Ritthiwigrom, T.; Pyne, S. G., *Org. Lett.* **2008**, *10*, 2769-2771.

**1-[(2S,3R,4R)-3,4-Bisbenzyloxy-2-pyrrolidinyl]-(1R,2S,3R)-1,2-dibenzyloxy-butane-3,4-diol (11).**

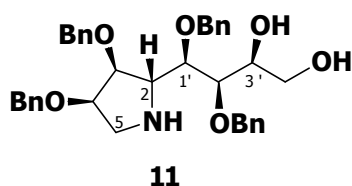

To a solution of **10** (5.78 g, 7.994 mmol) in MeOH (200 mL) was added dropwise conc. HCl solution (40 mL) and the mixture was stirred at rt for 18 h. The reaction mixture was basified at 0 °C with aqueous NH<sub>3</sub> solution (28%). The mixture was extracted with EtOAc, dried (Na<sub>2</sub>CO<sub>3</sub>), evaporated and purified by FCC (100% EtOAc to 93:5:2 EtOAc/MeOH/NH<sub>3</sub>) to give **11** (3.788 g, 81%) as a yellow viscous oil.

$[\alpha]_D^{22}$  -27 (*c* 3.7, CHCl<sub>3</sub>). [Lit.<sup>2</sup> for (+)-**11**;  $[\alpha]_D^{21}$  +35 (*c* 1.45, CHCl<sub>3</sub>).

This compound had the same  $R_f$ , MS, IR and NMR spectroscopic data as reported for (+)-**11**.<sup>2</sup> It should be noted that the reported assignments for H-3 and H-4 and C-3 and C-4 should be interchanged.

2. Ritthiwigrom, T.; Pyne, S. G., *Org. Lett.* **2008**, *10*, 2769-2771.

**1-[(2*S*,3*R*,4*R*)-3,4-Bisibenzoyloxy-2-pyrrolidinyl]-(1*R*,2*S*,3*R*)-1,2-dibenzoyloxy-4-(*tert*-butyldimethylsilyloxy)-butan-3-ol (**12**).**

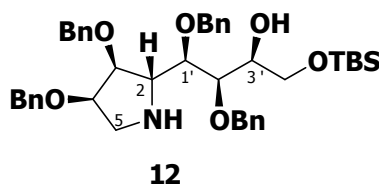

To a solution of the diol **11** (0.312 g, 0.535 mmol), imidazole (0.77 mg, 1.123 mmol) and 4-dimethylaminopyridine (6.5 mg, 0.053 mmol) in THF (6 mL) under  $N_2$  at rt was added TBSCl (0.97 g, 0.642 mmol). The reaction mixture was stirred for 2 days and the reaction was quenched by the addition of water. The solvent was removed under reduced pressure and the residue was extracted with  $CH_2Cl_2$ . The combined  $CH_2Cl_2$  extracts were combined and washed with brine, dried ( $Na_2CO_3$ ) and then evaporated to leave a residue which was chromatographed on silica gel by FCC (30:70 EtOAc/petrol to 2:98 MeOH /EtOAc). This gave **12** (0.316 g, 85%) as a yellow viscous oil.

$[\alpha]_D^{22} -17$  ( $c$  4.6,  $CHCl_3$ ). [Lit.<sup>2</sup> for (+)-**12**;  $[\alpha]_D^{22} +21$  ( $c$  0.7,  $CHCl_3$ ).

This compound had the same  $R_f$ , MS, IR and NMR spectroscopic data as reported for (+)-**12**.<sup>2</sup> It should be noted that the reported assignments for H-3 and H-4 and C-3 and C-4 should be interchanged.

2. Ritthiwigrom, T.; Pyne, S. G., *Org. Lett.* **2008**, *10*, 2769-2771.

**(1*R*,2*R*,3*R*,6*R*,7*S*,7*aR*)-1,2,6,7-Tetrabenzoyloxy-3-((*tert*-butyldimethylsilyloxy)methyl)-hexahydro-1*H*-pyrrolizine (13).**

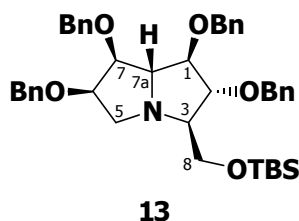

To a solution of **12** (0.792 g, 1.136 mmol) in pyridine (11 mL) was added triphenylphosphine (0.301 g, 1.148 mmol), triethylamine·hydrochloride (0.156 g, 1.136 mmol) and diisopropyl azodicarboxylate (0.56 mL, 2.841 mmol). The mixture was stirred at rt for 3 days. The volatiles were removed in *vacuo* then satd. CuSO<sub>4</sub> solution (20 mL) was added. The reaction mixture was extracted with CH<sub>2</sub>Cl<sub>2</sub> (3 x 25 mL). The combined CH<sub>2</sub>Cl<sub>2</sub> extracts were washed with satd. CuSO<sub>4</sub> solution (20 mL) and water (20 mL), dried (Na<sub>2</sub>CO<sub>3</sub>), filtered and then evaporated. FCC (100% petrol to 20:80 EtOAc/petrol) gave **13** as a yellow viscous oil (0.587 g, 76%).

$[\alpha]_D^{20}$  -34 (*c* 0.4, CHCl<sub>3</sub>).

IR  $\nu_{\max}$  (cm<sup>-1</sup>): 3070, 3040, 2924, 2852, 1454, 1120, 1097.

This compound had the same *R<sub>f</sub>*, MS and NMR spectroscopic data as reported for (+)-**13**.<sup>2</sup>

2. Ritthiwigrom, T.; Pyne, S. G., *Org. Lett.* **2008**, *10*, 2769-2771.

**((1*R*,2*R*,3*R*,6*R*,7*S*,7*aR*)-1,2,6,7-Tetrabenzoyloxy-hexahydro-1*H*-pyrrolizin-3-yl)methanol (14).**

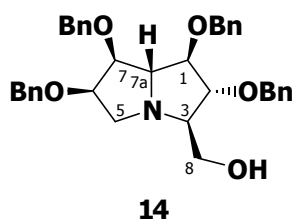

To a solution of **13** (1.417 g, 2.087 mmol) in MeOH (50 mL) was added dropwise conc. HCl solution (12.5 mL) and the mixture was stirred at rt for 18 h. The mixture was basified at 0 °C with aqueous NH<sub>3</sub> solution (28%). The mixture was extracted with EtOAc, dried (Na<sub>2</sub>CO<sub>3</sub>), evaporated and purified by FCC (50:50 EtOAc/petrol) to give **14** (1.058 g, 90%) as a pale yellow viscous oil. *R<sub>f</sub>* 0.11 (50:50 EtOAc/petrol).

$[\alpha]_D^{20}$  -35 (*c* 1.3, CHCl<sub>3</sub>). [Lit.<sup>2</sup> for (+)-**14**;  $[\alpha]_D^{23}$  +34 (*c* 1.3, CHCl<sub>3</sub>).

IR  $\nu_{\max}$  (cm<sup>-1</sup>): 3446, 3050, 2893, 2858, 1449, 1107, 1097.

This compound had the same  $R_f$ , MS and NMR spectroscopic data as reported for (+)-**14**.<sup>2</sup>

2. Ritthiwigrom, T.; Pyne, S. G., *Org. Lett.* **2008**, *10*, 2769-2771.

**(1R,2R,3R,6R,7S,7aR)-Hexahydro-3-(hydroxymethyl)-1H-pyrrolizine-1,2,6,7-tetraol (uniflorine A) (1).**

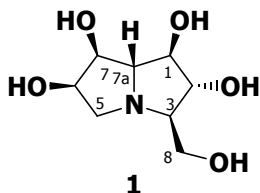

To a solution of **14** (0.636 g, 1.126 mmol) in MeOH (12 mL) was added PdCl<sub>2</sub> (0.300 g, 1.690 mmol). The mixture was stirred at rt under an atmosphere of H<sub>2</sub> (balloon) for 1 day. The mixture was filtered through a celite pad and the solids were washed with MeOH. The combined filtrates were evaporated *in vacuo* and the residue was dissolved in water (3 mL) and applied to a column of Amberlyst (OH<sup>-</sup>) A-26 resin (7 cm). Elution with water followed by evaporation *in vacuo* gave uniflorine A **1** (0.201 g, 87%) as a white solid. mp. 163.2-164.8 °C, (Lit.<sup>3</sup> mp. 174 - 178 °C).

$[\alpha]_D^{23}$  -3.7 (*c* 1.2, H<sub>2</sub>O). [Lit.<sup>3</sup> for (-)-uniflorine A;  $[\alpha]_D$  -4.4 ° (*c* 1.2, H<sub>2</sub>O).

This compound had the same  $R_f$ , MS, IR and NMR spectroscopic data as reported for (+)-**1**.<sup>2</sup>

2. Ritthiwigrom, T.; Pyne, S. G., *Org. Lett.* **2008**, *10*, 2769-2771.

3. Matsumura, T.; Kasai, M.; Hayashi, T.; Arisawa, M.; Momose, Y.; Arai, I.; Amagaya, S.; Komatsu, Y., *Pharmaceutical Biol.* **2000**, *38*, 302-307.

**Table 1** Physical and spectral Data for (-)-Uniflorine A<sup>3</sup> and **1**.

|                     | Uniflorine A <sup>3</sup>                                                            | Synthetic <b>1</b>                                                                   |                      |
|---------------------|--------------------------------------------------------------------------------------|--------------------------------------------------------------------------------------|----------------------|
| Physical Appearance | Colourless Microcrystals                                                             | White solid                                                                          |                      |
| Optical Rotation    | $[\alpha]_D -4.4^\circ$ (c 1.2, H <sub>2</sub> O)                                    | $[\alpha]_D^{23} -3.7$ (c 1.2, H <sub>2</sub> O)                                     |                      |
| Melting Point       | 174 - 178 °C                                                                         | 163.2-164.8 °C                                                                       |                      |
| Mass Spectrometry   | ISMS $m/z$ 206 (M <sup>+</sup> + H)                                                  | ESI +ve $m/z$ 206 (M + H <sup>+</sup> , 100%)                                        |                      |
| <sup>1</sup> H NMR  | 500 MHz, D <sub>2</sub> O                                                            | 500 MHz, D <sub>2</sub> O                                                            |                      |
|                     | 4.35 (m, 1H, H-2)                                                                    | 4.34 (dt, 1H, $J_{5\alpha,6} = J_{5\beta,6} = J_{6,7} = 4.8$ Hz, H-6)                |                      |
|                     | 4.18 (t, 1H, $J_{1,8a} = J_{1,2} = 4.5$ Hz, H-1)                                     | 4.17 (t, 1H, $J_{6,7} = J_{6,7a} = 4.5$ Hz, H-7)                                     |                      |
|                     | 3.94 (t, 1H, $J_{7,8} = J_{8,8a} = 7.7$ Hz, H-8)                                     | 3.92 (t, 1H, $J_{1,2} = J_{1,7a} = 7.5$ Hz, H-1)                                     |                      |
|                     | 3.81 (dd, 1H, $J_{6,7} = 9.0$ , $J_{7,8} = 7.7$ Hz, H-7)                             | 3.79 (t, 1H, $J_{1,2} = J_{2,3} = 8.5$ Hz, H-2)                                      |                      |
|                     | 3.76 (dd, 1H, $J_{5\beta,6} = 3.8$ , $J_{5\alpha,5\beta} = 11.8$ Hz, H-5 $\beta$ )   | 3.76 (dd, 1H, $J_{8,8'} = 11.8$ Hz, $J_{3,8'} = 3.8$ Hz, H-8')                       |                      |
|                     | 3.61 (dd, 1H, $J_{5\alpha,6} = 6.4$ , $J_{5\alpha,5\beta} = 11.8$ Hz, H-5 $\alpha$ ) | 3.61 (dd, 1H, $J_{3,8} = 6.5$ , $J_{8,8'} = 11.5$ Hz, H-8)                           |                      |
|                     | 3.14 (dd, 1H, $J_{8,8a} = 7.7$ , $J_{1,8a} = 4.5$ Hz, H-8a)                          | 3.12 (dd, 1H, $J_{1,7a} = 7.5$ , $J_{7,7a} = 5.0$ Hz, H-7a)                          |                      |
|                     | 3.04 (dd, 1H, $J_{2,3\alpha} = 5.1$ , $J_{3\alpha,3\beta} = 12.1$ Hz, H-3 $\alpha$ ) | 3.02 (dd, 1H, $J_{5\beta,6} = 5.8$ , $J_{5\alpha,5\beta} = 11.8$ Hz, H-5 $\beta$ )   |                      |
|                     | 2.98 (dd, 1H, $J_{2,3\beta} = 5.1$ , $J_{3\alpha,3\beta} = 12.1$ Hz, H-3 $\beta$ )   | 2.96 (dd, 1H, $J_{5\alpha,6} = 5.3$ , $J_{5\alpha,5\beta} = 12.3$ Hz, H-5 $\alpha$ ) |                      |
|                     | 2.76 (m, 1H, $J_{5\alpha,6} = 6.4$ , $J_{5\beta,6} = 3.8$ , $J_{6,7} = 9.0$ Hz, H-6) | 2.74 (m, 1H, H-3)                                                                    |                      |
| <sup>13</sup> C NMR | 125 MHz, D <sub>2</sub> O<br>(ref. TMS?)                                             | 125 MHz, D <sub>2</sub> O<br>(ref. MeCN, $\delta$ 1.47)                              | $\Delta\delta$ (ppm) |
|                     | 81.2 (d, C-8)                                                                        | 79.1 (C-1)                                                                           | 2.1                  |
|                     | 79.9 (d, C-7)                                                                        | 77.8 (C-2)                                                                           | 2.1                  |
|                     | 78.1 (d, C-1)                                                                        | 76.0 (C-7)                                                                           | 2.1                  |
|                     | 74.2 (d, C-2)                                                                        | 72.1 (C-6)                                                                           | 2.1                  |
|                     | 73.6 (d, C-8a)                                                                       | 71.5 (C-7a)                                                                          | 2.1                  |
|                     | 72.5 (d, C-6)                                                                        | 70.3 (C-3)                                                                           | 2.2                  |
|                     | 65.3 (t, C-5)                                                                        | 63.2 (C-8)                                                                           | 2.1                  |
|                     | 60.0 (t, C-3)                                                                        | 57.8 (C-5)                                                                           | 2.2                  |

3. Matsumura, T.; Kasai, M.; Hayashi, T.; Arisawa, M.; Momose, Y.; Arai, I.; Amagaya, S.; Komatsu, Y., *Pharmaceutical Biol.* **2000**, 38, 302-307.

(*R*)-*tert*-Butyl 2-(((1*R*,2*S*)-1,2-bis(benzyloxy)-2-((*S*)-2,2-dimethyl-1,3-dioxolan-4-yl)ethyl)-2,5-dihydro-1*H*-pyrrole-1-carboxylate (**15**).

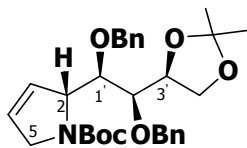

**15**

To a solution of the diol **8** (8.55 g, 25.84 mmol) in dry THF (260 mL) was added *n*-Bu<sub>4</sub>NI (954.3 mg, 2.58 mmol) and BnBr (9.27 mL, 78.0 mmol) follow by NaH (3.74 g, 78.0 mmol, 50 % in mineral oil) at 0 °C. After H<sub>2</sub> evolution had ceased (15 min) the reaction mixture was stirred at rt for 18 h. MeOH (50 mL) was then added followed by evaporation of all volatiles *in vacuo*. The residue was dissolved in EtOAc and filtered through celite, followed by further washings of the solids with EtOAc. The solvent was evaporated and the residue was purified by FCC (10:90 to 40:60 EtOAc/petrol) to give **15** as a yellow syrup (12.21 g, 92%). *R<sub>f</sub>* 0.21 (15:85 EtOAc/petrol).

$[\alpha]_D^{22} +56$  (*c* 1.4, CHCl<sub>3</sub>).

MS (ESI +ve) *m/z* 510 (*M* + H<sup>+</sup>, 30%).

HRMS (ESI +ve) calculated for C<sub>30</sub>H<sub>40</sub>NO<sub>6</sub> (*M*+H<sup>+</sup>) 510.2856, found 510.2854.

IR  $\nu_{\max}$  (cm<sup>-1</sup>): 2980, 2929, 1696, 1393, 1107, 1060.

<sup>1</sup>H NMR (500 MHz, CDCl<sub>3</sub>)  $\delta$  (major rotamer) 7.36-7.22 (m, 10H, Ar), 5.88 (app. t, 2H, *J* 8.5 Hz, H-3 and H-4), 4.81 (d, 1H, *J* 11.5 Hz, CHHPh), 4.74 (d, 1H, *J* 11.5 Hz, CHHPh), 4.55 (d, 1H, *J* 11.5 Hz, CHHPh), 4.50 (d, 1H, *J* 5.0 Hz, H-2), 4.35-4.25 (m, 2H, H-1' or H-2' and CHHPh), 4.16-3.98 (m, 2H, 2xH-5), 3.91 (d, 1H, *J* 4.5 Hz, H-1' or H-2'), 3.60-3.42 (m, 3H, 2xH-4' and H-3'), 1.45 (s, 9H, *t*-Bu), 1.42 (s, 3H, CH<sub>3</sub>), 1.35 (s, 3H, CH<sub>3</sub>).

<sup>13</sup>C NMR (125 MHz, CDCl<sub>3</sub>)  $\delta$  (major rotamer) 153.9 (CO), 138.1 (C), 137.6(C), 128.48 (CH), 128.4 (CH), 128.3 (CH), 128.2 (CH), 127.9 (CH), 127.7 (CH), 127.6 (C-3 or C-4), 126.3 (C-3 or C-4), 109.1 (C), 80.8 (C-3'), 79.9 (C), 79.3 (C-1' or C-2'), 77.1 (C-1' or C-2'), 74.1 (CH<sub>2</sub>), 73.7 (CH<sub>2</sub>), 67.5 (C-2), 65.5 (C-4'), 53.2 (C-5), 28.5 (C(CH<sub>3</sub>)<sub>3</sub>), 26.6 (CH<sub>3</sub>), 25.5 (CH<sub>3</sub>).

<sup>13</sup>C NMR (125 MHz, CDCl<sub>3</sub>)  $\delta$  (minor rotamer) 154.2, 138.4, 137.9, 128.42, 128.39, 128.3, 128.1, 127.8, 127.5, 126.9, 125.7, 109.0, 81.4, 79.7, 79.5, 77.5, 73.9, 73.5, 67.9, 65.8, 53.3, 28.4, 26.6, 25.6.

**(2*S*,3*R*,4*R*)-3,4-Bis(benzyloxy)-4-((*R*)-2,5-dihydro-1*H*-pyrrol-2-yl)butane-1,2-diol (16).**

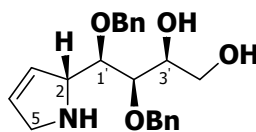

**16**

To a solution of **15** (10.93 g, 21.47 mmol) in MeOH (500 mL) was added dropwise conc. HCl solution (95 mL) and the mixture was stirred at rt for 30 h. The reaction mixture was basified at 0 °C with aqueous NH<sub>3</sub> solution (28%). The mixture was extracted with EtOAc and the combined extracts were dried (Na<sub>2</sub>CO<sub>3</sub>), evaporated and purified by FCC (100% EtOAc to 8:2:1 EtOAc/MeOH/NH<sub>3</sub>) to give **16** (6.0 g, 76%) as a brown foamy solid. *R<sub>f</sub>* 0.34 (9:0.8:0.2 EtOAc/MeOH/NH<sub>3</sub>).

[α]<sub>D</sub><sup>21</sup> +122 (*c* 3.2, CHCl<sub>3</sub>).

MS (ESI +ve) *m/z* 370 (*M* + H<sup>+</sup>, 100%).

HRMS (ESI +ve) calculated for C<sub>22</sub>H<sub>28</sub>NO<sub>4</sub> (*M*+H<sup>+</sup>) 370.2018, found 370.2009.

IR ν<sub>max</sub> (cm<sup>-1</sup>): 3390, 3288, 3062, 3027, 2955, 2909, 1078, 1059.

<sup>1</sup>H NMR (500 MHz, CDCl<sub>3</sub>) δ 7.3.4-7.27 (m, 10H, Ar), 5.97 (dd, 1H, *J* 6.0, 1.5 Hz, H-4), 5.89 (dd, 1H, *J* 6.0, 1.5 Hz, H-3), 4.73 (d, 1H, *J* 11.5 Hz, CHHPh), 4.67 (d, 1H, *J* 11.5 Hz, CHHPh), 4.60 (d, 1H, *J* 11.0 Hz, CHHPh), 4.53 (d, 1H, *J* 11.0 Hz, CHHPh), 4.27 (brs, 1H, H-2), 3.90-3.88 (m, 1H, H-3'), 3.76-3.70 (m, 3H, 2xH-5 and H-4'), 3.65-3.63 (m, 1H, H-2'), 3.61-3.56 (m, 2H, H-1' and H-4').

<sup>13</sup>C NMR (125 MHz, CDCl<sub>3</sub>) δ 138.0 (C), 137.9 (C), 129.9 (C-4), 128.8 (C-3), 128.42 (CH), 128.4 (CH), 128.2 (CH), 127.9 (CH), 127.8 (CH), 127.7 (CH), 81.6 (C-1'), 80.9 (C-2'), 74.4 (CH<sub>2</sub>), 74.2 (CH<sub>2</sub>), 70.6 (C-3'), 66.4 (C-2), 63.7 (C-4'), 52.7 (C-5).

**(2*S*,3*R*,4*R*)-3,4-Bis(benzyloxy)-1-(*tert*-butyldimethylsilyloxy)-4-((*R*)-2,5-dihydro-1*H*-pyrrol-2-yl)butan-2-ol (17).**

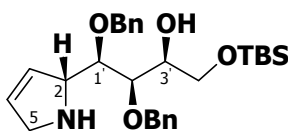

**17**

To a solution of the diol **16** (0.302 g, 0.816 mmol) and a crystal of 4-dimethylaminopyridine in THF (8 mL) under N<sub>2</sub> at rt was added imidazole (0.121 g, 1.776 mmol) and TBSCl (0.153 g, 1.02 mmol). The reaction mixture was stirred for

24 h and the reaction was quenched by the addition of water. The solvent was removed under reduced pressure and the residue was extracted with EtOAc. The combined extracts were washed with brine, dried (Na<sub>2</sub>CO<sub>3</sub>) and then evaporated to leave a residue which was chromatographed on silica gel by FCC (100% EtOAc to 10:2:1 EtOAc/MeOH/NH<sub>3</sub>) to give **17** (0.320 g, 81%) as a brown viscous oil. R<sub>f</sub> 0.65 (9:0.8:0.2 EtOAc/MeOH/NH<sub>3</sub>).

[α]<sub>D</sub><sup>21</sup> +93 (c 2.3, CHCl<sub>3</sub>).

MS (ESI +ve) *m/z* 484 (M + H<sup>+</sup>, 100%).

HRMS (ESI +ve) calculated for C<sub>28</sub>H<sub>42</sub>NO<sub>4</sub>Si (M+H<sup>+</sup>) 484.2883, found 484.2906.

IR ν<sub>max</sub> (cm<sup>-1</sup>): 3390, 3288, 3062, 3021, 2955, 2929, 1077, 1062.

<sup>1</sup>H NMR (500 MHz, CDCl<sub>3</sub>) δ 7.3.6-7.27 (m, 10H, Ar), 5.98 (dd, 1H, *J* 5.5, 1.5 Hz, H-4), 5.92 (dd, 1H, *J* 6.0, 2.0 Hz, H-3), 4.75 (d, 1H, *J* 12.0 Hz, CHHPh), 4.73 (d, 1H, *J* 10.0 Hz, CHHPh), 4.69 (d, 1H, *J* 11.0 Hz, CHHPh), 4.52 (d, 1H, *J* 11.0 Hz, CHHPh), 4.21-4.18 (m, 1H, H-2), 3.88-3.85 (m, 2H, H-2' and H-3'), 3.74-3.70 (m, 4H, 2xH-5 and 2xH-4'), 3.57 (app. t, 1H, *J* 7.0 Hz, H-1'), 0.91 (s, 9H, *t*-Bu), 0.08 (s, 3H, CH<sub>3</sub>), 0.07 (s, 3H, CH<sub>3</sub>).

<sup>13</sup>C NMR (125 MHz, CDCl<sub>3</sub>) δ 138.6 (C), 138.2 (C), 130.2 (C-4), 129.4 (C-3), 128.3 (CH), 128.2 (CH), 128.0 (CH), 127.8 (CH), 127.6 (CH), 127.5 (CH), 82.6 (C-1'), 79.8 (C-2'), 74.6 (CH<sub>2</sub>), 74.0 (CH<sub>2</sub>), 70.3 (C-3'), 66.2 (C-2), 63.2 (C-4'), 53.1 (C-5), 25.9 (C(CH<sub>3</sub>)<sub>3</sub>), 18.1 (C), -5.4 (CH<sub>3</sub>), -5.5 (CH<sub>3</sub>).

**(*R*)-(9*H*-Fluoren-9-yl)methyl 2-((1*R*,2*R*,3*S*)-1,2-bis(benzyloxy)-4-(*tert*-butyldimethylsilyloxy)-3-hydroxybutyl)-2,5-dihydro-1*H*-pyrrole-1-carboxylate (**18**).**

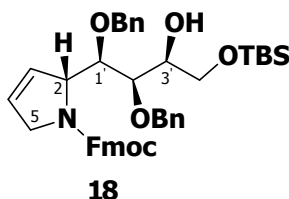

To a solution of **17** (6.05 g, 0.013 mol) in THF (125 mL) and satd. Na<sub>2</sub>CO<sub>3</sub> solution (60 mL) was added 9-fluorenylmethylchloroformate (3.89 g, 15.03 mmol) at 0 °C. The reaction mixture was stirred at 0 °C for 3 h. Water (20 mL) was added and the solvent was removed under reduced pressure and the residue was extracted with CH<sub>2</sub>Cl<sub>2</sub> (3x70 mL). The combined extracts were washed with brine, dried (Na<sub>2</sub>CO<sub>3</sub>) and then evaporated to leave a residue which was chromatographed on silica gel by



FCC (10:90 to 30:70 EtOAc/petrol) to give **18** (8.31 g, 94%) as a colourless viscous oil.  $R_f$  0.47 (20:80 EtOAc/petrol).

$[\alpha]_D^{24} +125$  ( $c$  2.0,  $\text{CHCl}_3$ ).

MS (ESI +ve)  $m/z$  706 ( $M + H^+$ , 20%).

HRMS (ESI +ve) calculated for  $\text{C}_{43}\text{H}_{52}\text{NO}_6\text{Si}$  ( $M+H^+$ ) 706.3564, found 706.3537.

IR  $\nu_{\max}$  ( $\text{cm}^{-1}$ ): 3061, 3028, 2945, 2924, 1700, 1413, 1107.

$^1\text{H}$  NMR (500 MHz,  $\text{CDCl}_3$ )  $\delta$  (major rotamer) 7.78-7.59 (m, 4H, Ar), 7.42-7.16 (m, 14H, Ar), 5.97-5.95 (m, 1H, H-3), 5.92-5.89 (m, 1H, H-4), 4.90 (d, 2H,  $J$  11.0 Hz, 2xCHHPh), 4.91-4.89 (m, 1H, H-2), 4.67-4.63 (m, 1H, CHHPh), 4.47 (d, 1H,  $J$  12.0 Hz, CHHPh), 4.45 (d, 1H,  $J$  8.0 Hz, H-1' or H-2'), 4.39 (dd, 2H,  $J$  7.0, 2.3 Hz,  $\text{CH}_2$  (Fmoc)), 4.26-4.20 (m, 1H, CH (Fmoc)), 4.26-4.07 (m, 2H, 2xH-5), 3.88 (dd, 1H,  $J$  13.5, 7.5 Hz, H-3'), 3.77 (d, 1H,  $J$  7.5 Hz, H-1' or H-2'), 0.90 (s, 9H, *t*-Bu), 0.07 (s, 3H,  $\text{CH}_3$ ), 0.06 (s, 3H,  $\text{CH}_3$ ).

$^{13}\text{C}$  NMR (125 MHz,  $\text{CDCl}_3$ )  $\delta$  (major rotamer) 154.3 (CO), 144.0 (C), 143.9 (C), 141.3 (C), 141.2 (C), 138.4 (C), 138.2 (C), 128.3 (CH), 128.2 (CH), 128.1 (CH), 127.9 (CH), 127.6 (CH), 127.5 (CH), 126.9 (CH), 125.0 (CH), 119.9 (CH), 78.3 (C-1'), 77.8 (C-2'), 74.7 ( $\text{CH}_2$ ), 74.3 ( $\text{CH}_2$ ), 70.8 (C-3'), 66.9 ( $\text{CH}_2$  (Fmoc)), 66.2 (C-2), 63.6 (C-4'), 53.4 (C-5), 47.2 (CH (Fmoc)), 25.8 ( $\text{C}(\text{CH}_3)_3$ ), 18.1 (C), -5.4 ( $\text{CH}_3$ ), -5.5 ( $\text{CH}_3$ ).

$^{13}\text{C}$  NMR (125 MHz,  $\text{CDCl}_3$ )  $\delta$  (minor rotamer) 154.3, 144.0, 143.8, 141.3, 141.2, 138.3, 138.2, 128.2, 127.8, 127.7, 127.6, 126.7, 126.5, 125.5, 124.7, 119.9, 80.2, 78.6, 74.9, 74.8, 71.0, 65.9, 65.5, 63.5, 54.2, 47.7, 25.7, 18.0, -5.4.

**(1*S*,2*S*,5*R*)-(9*H*-Fluoren-9-yl)methyl 2-((1*R*,2*R*,3*S*)-1,2-bis(benzyloxy)-4-(*tert*-butyldimethylsilyloxy)-3-hydroxybutyl)-6-oxa-3-azabicyclo[3.1.0]hexane-3-carboxylate (**19**).**

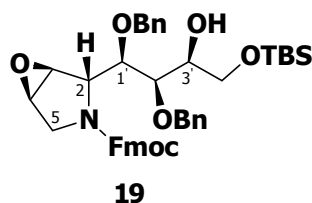

To a solution of the olefin **18** (2.37 g, 3.37 mmol) in MeCN (35 mL) was added  $\text{Na}_2\text{EDTA}$  (13.5 mL,  $4 \times 10^{-4}$  M) and  $\text{CF}_3\text{C}(\text{O})\text{CH}_3$  (6.8 mL, 7.60 mmol). The reaction was chilled to 0 °C before the portionwise addition of a mixture of  $\text{NaHCO}_3$  (4.24 g, 50.47 mmol) and oxone (4.14 g, 6.73 mmol) over 15 min. After stirring for 2 h at 0

°C, the mixture was poured into water followed by removed of the volatiles under reduced pressure. The residue was extracted with CH<sub>2</sub>Cl<sub>2</sub> (3x40 mL) and the combined organic extracts were washed with brine, dried (Na<sub>2</sub>CO<sub>3</sub>) and then evaporated to leave a residue which was chromatographed on silica gel by FCC (10:90 to 20:80 EtOAc/petrol) to give **19** (1.95 g, 81%) as a pale yellow oil. R<sub>f</sub> 0.42 (20:80 EtOAc/petrol).

[α]<sub>D</sub><sup>25</sup> +99 (*c* 1.1, CHCl<sub>3</sub>).

MS (ESI +ve) *m/z* 744 (M + Na<sup>+</sup>, 100%).

HRMS (ESI +ve) calculated for C<sub>43</sub>H<sub>51</sub>NO<sub>7</sub>SiNa (M+Na<sup>+</sup>) 744.3333, found 744.3360.

IR ν<sub>max</sub> (cm<sup>-1</sup>): 3062, 2945, 2924, 2858, 1700, 1454, 1110.

<sup>1</sup>H NMR (500 MHz, CDCl<sub>3</sub>) δ (major rotamer) 7.76-7.54 (m, 4H, Ar), 7.41-7.16 (m, 14H, Ar), 4.86 (d, 1H, *J* 10.5 Hz, CHHPh), 4.67 (d, 1H, *J* 12.0 Hz, CHHPh), 4.64 (d, 1H, *J* 11.5 Hz, CHHPh), 4.36 (d, 1H, *J* 11.0 Hz, CHHPh), 4.36-4.30 (m, 3H, CH<sub>2</sub> (Fmoc) and H-2), 4.26 (brs, 1H, H-1'), 4.19-4.15 (m, 1H, CH (Fmoc)), 3.91-3.86 (m, 1H, H-3'), 3.86-3.80 (m, 2H, H-2' and H-3), 3.74-3.67 (m, 2H, H-4' and H-5), 3.63 (d, 1H, *J* 2.0 Hz, H-4), 3.59-3.53 (m, 1H, H-4'), 3.24-3.20 (m, 1H, H-5), 0.88 (s, 9H, *t*-Bu), 0.04 (s, 3H, CH<sub>3</sub>), 0.03 (s, 3H, CH<sub>3</sub>).

<sup>13</sup>C NMR (125 MHz, CDCl<sub>3</sub>) δ (major rotamer) 154.9 (CO), 143.7 (C), 141.3 (C), 138.0 (C), 137.8 (C), 128.7 (CH), 128.2 (CH), 127.9 (CH), 127.8 (CH), 127.6 (CH), 127.1 (CH), 127.0 (CH), 125.0 (CH), 124.9 (CH), 119.9 (CH), 79.1 (C-1'), 77.2 (C-2'), 74.9 (CH<sub>2</sub>), 74.4 (CH<sub>2</sub>), 70.6 (C-3'), 67.1 (CH<sub>2</sub> (Fmoc)), 63.5 (C-4'), 60.1 (C-2), 56.3 (C-3), 55.6 (C-4), 47.8 (C-5), 47.1 (CH (Fmoc)), 25.8 (C(CH<sub>3</sub>)<sub>3</sub>), 18.1 (C), -5.4 (CH<sub>3</sub>), -5.5 (CH<sub>3</sub>).

<sup>13</sup>C NMR (125 MHz, CDCl<sub>3</sub>) δ (minor rotamer) 155.0, 144.0, 141.2, 137.9, 137.7, 127.8, 127.7, 127.69, 127.64, 127.63, 127.5, 127.4, 125.0, 124.7, 120.0, 80.6, 78.0, 75.0, 74.8, 70.8, 66.2, 63.4, 59.8, 56.4, 54.9, 48.2, 47.6, 25.7, 18.07, -5.45, -5.48.

**(1*S*,2*S*,5*R*)-(9*H*-Fluoren-9-yl)methyl 2-((1*R*,2*S*,3*S*)-1,2-bis(benzyloxy)-4-(*tert*-butyldimethylsilyloxy)-3-(methylsulfonyloxy)butyl)-6-oxa-3-azabicyclo[3.1.0]hexane-3-carboxylate (20).**

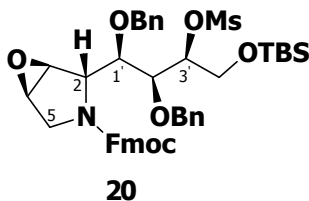

To a solution of **19** (0.414 g, 0.574 mmol) in anhydrous CH<sub>2</sub>Cl<sub>2</sub> (6 mL) was added anhydrous Et<sub>3</sub>N (0.24 mL, 1.723 mmol) and methanesulfonyl chloride (0.089 mL, 1.148 mmol). The reaction mixture was stirred at 0 °C under an atmosphere of N<sub>2</sub> for 3 h, followed by the evaporation of all volatiles *in vacuo*. Water (20 mL) was added and the residue was extracted with CH<sub>2</sub>Cl<sub>2</sub> (3x20 mL). The combined organic extracts were washed with brine, dried (Na<sub>2</sub>CO<sub>3</sub>) and then evaporated to leave a residue which was chromatographed on silica gel by FCC (10:90 to 30:70 EtOAc/petrol) to give **20** (0.433 g, 94%) as a pale yellow oil. *R*<sub>f</sub> 0.5 (30:70 EtOAc/petrol).

[α]<sub>D</sub><sup>25</sup> +64 (*c* 1.1, CHCl<sub>3</sub>)

MS (ESI +ve) *m/z* 822 (M + Na<sup>+</sup>, 100%).

HRMS (ESI +ve) calculated for C<sub>44</sub>H<sub>54</sub>NO<sub>9</sub>SSi (M+H<sup>+</sup>) 800.3289, found 800.3273.

IR ν<sub>max</sub> (cm<sup>-1</sup>): 2950, 2924, 2888, 2852, 1695, 1360, 1328, 1175, 1110.

<sup>1</sup>H NMR (500 MHz, CDCl<sub>3</sub>) δ (major rotamer) 7.70-7.66 (m, 2H, Ar), 7.45 (app. t, 2H, *J* 6.8 Hz, Ar), 7.35-7.11 (m, 14H, Ar), 4.76-4.73 (m, 1H, H-3'), 4.64 (d, 1H, *J* 10.5 Hz, CHHPH), 4.64-4.61 (m, 2H, 2xCHHPH), 4.34 (d, 1H, *J* 11.5 Hz, CHHPH), 4.31-4.29 (m, 2H, CH<sub>2</sub> (Fmoc)), 4.16 (brs, 1H, H-2), 4.13 (app. t, 1H, *J* 7.0 Hz, CH (Fmoc)), 4.02-4.00 (m, 2H, H-1' and H-2'), 3.97-3.94 (m, 2H, 2x H-4'), 3.74-3.72 (m, 1H, H-3), 3.68 (d, 1H, *J* 12.0 Hz, H-5), 3.58-3.56 (m, 1H, H-4), 3.20 (d, 1H, *J* 13.0 Hz, H-5), 3.04 (s, 3H, CH<sub>3</sub> (Ms)), 0.82 (s, 9H, *t*-Bu), 0.04 (s, 6H, CH<sub>3</sub>).

<sup>13</sup>C NMR (125 MHz, CDCl<sub>3</sub>) δ (major rotamer) 154.9 (CO), 144.0 (C), 143.7 (C), 141.3 (C), 141.2 (C), 137.9 (C), 137.5 (C), 128.5 (CH), 128.4 (CH), 128.1 (CH), 128.0 (CH), 127.8 (CH), 127.7 (CH), 127.0 (CH), 125.0 (CH), 124.9 (CH), 120.0 (CH), 81.5 (C-3'), 79.1 (C-1'), 78.6 (C-2'), 75.7 (CH<sub>2</sub>), 75.0 (CH<sub>2</sub>), 67.1 (CH<sub>2</sub> (Fmoc)), 61.1 (C-4'), 60.6 (C-2), 56.0 (C-3), 55.6 (C-4), 47.8 (C-5), 47.2 (CH (Fmoc)), 38.4 (CH<sub>3</sub> (Ms)), 25.8 (C(CH<sub>3</sub>)<sub>3</sub>), 18.1 (C), -5.4 (CH<sub>3</sub>), -5.5 (CH<sub>3</sub>).

(1*aR*,4*R*,5*R*,6*R*,6*aS*,6*bS*)-5,6-Bis(benzyloxy)-4-((*tert*-butyldimethylsilyloxy)methyl)hexahydro-1*aH*-oxireno[2,3-*a*]pyrrolizine (**21**) and (1*aR*,5*S*,6*S*,7*R*,7*aS*,7*bS*)-6,7-bis(benzyloxy)-5-((*tert*-butyldimethylsilyloxy)octahydrooxireno[2,3-*a*]indolizine (**22**).

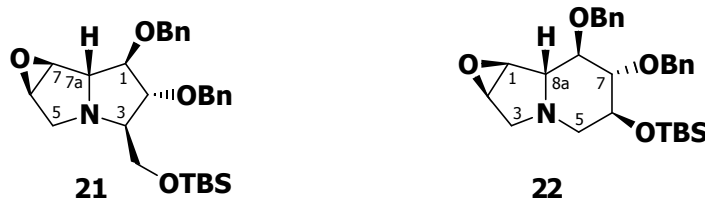

To a solution of **20** (470.3 mg, 0.589 mmol) in MeCN (6 mL) was added piperidine (0.12 mL, 1.12 mmol). The reaction was stirring for 15 h at rt, the volatiles were removed under reduced pressure and the residue was purified by FCC (10:90 to 30:70 EtOAc/petrol) to give a mixture of **21** and **22** (91:9) as a pale yellow oil (271.0 mg, 96%). A pure sample of **21** was obtained by further purification of this mixture by FCC to give **21** as yellow needles.

**21**:  $R_f$  0.27 (30:70 EtOAc/petrol).

mp. 40.9-43.1 °C (yellow needles)

$[\alpha]_D^{24} +12$  ( $c$  1.0, CHCl<sub>3</sub>).

MS (ESI +ve)  $m/z$  482 ( $M + H^+$ , 100%).

HRMS (CI +ve) calculated for C<sub>28</sub>H<sub>40</sub>NO<sub>4</sub>Si ( $M+H^+$ ) 482.2727, found 482.2729.

IR  $\nu_{\max}$  (cm<sup>-1</sup>): 3032, 2945, 2924, 2858, 1255, 1109.

<sup>1</sup>H NMR (500 MHz, CDCl<sub>3</sub>)  $\delta$  7.36-7.24 (m, 10H, Ar), 4.61 (d, 1H,  $J$  12.0 Hz, CHHPh), 4.60 (d, 1H,  $J$  11.5 Hz, CHHPh), 4.54 (d, 1H,  $J$  12.0 Hz, CHHPh), 4.51 (d, 1H,  $J$  12.0 Hz, CHHPh), 4.15 (app. t, 1H,  $J$  3.8 Hz, H-2), 3.91 (dd, 1H,  $J$  7.3, 3.8 Hz, H-1), 3.69-3.68 (m, 1H, H-6), 3.66 (dd, 1H,  $J$  10.0, 6.0 Hz, H-8), 3.64-3.62 (m, 2H, H-7 and H-7a), 3.50 (app. t, 1H,  $J$  10.0 Hz, H-8), 3.45 (d, 1H,  $J$  11.5 Hz, H-5), 3.08-3.04 (m, 1H, H-3), 2.98 (d, 1H,  $J$  12.0 Hz, H-5), 0.88 (s, 9H, *t*-Bu), 0.04 (s, 3H, CH<sub>3</sub>), 0.03 (s, 3H, CH<sub>3</sub>).

<sup>13</sup>C NMR (125 MHz, CDCl<sub>3</sub>)  $\delta$  138.1 (C), 137.7 (C), 128.4 (CH), 128.3 (CH), 127.8 (CH), 127.7 (CH), 127.64 (CH), 127.6 (CH), 88.7 (C-2), 85.9 (C-1), 72.1 (CH<sub>2</sub>), 71.8 (CH<sub>2</sub>), 70.8 (C-3), 69.0 (C-7a), 64.4 (C-8), 58.5 (C-7), 57.0 (C-6), 55.6 (C-5), 25.9 (C(CH<sub>3</sub>)<sub>3</sub>), 18.2 (C), -5.4 (CH<sub>3</sub>), -5.43 (CH<sub>3</sub>).

**(1*S*,2*S*,5*R*,6*R*,7*R*,7*aR*)-6,7-Bis(benzyloxy)-5-(hydroxymethyl)hexahydro-1*H*-pyrrolizine-1,2-diol (**23**).**

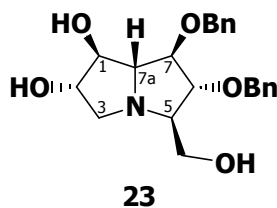

To a solution of the epoxide **21** (37.4 mg, 0.078 mmol) in anhydrous CH<sub>2</sub>Cl<sub>2</sub> (4 mL) was added NaHSO<sub>4</sub> (46.7 mg, 0.389 mmol). The reaction mixture was stirred and heated at reflux for 2 days under an atmosphere of N<sub>2</sub>. The reaction was quenched by the addition of water (5 mL) and stirred for 1 h. The solvent was removed under reduced pressure and the residue was extracted with EtOAc (3x10 mL). The combined extracts were dried (Na<sub>2</sub>CO<sub>3</sub>) and evaporated. NMR analysis of this crude reaction mixture showed an 86:14 mixture of regioisomers. The crude mixture was purified by FCC (100% EtOAc to 8.5:1:0.5 EtOAc/MeOH/NH<sub>3</sub>) to give **23** (a 92:8 mixture of diastereomers) as a pale yellow oil (15.3 mg, 51%).

**23** (on a 92:8 mixture of diastereomers):

R<sub>f</sub> 0.34 (8.6:1.0:0.4 / EtOAc:MeOH:NH<sub>3</sub>).

[α]<sub>D</sub><sup>23</sup> +19 (*c* 1.1, CHCl<sub>3</sub>).

MS (ESI +ve) *m/z* 386 (M + H<sup>+</sup>, 100%).

HRMS (ESI +ve) calculated for C<sub>22</sub>H<sub>28</sub>NO<sub>5</sub> (M+H<sup>+</sup>) 386.1967, found 386.1967.

IR ν<sub>max</sub> (cm<sup>-1</sup>): 3390, 3027, 2929, 2873, 1449, 1103, 1063.

<sup>1</sup>H NMR (500 MHz, CD<sub>3</sub>OD) δ 7.36-7.24 (m, 10H, Ar), 4.68 (d, 2H, *J* 12.0 Hz, 2xCHHPh), 4.60 (d, 1H, *J* 11.5 Hz, CHHPh), 4.54 (d, 1H, *J* 12.0 Hz, CHHPh), 4.19 (app. t, 1H, *J* 5.3 Hz, H-1), 4.08 (dd, 1H, *J* 10.5, 5.5 Hz, H-2), 4.04 (app. t, 1H, *J* 5.3 Hz, H-7), 3.98 (dd, 1H, *J* 6.5, 5.5 Hz, H-6), 3.62 (dd, 1H, *J* 11.0, 4.8 Hz, H-8), 3.51 (dd, 1H, *J* 11.3, 5.8 Hz, H-8), 3.30 (m, 1H, H-5), 3.27 (app. t, 1H, *J* 5.0 Hz, H-7a), 3.18 (app. dt, 1H, *J* 5.8, 5.0 Hz, H-3), 2.87 (dd, 1H, *J* 11.3, 5.8 Hz, H-5).

<sup>13</sup>C NMR (125 MHz, CD<sub>3</sub>OD) δ 139.6 (C), 139.5 (C), 129.4 (CH), 129.3 (CH), 128.95 (CH), 129.5 (CH), 128.7 (CH), 128.5 (CH), 87.2 (C-1), 85.6 (C-6), 81.4 (C-7), 79.2 (C-2), 75.2 (C-7a), 73.3 (CH<sub>2</sub>), 72.9 (CH<sub>2</sub>), 72.6 (C-3), 63.5 (C-8), 60.1 (C-5).

**(1*R*,2*R*,3*R*,6*S*,7*S*)-3-(Hydroxymethyl)hexahydro-1*H*-pyrrolizine-1,2,6,7-tetraol (casuarine) (2).**

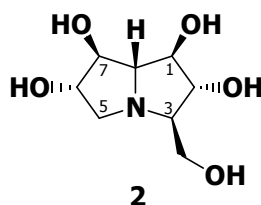

To a solution of 92% diastereomerically pure **23** (21.0 mg, 0.055 mmol) in MeOH (2 mL) was added PdCl<sub>2</sub> (10.0 mg, 0.055 mmol). The mixture was stirred at rt under an atmosphere of H<sub>2</sub> (balloon) for 1.5 h. The mixture was filtered through a celite pad and the solids were washed with MeOH. The combined filtrates were evaporated *in vacuo* and the residue was dissolved in water (1 mL) and applied to a column of Amberlyst (OH<sup>-</sup>) A-26 resin (3 cm). Elution with water followed by evaporation *in vacuo* gave casuarine **2** (dr = 95:5) as a brown foamy solid (10.4 mg, 93%).

[ $\alpha$ ]<sub>D</sub><sup>23</sup> +18.1 (*c* 1.0, H<sub>2</sub>O). [Lit.<sup>4</sup> ; [ $\alpha$ ]<sub>D</sub><sup>24</sup> +16.9 ° (*c* 0.8, H<sub>2</sub>O)].

MS (ESI +ve) *m/z* 206 (M + H<sup>+</sup>, 100%).

HRMS (ESI +ve) calculated for C<sub>8</sub>H<sub>16</sub>NO<sub>5</sub> (M+H<sup>+</sup>) 206.1028, found 206.0953.

IR  $\nu_{\max}$  (cm<sup>-1</sup>): 3284, 2919, 1378, 1128, 1102, 1029.

<sup>1</sup>H NMR (500 MHz, D<sub>2</sub>O)  $\delta$  4.22-4.18 (m, 2H, H-6 and H-7), 4.16 (t, 1H, *J*<sub>1,2</sub> = *J*<sub>1,7a</sub> = 8.7 Hz, H-1), 3.79 (t, 1H, *J*<sub>1,2</sub> = *J*<sub>2,3</sub> = 8.0 Hz, H-2), 3.77 (dd, 1H, *J*<sub>8,8'</sub> = 10.0, *J*<sub>3,8</sub> = 3.5 Hz, H-8), 3.61 (dd, 1H, *J*<sub>8,8'</sub> = 11.3, *J*<sub>3,8'</sub> = 6.8 Hz, H-8'), 3.27 (dd, 1H, *J*<sub>5 $\alpha$ ,5 $\beta$</sub>  = 12.3, *J*<sub>5 $\beta$ ,6</sub> = 4.3 Hz, H-5 $\beta$ ), 3.06 (dd, 1H, *J*<sub>1,7a</sub> = 8.0, *J*<sub>7,7a</sub> = 3.0 Hz, H-7a), 3.04-3.00 (m, 1H, H-3), 2.90 (dd, 1H, *J*<sub>5 $\alpha$ ,5 $\beta$</sub>  = 11.8, *J*<sub>5 $\alpha$ ,6</sub> = 4.3 Hz, H-5 $\alpha$ ).

<sup>13</sup>C NMR (125 MHz, D<sub>2</sub>O)  $\delta$  79.9 (C-7), 78.9 (C-1), 78.5 (C-6), 77.8 (C-2), 73.1 (C-7a), 71.0 (C-3), 63.5 (C-8), 59.0 (C-5).

4. Nash, R. J.; Thomas, P. I.; Waigh, R. D.; Fleet, G. W. J.; Wormald, M. R.; de Q. Lilley, P. M.; Watkin, D. J., *Tetrahedron Lett.* **1994**, 35, 7849-7852.

**Table 2** Physical and spectral Data for (+)-Casuarine<sup>4</sup> and **2**.

|                     | Casuarine <sup>4</sup>                                   | Synthetic <b>2</b>                                                                |                      |
|---------------------|----------------------------------------------------------|-----------------------------------------------------------------------------------|----------------------|
| Physical Appearance | Crystallize solid                                        | Brown foamy solid                                                                 |                      |
| Optical Rotation    | $[\alpha]_D^{24} +16.9^\circ$ (c 0.8, H <sub>2</sub> O)  | $[\alpha]_D^{23} +18.1$ (c 1.0, H <sub>2</sub> O)                                 |                      |
| Melting Point       | 181-182 °C                                               | -                                                                                 |                      |
| <sup>1</sup> H NMR  | 500 MHz, D <sub>2</sub> O (pH = 8.35)                    | 500 MHz, D <sub>2</sub> O                                                         |                      |
|                     | 4.21 (m, 1H, $J = 4.7, 4.0$ Hz, H-6)                     | 4.22-4.18 (m, 2H, H-6 and H-7)                                                    |                      |
|                     | 4.19 (m, 1H, $J = 3.5$ Hz, H-7)                          |                                                                                   |                      |
|                     | 4.162 (t, 1H, $J = 8.0$ Hz, H-1)                         | 4.16 (t, 1H, $J_{1,2} = J_{1,7a} = 8.7$ Hz, H-1)                                  |                      |
|                     | 3.796 (t, 1H, $J = 8.0$ Hz, H-2)                         | 3.79 (t, 1H, $J_{1,2} = J_{2,3} = 8.0$ Hz, H-2)                                   |                      |
|                     | 3.771 (dd, 1H, $J = 11.9, 3.8$ Hz, H-8)                  | 3.77 (dd, 1H, $J_{8,8'} = 10.0, J_{3,8} = 3.5$ Hz, H-8)                           |                      |
|                     | 3.611 (dd, 1H, $J = 11.9, 6.6$ Hz, H-8')                 | 3.61 (dd, 1H, $J_{8,8'} = 11.3, J_{3,8'} = 6.8$ Hz, H-8')                         |                      |
|                     | 3.270 (dd, 1H, $J = 12.2, 4.7$ Hz, H-5 $\beta$ )         | 3.27 (dd, 1H, $J_{5\alpha,5\beta} = 12.3, J_{5\beta,6} = 4.3$ Hz, H-5 $\beta$ )   |                      |
|                     | 3.071 (dd, 1H, $J = 8.0, 3.5$ Hz, H-7a)                  | 3.06 (dd, 1H, $J_{1,7a} = 8.0, J_{7,7a} = 3.0$ Hz, H-7a)                          |                      |
|                     | 3.04-3.00 (m, 1H, $J = 8.0, 6.6, 3.8$ Hz, H-3)           | 3.04-3.00 (m, 1H, H-3)                                                            |                      |
|                     | 2.911 (dd, 1H, $J = 12.2, 4.0$ Hz, H-5 $\alpha$ )        | 2.90 (dd, 1H, $J_{5\alpha,5\beta} = 11.8, J_{5\alpha,6} = 4.3$ Hz, H-5 $\alpha$ ) |                      |
| <sup>13</sup> C NMR | 125 MHz, D <sub>2</sub> O<br>(ref acetone $\delta$ 29.8) | 125 MHz, D <sub>2</sub> O<br>(ref acetone $\delta$ 29.8)                          | $\Delta\delta$ (ppm) |
|                     | 78.8 (C-7)                                               | 79.9 (C-7)                                                                        | -1.1                 |
|                     | 77.8 (C-1)                                               | 78.9 (C-1)                                                                        | -1.1                 |
|                     | 77.4 (C-6)                                               | 78.5 (C-6)                                                                        | -1.1                 |
|                     | 76.6 (C-2)                                               | 77.8 (C-2)                                                                        | -1.2                 |
|                     | 72.1 (C-7a)                                              | 73.1 (C-7a)                                                                       | -1.0                 |
|                     | 70.0 (C-3)                                               | 71.0 (C-3)                                                                        | -1.0                 |
|                     | 62.2 (C-8)                                               | 63.5 (C-8)                                                                        | -1.3                 |
|                     | 58.0 (C-5)                                               | 59.0 (C-5)                                                                        | -1.0                 |

4. Nash, R. J.; Thomas, P. I.; Waigh, R. D.; Fleet, G. W. J.; Wormald, M. R.; de Q. Lilley, P. M.; Watkin, D. J., *Tetrahedron Lett.* **1994**, 35, 7849-7852.

**(1R,5R,6R,7R,7aR)-6,7-Bis(benzyloxy)-5-(hydroxymethyl)hexahydro-1H-pyrrolizin-1-ol (24),**

(1*R*,5*R*,6*R*,7*R*,7*aR*)-6,7-bis(benzyloxy)-5-((*tert*-butyldimethylsilyloxy)methyl)hexahydro-1*H*-pyrrolizin-1-ol (**26**) and (1*R*,6*S*,7*S*,8*R*,8*aR*)-7,8-bis(benzyloxy)-6-((*tert*-butyldimethylsilyloxy)octahydroindolizin-1-ol (**26a**)

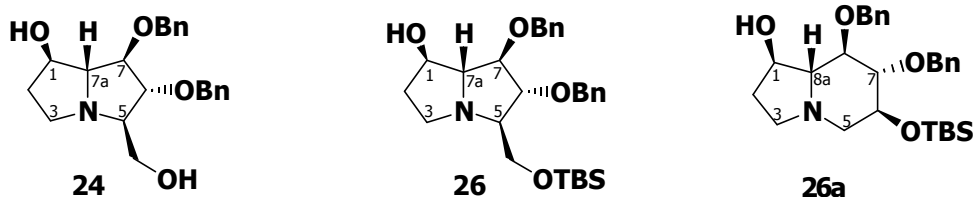

To solution of a 91:9 mixture of **21** and **22** (611.5 mg, 1.271 mmol) in anhydrous THF (13 mL) was added dropwise a solution of lithium aluminium hydride (1M in THF, 1.53 mL, 1.526 mmol). The reaction mixture was stirring for 8 h at 0 °C. The solvent was evaporated and the mixture was chromatographed on silica gel by FCC (50:50 EtOAc/petrol to 8.5:1.0:0.5 EtOAc/MeOH/NH<sub>3</sub>) to give a mixture of **24** and **25** (**24**:**25** = 88:12) as a yellow viscous oil (106 mg, 27%), a mixture of **26** and **27** (**26**:**27** = 92:8) as a yellow viscous oil (330 mg, 64%), **26a** (10.3 mg, 2%) as a pale yellow oil and unreacted starting material (97.5 mg, 16%).

**24** (on 88:12 mixture): *R<sub>f</sub>* 0.40 (9:1:0.2 EtOAc/MeOH/NH<sub>3</sub>).

$[\alpha]_D^{22} +6$  (*c* 1.1, CHCl<sub>3</sub>).

MS (ESI +ve) *m/z* 370 (*M* + H<sup>+</sup>, 100%).

HRMS (CI +ve) calculated for C<sub>22</sub>H<sub>28</sub>NO<sub>4</sub> (*M*+H<sup>+</sup>) 370.2018, found 370.2000.

IR  $\nu_{\max}$  (cm<sup>-1</sup>): 3385, 2924, 2873, 1449, 1362, 1105.

<sup>1</sup>H NMR (500 MHz, CDCl<sub>3</sub>)  $\delta$  7.36-7.28 (m, 10H, Ar), 4.73 (d, 1H, *J* 11.5 Hz, CHHPh), 4.65 (d, 1H, *J* 12.0 Hz, CHHPh), 4.62 (d, 2H, *J* 10.0 Hz, 2xCHHPh), 4.19-4.17 (m, 1H, H-7), 4.07 (app. t, 1H, *J* 6.8 Hz, H-2), 3.80 (app. t, 1H, *J* 6.0 Hz, H-1), 3.56 (app. t, 2H, *J* 3.3 Hz, 2xH-8), 3.29 (dd, 1H, *J* 6.0, 3.5 Hz, H-7a), 3.17-3.12 (m, 1H, H-5), 2.82-2.79 (m, 1H, H-3), 2.78-2.73 (m, 1H, H-5), 2.04-1.97 (m, 1H, H-6), 1.78-1.73 (m, 1H, H-6).

<sup>13</sup>C NMR (125 MHz, CDCl<sub>3</sub>)  $\delta$  138.1 (C), 138.0 (C), 128.5 (CH), 128.4 (CH), 127.9 (CH), 127.8 (CH), 127.78 (CH), 127.7 (CH), 86.6 (C-1), 83.7 (C-2), 76.7 (C-7), 75.7 (C-7a), 72.9 (CH<sub>2</sub>), 72.2 (CH<sub>2</sub>), 69.3 (C-3), 60.5 (C-8), 51.6 (C-5), 33.7 (C-6).

To a solution of the diol **24** (0.145 g, 0.039 mmol) and a crystal of 4-dimethylaminopyridine in THF (4 mL) under N<sub>2</sub> at rt was added imidazole (0.056 g, 0.083 mmol) and TBSCl (0.071 g, 0.047 mmol). The reaction mixture was stirred for



2 days and the reaction was quenched by the addition of water (10 mL). The solvent was removed under reduced pressure and the residue was extracted with EtOAc (3x20 mL). The combined extracts were washed with brine, dried (Na<sub>2</sub>CO<sub>3</sub>) and then evaporated to leave a residue which was chromatographed on silica gel by FCC (100% EtOAc to 10:2:1 EtOAc/MeOH/NH<sub>3</sub>) to give a mixture of **26** and **27** (**26:27** = 82:18) (0.056 g, 61%) as a yellow viscous oil.

**26** (on 92:8 mixture): R<sub>f</sub> 0.44 (70:30 EtOAc/petrol).

[α]<sub>D</sub><sup>22</sup> -16 (c 2.3, CHCl<sub>3</sub>).

MS (ESI +ve) *m/z* 484 (M + H<sup>+</sup>, 100%).

HRMS (CI +ve) calculated for C<sub>28</sub>H<sub>42</sub>NO<sub>4</sub>Si (M+H<sup>+</sup>) 484.2883, found 484.2891.

IR ν<sub>max</sub> (cm<sup>-1</sup>): 3380, 2929, 2852, 1454, 1244, 1098.

<sup>1</sup>H NMR (500 MHz, CDCl<sub>3</sub>) δ 7.35-7.25 (m, 10H, Ar), 4.64 (d, 1H, *J* 11.5 Hz, CHHPh), 4.63 (d, 1H, *J* 12.0 Hz, CHHPh), 4.59 (d, 2H, *J* 12.0 Hz, 2xCHHPh), 4.17 (app. dt, 1H, *J* 5.0, 5.0 Hz, H-7), 3.95 (app. t, 1H, *J* 5.3 Hz, H-2), 3.86 (app. t, 1H, *J* 4.8 Hz, H-1), 3.65 (dd, 1H, *J* 10.0, 6.0 Hz, H-8), 3.59 (dd, 1H, *J* 9.8, 6.3 Hz, H-8), 3.26 (app. t, 1H, *J* 4.8 Hz, H-7a), 3.24-3.19 (m, 1H, H-5), 2.91-2.83 (m, 2H, H-3 and H-5), 2.09-2.03 (m, 1H, H-6), 1.74-1.67 (m, 1H, H-6), 0.88 (s, 9H, *t*-Bu), 0.04 (s, 3H, CH<sub>3</sub>), 0.03 (s, 3H, CH<sub>3</sub>).

<sup>13</sup>C NMR (125 MHz, CDCl<sub>3</sub>) δ 138.4 (C), 138.2 (C), 128.4 (CH), 128.3 (CH), 127.74 (CH), 127.7 (CH), 127.61 (CH), 127.6 (CH), 86.9 (C-1), 85.5 (C-2), 76.6 (C-7), 76.4 (C-7a), 72.2 (CH<sub>2</sub>), 71.9 (CH<sub>2</sub>), 70.8 (C-3), 65.6 (C-8), 53.2 (C-5), 34.3 (C-6), 26.0 (C(CH<sub>3</sub>)<sub>3</sub>), 18.3 (C), -5.4 (2xCH<sub>3</sub>).

**26a**: R<sub>f</sub> 0.38 (40:60 EtOAc/petrol).

[α]<sub>D</sub><sup>25</sup> +13.5 (c 0.7, CHCl<sub>3</sub>).

MS (ESI +ve) *m/z* 484 (M + H<sup>+</sup>, 100%).

HRMS (CI +ve) calculated for C<sub>28</sub>H<sub>42</sub>NO<sub>4</sub>Si (M+H<sup>+</sup>) 484.2883, found 484.2892.

IR ν<sub>max</sub> (cm<sup>-1</sup>): 3349, 2922, 2850, 1248, 1069.

<sup>1</sup>H NMR (500 MHz, CDCl<sub>3</sub>) δ 7.39-7.26 (m, 10H, Ar), 4.98 (d, 1H, *J* 11.0 Hz, CHHPh), 4.88 (d, 1H, *J* 11.5 Hz, CHHPh), 4.81 (d, 1H, *J* 11.5 Hz, CHHPh), 4.66 (d, 1H, *J* 11.0 Hz, CHHPh), 3.93-3.89 (m, 1H, H-1), 3.84-3.79 (m, 1H, H-6), 3.44-3.38 (m, 2H, H-7 and H-8), 2.99 (dd, 1H, *J* 10.3, 5.3 Hz, H-5), 2.91 (app. t, 1H, *J* 8.3 Hz, H-3), 2.42 (app. dt, 1H, *J* 9.0, 8.5 Hz, H-3), 2.25-2.17 (m, 1H, H-2), 2.10 (app. t, 1H,

$J$  10.5 Hz, H-5), 1.96 (app. t, 1H,  $J$  7.8 Hz, H-8a), 1.65-1.58 (m, 1H, H-2), 0.90 (s, 9H, *t*-Bu), 0.09 (s, 3H, CH<sub>3</sub>), 0.07 (s, 3H, CH<sub>3</sub>).

<sup>13</sup>C NMR (125 MHz, CDCl<sub>3</sub>)  $\delta$  138.9 (C), 138.3 (C), 128.7 (CH), 128.3 (CH), 128.2 (CH), 128.1 (CH), 127.5 (CH), 127.4 (CH), 88.7 (C-7 or C-8), 81.9 (C-7 or C-8), 75.5 (CH<sub>2</sub>), 75.1 (C-1), 74.8 (CH<sub>2</sub>), 73.3 (C-8a), 72.8 (C-6), 57.5 (C-5), 51.7 (C-3), 32.0 (C-2), 25.8 (C(CH<sub>3</sub>)<sub>3</sub>), 17.9 (C), -4.6 (2xCH<sub>3</sub>).

**(1*S*,5*R*,6*R*,7*R*,7*aR*)-6,7-Bis(benzyloxy)-5-((*tert*-butyldimethylsilyloxy)methyl)hexahydro-1*H*-pyrrolizin-1-ol (29).**

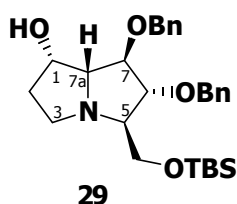

To a solution of 92% diastereomerically pure **26** (0.164 g, 0.34 mmol) in toluene (7 mL) was added triphenylphosphine (0.223 g, 0.85 mmol) and *para*-nitrobenzoic acid (0.142 g, 0.85 mmol). The mixture was stirred and cooled to 0 °C and diisopropyl azodicarboxylate (0.17 mL, 0.85 mmol) was added. The mixture was heated and stirred at 80 °C for 1.5 h. The volatiles were removed in *vacuo* then satd. CuSO<sub>4</sub> solution (20 mL) was added. The reaction mixture was extracted with CH<sub>2</sub>Cl<sub>2</sub> (3 x 20 mL). The combined CH<sub>2</sub>Cl<sub>2</sub> extracts were washed with satd. CuSO<sub>4</sub> solution (20 mL) and water (20 mL), dried (Na<sub>2</sub>CO<sub>3</sub>), filtered and then evaporated to give **28** as a brown oil that was used in the next step without further purification.

**(1*S*,5*R*,6*R*,7*R*,7*aR*)-6,7-Bis(benzyloxy)-5-((*tert*-butyldimethylsilyloxy)methyl)hexahydro-1*H*-pyrrolizin-1-yl 4-nitrobenzoate (28).**

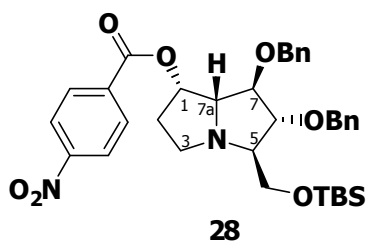

**28:**  $R_f$  0.42 (30:70 EtOAc/petrol).

$[\alpha]_D^{22}$  +39 ( $c$  0.9, CHCl<sub>3</sub>).

MS (ESI +ve)  $m/z$  633 ( $M + H^+$ , 100%).

HRMS (ESI +ve) calculated for  $C_{35}H_{45}N_2O_7Si$  ( $M+H^+$ ) 633.2996, found 633.3007.

IR  $\nu_{max}$  ( $cm^{-1}$ ): 2924, 2858, 1724, 1528, 1270, 1102.

$^1H$  NMR (500 MHz,  $CDCl_3$ )  $\delta$  8.11 (d, 2H,  $J$  8.5 Hz, Ar), 8.07 (d, 2H,  $J$  8.5 Hz, Ar), 7.38-7.16 (m, 10H, Ar), 5.46-5.43 (m, 1H, H-7), 4.65 (d, 1H,  $J$  11.5 Hz,  $CHHPh$ ), 4.62 (d, 1H,  $J$  11.5 Hz,  $CHHPh$ ), 4.55 (d, 1H,  $J$  12.0 Hz,  $CHHPh$ ), 4.46 (d, 1H,  $J$  12.5 Hz,  $CHHPh$ ), 4.20 (app. t, 1H,  $J$  5.0 Hz, H-1), 4.07 (dd, 1H,  $J$  7.8, 5.3 Hz, H-2), 3.78 (dd, 1H,  $J$  10.3, 3.8 Hz, H-8), 3.66 (app. t, 1H,  $J$  4.5 Hz, H-7a), 3.63 (dd, 1H,  $J$  10.5, 7.0 Hz, H-8), 3.30-3.26 (m, 1H, H-5), 3.00 (app. dt, 1H,  $J$  7.5, 4.0 Hz, H-3), 2.90-2.84 (m, 1H, H-5), 2.20-2.16 (m, 2H, 2xH-6), 0.90 (s, 9H, *t*-Bu), 0.08 (s, 3H,  $CH_3$ ), 0.07 (s, 3H,  $CH_3$ ).

$^{13}C$  NMR (125 MHz,  $CDCl_3$ )  $\delta$  163.9 (CO), 150.7 (C), 138.2 (C), 137.7 (C), 135.2 (C), 130.7 (CH), 128.4 (CH), 128.3 (CH), 127.9 (CH), 127.8 (CH), 127.7 (CH), 127.6 (CH), 123.5 (CH), 87.4 (C-2), 82.0 (C-1), 76.5 (C-7), 72.7 ( $CH_2$ ), 72.1 ( $CH_2$ ), 71.8 (C-3), 71.5 (C-7a), 66.1 (C-8), 52.7 (C-5), 34.5 (C-6), 26.0 ( $C(CH_3)_3$ ), 18.3 (C), -5.3 ( $2 \times CH_3$ ).

To a solution of crude **28** (0.34 mmol) in MeOH (7 mL) was added  $K_2CO_3$  (0.075 g, 0.510 mmol). After stirring at rt for 2 h, the mixture was evaporated and dissolved in  $CH_2Cl_2$  (15 mL) and the solution was washed with water (15 mL). The aqueous layer was extracted further with  $CH_2Cl_2$  (3x10 mL) and the combined  $CH_2Cl_2$  extracts were washed with brine, dried ( $Na_2CO_3$ ) and evaporated. The residue was purified by FCC (50:50 EtOAc/petrol to 100% EtOAc) to give diastereomerically pure **29** as a yellow oil (93 mg, 57%).  $R_f$  0.30 (80:20 EtOAc/petrol).

$[\alpha]_D^{22}$  -2.3 ( $c$  1.8,  $CHCl_3$ ).

MS (ESI +ve)  $m/z$  484 ( $M + H^+$ , 100%).

HRMS (ESI +ve) calculated for  $C_{28}H_{42}NO_4Si$  ( $M+H^+$ ) 484.2883, found 484.2873.

IR  $\nu_{max}$  ( $cm^{-1}$ ): 3402, 2923, 2850, 1256, 1100, 1047.

$^1H$  NMR (500 MHz,  $CDCl_3$ )  $\delta$  7.36-7.28 (m, 10H, Ar), 4.63 (d, 1H,  $J$  12.0 Hz,  $CHHPh$ ), 4.59 (d, 1H,  $J$  12.0 Hz,  $CHHPh$ ), 4.56 (d, 1H,  $J$  12.0 Hz,  $CHHPh$ ), 4.52 (d, 1H,  $J$  11.5 Hz,  $CHHPh$ ), 4.27 (app. t, 1H,  $J$  3.0 Hz, H-1), 4.16-4.14 (m, 1H, H-7), 4.11 (app. t, 1H,  $J$  3.0 Hz, H-2), 3.67-3.57 (m, 3H, H-7a and 2xH-8), 3.22 (app. t, 1H,

$J$  8.5 Hz, H-5), 3.04 (dd, 1H,  $J$  11.3, 7.3 Hz, H-3), 2.86-2.80 (m, 1H, H-5), 196-1.87 (m, 2H, 2xH-6), 0.87 (s, 9H, *t*-Bu), 0.02 (s, 3H, CH<sub>3</sub>), 0.01 (s, 3H, CH<sub>3</sub>).

<sup>13</sup>C NMR (125 MHz, CDCl<sub>3</sub>)  $\delta$  138.2 (C), 137.6 (C), 128.5 (CH), 128.4 (CH), 127.84 (CH), 127.8 (CH), 127.7 (CH), 127.6 (CH), 85.4 (C-2), 81.9 (C-1), 74.0 (C-7a), 72.3 (C-3), 71.94 (C-7), 71.9 (CH<sub>2</sub>), 71.8 (CH<sub>2</sub>), 65.1 (C-8), 53.2 (C-5), 36.9 (C-6), 26.0 (C(CH<sub>3</sub>)<sub>3</sub>), 18.2 (C), -5.3 (CH<sub>3</sub>), -5.4 (CH<sub>3</sub>).

**(1*R*,2*R*,3*R*,7*S*,7*aR*)-3-Hydroxymethyl-hexahydro-1*H*-pyrrolizine-1,2,7-triol (australine) (3).**

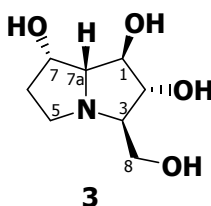

To a solution of **29** (74.6 mg, 0.155 mmol) in MeOH (3 mL) was added PdCl<sub>2</sub> (41.1 mg, 0.232 mmol). The mixture was stirred at rt under an atmosphere of H<sub>2</sub> (balloon) for 3 h, follow by the dropwise addition of conc. HCl (10 drops) and stirring was continued at rt for 21 h. The mixture was filtered through a celite pad and the solids were washed with MeOH. The combined filtrates were evaporated *in vacuo* and the residue was dissolved in water (2 mL) and applied to a column of Amberlyst (OH<sup>-</sup>) A-26 resin (4 cm). Elution with water followed by evaporation *in vacuo* gave australine **3** as a yellow oil (25.1 mg, 86%).

$[\alpha]_D^{22} +9.4$  (*c* 2.4, H<sub>2</sub>O). [Lit.<sup>5</sup>;  $[\alpha]_D^{25} +8^\circ$  (*c* 0.35, H<sub>2</sub>O).

MS (ESI +ve)  $m/z$  190 (M + H<sup>+</sup>, 100%).

HRMS (EI) calculated for C<sub>8</sub>H<sub>15</sub>NO<sub>4</sub> (M<sup>+</sup>) 189.1001, found 189.0994.

IR  $\nu_{\max}$  (cm<sup>-1</sup>): 3318, 2944, 2873, 2484, 1388, 1332, 1123, 1041.

<sup>1</sup>H NMR (500 MHz, D<sub>2</sub>O)  $\delta$  4.37-4.35 (m, 1H, H-7), 4.22 (t, 1H,  $J_{1,2} = J_{1,7a} = 7.8$  Hz, H-1), 3.89 (dd, 1H,  $J_{2,3} = 9.5$ ,  $J_{1,2} = 8.0$  Hz, H-2), 3.79 (dd, 1H,  $J_{8,8'} = 12.0$  Hz,  $J_{3,8} = 3.5$  Hz, H-8), 3.61 (dd, 1H,  $J_{8,8'} = 11.5$  Hz,  $J_{3,8'} = 7.0$  Hz, H-8'), 3.17 (dd, 1H,  $J_{1,7a} = 7.8$  Hz,  $J_{7,7a} = 4.8$  Hz, H-7a), 3.15-3.12 (m, 1H, H-5), 2.74-2.69 (m, 2H, H-3 and H-5), 2.05-2.00 (m, 1H, H-6), 1.97-1.89 (m, 1H, H-6).

<sup>13</sup>C NMR (125 MHz, D<sub>2</sub>O)  $\delta$  79.5 (C-2), 73.7 (C-1), 71.3 (C-7a), 71.1 (C-3), 70.1 (C-7), 63.5 (C-8), 52.4 (C-5), 35.8 (C-6).

**3•HCl salt:** <sup>1</sup>H NMR (500 MHz, D<sub>2</sub>O)  $\delta$  4.72-4.69 (m, 1H, H-7), 4.51 (app. t, 1H,  $J = 7.5$  Hz, H-1), 4.18 (dd, 1H,  $J = 10.0$ , 8.0 Hz, H-2), 4.02 (dd, 1H,  $J = 13.0$ , 2.5 Hz, H-

8), 3.95-3.92 (m, 1H, H-7a), 3.92 (dd, 1H,  $J = 13.8, 4.3$  Hz, H-8), 3.84 (app. brt, 1H,  $J = 9.8$  Hz, H-5), 3.45-3.38 (m, 2H, H-5 and H-3), 2.36-2.31 (m, 1H, H-6), 2.05-2.00 (m, 1H, H-6), 2.29-2.27 (m, 1H, H-6).

$^{13}\text{C}$  NMR (125 MHz,  $\text{D}_2\text{O}$ )  $\delta$  76.2 (C-2), 73.3 (C-7a), 72.1 (C-1), 71.4 (C-3), 68.7 (C-7), 56.5 (C-8), 52.9 (C-5), 35.0 (C-6).

5. Pearson, W. H.; Hines, J. V., *J. Org. Chem.* **2000**, *65*, 5785-5793.

**Table 3** Physical and spectral Data for (+)-Australine<sup>6, 7, 8, 9</sup> and **3**.

|                     | Natural Product                                                               | Synthetic                                                          |                                                              |
|---------------------|-------------------------------------------------------------------------------|--------------------------------------------------------------------|--------------------------------------------------------------|
|                     |                                                                               | Denmark <sup>9</sup>                                               | <b>3</b> (This work)                                         |
| Physical Appearance | Colourless prisms <sup>6</sup>                                                | Yellow oil                                                         | Yellow oil                                                   |
| Optical Rotation    | $[\alpha]_D^{26} +19.3^\circ$ (c 2.09, MeOH) <sup>6</sup>                     | $[\alpha]_D^{25} +8^\circ$ (c 0.35, H <sub>2</sub> O) <sup>5</sup> | $[\alpha]_D^{22} +9.4$ (c 2.4, H <sub>2</sub> O)             |
| Melting Point       | 148-149 °C <sup>6</sup>                                                       | -                                                                  | -                                                            |
| <sup>1</sup> H NMR  | 500 MHz, D <sub>2</sub> O, pH = 8.6 <sup>7</sup>                              | 500 MHz, D <sub>2</sub> O                                          | 500 MHz, D <sub>2</sub> O                                    |
|                     | 4.43 (ddd, 1H, $J_{7,7a} = 4.4$ , $J_{6,7} = 4.2$ , $J_{6,7} = 2.4$ Hz, H-7)  | 4.19 (dt, 1H, $J_d = 2.2$ , $J_t = 4.2$ Hz, H-7)                   | 4.37-4.35 (m, 1H, H-7)                                       |
|                     | 4.29 (dd, 1H, $J_{1,2} = 8.2$ , $J_{1,7a} = 7.4$ Hz, H-1)                     | 4.04 (t, 1H, $J = 7.8$ Hz, H-1)                                    | 4.22 (t, 1H, $J_{1,2} = J_{1,7a} = 7.8$ Hz, H-1)             |
|                     | 3.96 (dd, 1H, $J_{2,3} = 9.5$ , $J_{1,2} = 8.2$ Hz, H-2)                      | 3.71 (dd, 1H, $J = 9.5$ , 8.3 Hz, H-2)                             | 3.89 (dd, 1H, $J_{2,3} = 9.5$ , $J_{1,2} = 8.0$ Hz, H-2)     |
|                     | 3.85                                                                          | 3.60 (AB <sub>x</sub> , dd, 1H, $J = 12.0$ , 3.7 Hz, H-8)          | 3.79 (dd, 1H, $J_{8,8'} = 12.0$ , $J_{3,8} = 3.5$ Hz, H-8)   |
|                     | 3.68                                                                          | 3.43 (AB <sub>x</sub> , dd, 1H, $J = 12.0$ , 6.6 Hz, H-8')         | 3.61 (dd, 1H, $J_{8,8'} = 11.5$ , $J_{3,8'} = 7.0$ Hz, H-8') |
|                     | 3.27 (dd, 1H, $J_{1,7a} = 7.4$ , $J_{7,7a} = 4.4$ Hz, H-7a)                   | 3.02 (dd, 1H, $J = 7.6$ , 4.4 Hz, H-7a)                            | 3.17 (dd, 1H, $J_{1,7a} = 7.8$ , $J_{7,7a} = 4.8$ Hz, H-7a)  |
|                     | 3.23 (dd, 1H, $J_{5,6} = 11.5$ , $J_{5,6} = 6.0$ Hz, H-5a)                    | 2.98 (ddd, 1H, $J = 9.8$ , 7.6, 2.2 Hz, H-5)                       | 3.15-3.12 (m, 1H, H-5)                                       |
|                     | 2.80 (m, 2H, H-3 and H-5b)                                                    | 2.58-2.52 (m, 2H, H-3 and H-5)                                     | 2.74-2.69 (m, 2H, H-3 and H-5)                               |
|                     | 2.10 (ddd, 1H, $J_{5,6} = 6.0$ , $J_{6,7} = 2.4$ , $J_{5,6} = 2.1$ Hz, H-6a)  | 1.87-1.82 (m, 1H, H-6)                                             | 2.05-2.00 (m, 1H, H-6)                                       |
|                     | 2.00 (ddd, 1H, $J_{5,6} = 11.5$ , $J_{5,6} = 7.5$ , $J_{6,7} = 4.2$ Hz, H-6b) | 1.79-1.71 (m, 1H, H-6).                                            | 1.97-1.89 (m, 1H, H-6).                                      |

**Table 3** continued

|                     | <b>Natural Product</b> <sup>8</sup><br>(Original assignment<br>/ reassignment) | <b>Synthetic</b>                         |                                           |                                                |
|---------------------|--------------------------------------------------------------------------------|------------------------------------------|-------------------------------------------|------------------------------------------------|
|                     |                                                                                | Denmark <sup>9</sup>                     | Pearson <sup>5*</sup>                     | <b>3</b> (This work)                           |
| <sup>13</sup> C NMR | 125 MHz, D <sub>2</sub> O<br>(ref TSP δ 0.0)                                   | 100 MHz, D <sub>2</sub> O<br>(not given) | 90 MHz, D <sub>2</sub> O<br>(ref dioxane) | 125 MHz, D <sub>2</sub> O<br>(ref MeCN δ 1.47) |
|                     | 81.8 (C-7 / C-2)                                                               | 78.4 (C-2)                               | 79.5                                      | 79.5 (C-2)                                     |
|                     | 75.9 (C-1)                                                                     | 72.7 (C-1)                               | 73.9                                      | 73.7 (C-1)                                     |
|                     | 73.5 (C-2 / C-7a)                                                              | 70.5 (C-7a)                              | 71.7                                      | 71.3 (C-7a)                                    |
|                     | 73.3 (C-3)                                                                     | 70.2 (C-3)                               | 71.4                                      | 71.1 (C-3)                                     |
|                     | 72.3 (C-7a / C-7)                                                              | 69.1 (C-7)                               | 70.3                                      | 70.1 (C-7)                                     |
|                     | 65.5 (C-8)                                                                     | 62.2 (C-8)                               | 63.1                                      | 63.5 (C-8)                                     |
|                     | 54.6 (C-5)                                                                     | 51.6 (C-5)                               | 52.7                                      | 52.4 (C-5)                                     |
|                     | 38.0 (C-6)                                                                     | 34.9 (C-6)                               | 35.9                                      | 35.8 (C-6)                                     |

\* Signals were not assigned.

5. Pearson, W. H.; Hines, J. V., *J. Org. Chem.* **2000**, *65*, 5785-5793.

6. Molyneux, R. J.; Benson, M.; Wong, R. Y.; *J. Nat. Prod.* **1988**, *51*, 1198-1206.

7. Wormald, M. R.; Nash, R. J.; Hrnčiar, P.; White, J. D.; Molyneux, R. J.; Fleet, G. W. J., *Tetrahedron: Asym.* **1998**, *9*, 2549-2558.

8. Kato, A.; Kano, E.; Adachi, I.; Molyneux, R. J.; Watson, A. A.; Nash, R. J.; Fleet, G. W. J.; Wormald, M. R.; Kizu, H.; Ikeda, K.; Asano, N., *Tetrahedron: Asym.* **2003**, *14*, 325-331.

9. Denmark, S. E.; Martinborough, E. A., *J. Am. Chem. Soc.* **1999**, *121*, 3046-3056.

**(2*R*,3*R*,4*R*)-3,4-Bis(benzyloxy)-4-((1*S*,2*S*,5*R*)-6-oxa-3-azabicyclo[3.1.0]hexan-2-yl)-1-(*tert*-butyldimethylsilyloxy)butan-2-ol (30).**

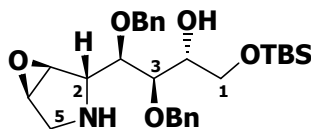

**30**

To a solution of **19** (0.095 g, 0.131 mmol) in toluene (2 mL) was added triphenylphosphine (0.086 g, 0.328 mmol) and *para*-nitrobenzoic acid (0.055 g, 0.328 mmol). The mixture was cooled to 0 °C and diisopropyl azodicarboxylate (64.5  $\mu$ L, 0.28 mmol) was added. The mixture was stirred at rt for 5 h. The volatiles were removed in *vacuo* then satd. CuSO<sub>4</sub> solution (20 mL) was added. The reaction mixture was extracted with CH<sub>2</sub>Cl<sub>2</sub> (3 x 10 mL). The combined CH<sub>2</sub>Cl<sub>2</sub> extracts were washed with water (5 mL), dried (Na<sub>2</sub>CO<sub>3</sub>), filtered and then evaporated to give **30a** as a pale yellow oil that was used in the next step without further purification.

**(1*S*,2*S*,5*R*)-(9*H*-Fluoren-9-yl)methyl 2-((1*R*,2*S*,3*R*)-1,2-bis(benzyloxy)-4-(*tert*-butyldimethylsilyloxy)-3-(4-nitrobenzyloxy)butyl)-6-oxa-3-azabicyclo[3.1.0]hexane-3-carboxylate (30a).**

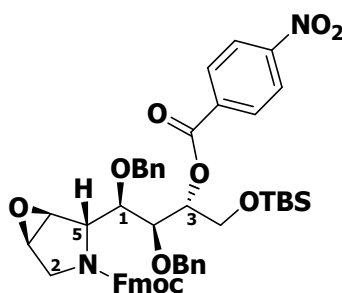

**30a**

**30a:** R<sub>f</sub> 0.41 (30:70 EtOAc/petrol).

[ $\alpha$ ]<sub>D</sub><sup>22</sup> +35 (*c* 2.6, CHCl<sub>3</sub>).

MS (ESI +ve) *m/z* 870 (M + H<sup>+</sup>, 100%).

HRMS (ESI +ve) calculated for C<sub>50</sub>H<sub>55</sub>N<sub>2</sub>O<sub>10</sub>Si (M+H<sup>+</sup>) 871.3626, found 871.3611.

IR  $\nu_{\max}$  (cm<sup>-1</sup>): 2950, 2940, 2857, 1720, 1701, 1529, 1271, 1101.

<sup>1</sup>H NMR (500 MHz, CDCl<sub>3</sub>)  $\delta$  (major rotamer) 8.29-8.23 (m, 2H, Ar), 7.79-7.57 (m, 2H, Ar), 7.42-7.20 (m, 18H, Ar), 5.45 (dd, 1H, *J* 9.0, 5.5 Hz, H-3'), 4.91 (d, 1H, *J* 11.0 Hz, CHHPh), 4.84 (d, 1H, *J* 11.5 Hz, CHHPh), 4.60 (d, 1H, *J* 11.0 Hz, CHHPh), 4.45 (d, 2H, *J* 6.5 Hz, CH<sub>2</sub> (Fmoc)), 4.37 (d, 1H, *J* 11.5 Hz, CHHPh), 4.28-4.14 (m, 5H, H-1' or H-2', H-3 or H-4, 2xH-4' and CH (Fmoc)), 4.07 (d, 1H, *J* 3.0 Hz, H-3 or



H-4), 3.78 (brs, 1H, H-1' or H-2'), 3.76 (d, 1H, *J* 12.0, Hz, H-5), 3.68 (brd, 1H, *J* 2.0 Hz, H-2), 3.25 (d, 1H, *J* 11.5 Hz, H-5), 0.91 (s, 9H, *t*-Bu), 0.08 (s, 3H, CH<sub>3</sub>), 0.07 (s, 3H, CH<sub>3</sub>).

<sup>13</sup>C NMR (125 MHz, CDCl<sub>3</sub>) δ (major rotamer) 163.9 (CO), 154.8 (CO), 150.5 (C), 143.8 (C), 143.5 (C), 141.2 (C), 141.1 (C), 137.6 (C), 137.4 (C), 135.2 (C), 130.7 (CH), 128.4 (CH), 128.3 (CH), 128.1 (CH), 128.0 (CH), 127.9 (CH), 127.8 (CH), 127.7 (CH), 127.5 (CH), 127.0 (CH), 126.9 (CH), 124.7 (CH), 123.4 (CH), 119.9 (CH), 80.7 (C-1'), 79.0 (C-2'), 75.8 (C-3'), 74.5 (CH<sub>2</sub>), 74.8 (CH<sub>2</sub>), 67.0 (CH<sub>2</sub> (Fmoc)), 61.8 (C-2), 60.5 (C-4'), 56.4 (C-3 or C-4), 55.7 (C-3 or C-4), 47.6 (C-5), 47.1 (CH (Fmoc)), 25.7 (C(CH<sub>3</sub>)<sub>3</sub>), 18.0 (C), -5.4 (CH<sub>3</sub>), -5.5 (CH<sub>3</sub>).

To a solution of crude **30a** (0.131 mmol) in MeOH (2 mL) was added K<sub>2</sub>CO<sub>3</sub> (0.015 g, 0.109 mmol). After stirring at rt for 1 day, the mixture was evaporated and dissolved in CH<sub>2</sub>Cl<sub>2</sub>. The solution was washed with water (5 mL) and the aqueous layer was extracted with CH<sub>2</sub>Cl<sub>2</sub> (3x10 mL). The combined CH<sub>2</sub>Cl<sub>2</sub> extracts were washed with brine, dried (Na<sub>2</sub>CO<sub>3</sub>) and evaporated. The residue was purified by FCC (50:50 EtOAc/petrol to 100% EtOAc) to give **30** as a yellow oil (36 mg, 55%). *R*<sub>f</sub> 0.08 (30:70 EtOAc/petrol).

[α]<sub>D</sub><sup>23</sup> +53 (*c* 2.8, CHCl<sub>3</sub>).

MS (ESI +ve) *m/z* 500 (M + H<sup>+</sup>, 100%).

HRMS (ESI +ve) calculated for C<sub>28</sub>H<sub>42</sub>NO<sub>5</sub>Si (M+H<sup>+</sup>) 500.2832, found 500.2836.

IR ν<sub>max</sub> (cm<sup>-1</sup>): 3362, 2930, 1449, 1250, 1100.

<sup>1</sup>H NMR (500 MHz, CDCl<sub>3</sub>) δ 7.33-7.25 (m, 10H, Ar), 4.86 (d, 1H, *J* 11.0 Hz, CHHPh), 4.71 (d, 1H, *J* 11.5 Hz, CHHPh), 4.62 (d, 1H, *J* 11.0 Hz, CHHPh), 4.57 (d, 1H, *J* 11.0 Hz, CHHPh), 3.81 (brs, 3H, H-2', H-3' and H-4'), 3.73 (dd, *J* 9.5, 3.5 Hz, 1H, H-4'), 3.67 (d, 1H, *J* 2.5 Hz, H-3 or H-4), 3.55 (dd, 1H, *J* 9.5, 2.0 Hz, H-1') 3.42 (d, 1H, *J* 9.5 Hz, H-2), 3.39 (d, 1H, *J* 2.5 Hz, H-3 or H-4), 3.02 (d, 1H, *J* 13.5 Hz, H-5), 2.70 (d, 1H, *J* 13.0 Hz, H-5), 0.91 (s, 9H, *t*-Bu), 0.08 (s, 6H, 2xCH<sub>3</sub>).

<sup>13</sup>C NMR (125 MHz, CDCl<sub>3</sub>) δ 138.3 (C), 138.2 (C), 128.4 (CH), 128.3 (CH), 128.22 (CH), 128.2 (CH), 128.1 (CH), 128.0 (CH), 127.8 (CH), 127.7 (CH), 79.4 (C-2'), 78.5 (C-1'), 74.52 (CH<sub>2</sub>), 74.5 (CH<sub>2</sub>), 71.7 (C-3'), 64.4 (C-4'), 59.9 (C-2), 58.0 (C-3 or C-4), 55.8 (C-3 or C-4), 46.9 (C-5), 25.9 (C(CH<sub>3</sub>)<sub>3</sub>), 18.3 (C), -5.28 (CH<sub>3</sub>), -5.3 (CH<sub>3</sub>).

(1*aR*,4*S*,5*R*,6*R*,6*bS*)-5,6-Bis(benzyloxy)-4-((*tert*-butyldimethylsilyloxy)methyl)hexahydro-1*aH*-oxireno[2,3-*a*]pyrrolizine (**31**) and (1*aR*,5*R*,6*S*,7*R*,7*aS*,7*bS*)-6,7-bis(benzyloxy)-5-(*tert*-butyldimethylsilyloxy)octahydrooxireno[2,3-*a*]indolizine (**32**).

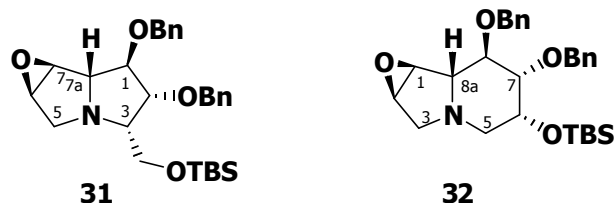

To a solution of **30** (0.500 g, 1.002 mmol) in toluene (10 mL) was added triphenylphosphine (0.657 g, 2.505 mmol). The mixture was cooled to 0 °C and diisopropyl azodicarboxylate (0.49 mL, 2.505 mmol) was added. The mixture was heated and stirred at 80 °C for 12 h. The volatiles were removed in *vacuo* then satd. CuSO<sub>4</sub> solution (20 mL) was added. The reaction mixture was extracted with CH<sub>2</sub>Cl<sub>2</sub> (3 x 25 mL). The combined CH<sub>2</sub>Cl<sub>2</sub> extracts were washed with water (20 mL), dried (Na<sub>2</sub>CO<sub>3</sub>), filtered and then evaporated. The residue was purified by FCC (50:50 EtOAc/petrol to 100% EtOAc) to give to give **31** as a yellow oil (0.337 g, 70%) and **32** as a yellow oil (0.02 g, 4%).

**31**: R<sub>f</sub> 0.26 (70:30 EtOAc/petrol).

[α]<sub>D</sub><sup>25</sup> +43 (c 1.6, CHCl<sub>3</sub>).

MS (ESI +ve) *m/z* 482 (M + H<sup>+</sup>, 100%).

HRMS (ESI +ve) calculated for C<sub>28</sub>H<sub>40</sub>NO<sub>4</sub>Si (M+H<sup>+</sup>) 482.2727, found 482.2717.

IR ν<sub>max</sub> (cm<sup>-1</sup>): 2952, 2930, 2850, 1447, 1250, 1095.

<sup>1</sup>H NMR (500 MHz, CDCl<sub>3</sub>) δ 7.38-7.25 (m, 10H, Ar), 4.55 (d, 1H, *J* 12.0 Hz, CHHPh), 4.53 (d, 1H, *J* 12.0 Hz, CHHPh), 4.51 (d, 1H, *J* 11.5 Hz, CHHPh), 4.48 (d, 1H, *J* 12.0 Hz, CHHPh), 4.09 (d, 1H, *J* 4.0 Hz, H-2), 3.99 (app. t, 1H, *J* 9.3 Hz, H-8), 3.91 (dd, 1H, *J* 10.0, 5.0 Hz, H-8), 3.80 (d, 1H, *J* 4.5 Hz, H-1), 3.68-3.66 (m, 2H, H-6 or H-7 and H-7a), 3.60 (d, 1H, *J* 2.0 Hz, H-6 or H-7), 3.39 (app. dt, 1H, *J* 8.5, 4.3 Hz, H-3), 3.19 (d, 1H, *J* 10.5 Hz, H-5), 3.03 (d, 1H, *J* 11.5 Hz, H-5), 0.09 (s, 9H, *t*-Bu), 0.06 (s, 6H, 2xCH<sub>3</sub>).

<sup>13</sup>C NMR (125 MHz, CDCl<sub>3</sub>) δ 138.3 (C), 137.6 (C), 128.5 (CH), 128.3 (CH), 127.9 (CH), 127.6 (CH), 127.5 (CH), 127.3 (CH), 86.9 (C-2), 85.3 (C-1), 72.2 (CH<sub>2</sub>), 71.9 (C-7a), 71.7 (CH<sub>2</sub>), 65.7 (C-3), 58.5 (C-8), 57.6 (C-6 or C-7), 57.3 (C-6 or C-7), 48.1 (C-5), 25.9 (C(CH<sub>3</sub>)<sub>3</sub>), 18.2 (C), -5.4 (CH<sub>3</sub>), -5.5 (CH<sub>3</sub>).

**32:**  $R_f$  0.25 (70:30 EtOAc/petrol).

$^1\text{H}$  NMR (500 MHz,  $\text{CDCl}_3$ )  $\delta$  7.78-7.26 (m, 10H, Ar), 4.97 (d, 1H,  $J$  11.5 Hz,  $\text{CHHPh}$ ), 4.73 (d, 1H,  $J$  11.5 Hz,  $\text{CHHPh}$ ), 4.65 (d, 2H,  $J$  11.5 Hz,  $2\times\text{CHHPh}$ ), 4.15 (m, 1H, H-6), 3.63 (app. t, 1H,  $J$  7.8 Hz, H-8), 3.55 (d, 1H,  $J$  3.0 Hz, H-1 or H-2), 3.52 (d, 1H,  $J$  10.5 Hz, H-3), 3.45 (d, 1H,  $J$  3.0 Hz, H-1 or H-2), 3.38 (dd, 1H,  $J$  10.0, 3.0 Hz, H-7), 3.20 (d, 1H,  $J$  10.5 Hz, H-3), 3.15 (d, 1H,  $J$  9.5 Hz, H-8a), 2.96 (dd, 1H,  $J$  15.0, 1.5 Hz, H-5), 2.86 (brd, 1H,  $J$  15.0 Hz, H-5), 0.91 (s, 9H,  $t\text{-Bu}$ ), 0.10 (s, 3H,  $\text{CH}_3$ ), 0.07 (s, 3H,  $\text{CH}_3$ ).

$^{13}\text{C}$  NMR (125 MHz,  $\text{CDCl}_3$ )  $\delta$  138.5 (C), 138.3 (C), 133.2 (CH), 133.0 (CH), 128.6 (CH), 128.4 (CH), 128.2 (CH), 127.8 (CH), 127.6 (CH), 127.5 (CH), 84.1 (C-7), 75.0 ( $\text{CH}_2$ ), 72.7 (C-8), 72.2 ( $\text{CH}_2$ ), 71.3 (C-6), 61.8 (C-8a), 57.8 (C-1 or C-2), 54.7 (C-1 or C-2), 52.0 (C-3), 50.3 (C-5), 28.6 ( $\text{C}(\text{CH}_3)_3$ ), 18.2 (C), -4.6 ( $\text{CH}_3$ ), -4.7 ( $\text{CH}_3$ ).

**(1*R*,5*S*,6*R*,7*R*,7*aR*)-6,7-Bis(benzyloxy)-5-((*tert*-butyldimethylsilyloxy)methyl)hexahydro-1*H*-pyrrolizin-1-ol (33) and (2*S*,5*S*,6*R*,7*R*,7*aR*)-6,7-bis(benzyloxy)-5-((*tert*-butyldimethylsilyloxy)methyl)hexahydro-1*H*-pyrrolizin-2-ol (34).**

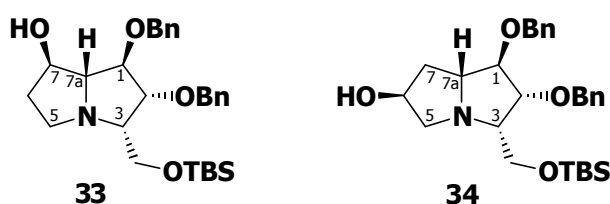

To a solution of crude **31** (0.037 mg, 0.098 mmol) in anhydrous THF (2 mL) was added dropwise a solution of lithium aluminium hydride (1M in THF, 0.1 mL, 0.1 mmol). The mixture was stirred at rt for 12 h. The solvent was evaporated and the mixture was chromatographed on silica gel by FCC (80:20 EtOAc/petrol to 10:90 MeOH/EtOAc) to give **33** as a pale yellow oil (15.3 mg, 41%) and **34** (3.3 mg, 9%) as a pale yellow oil.

**33:**  $R_f$  0.31 (5:95 MeOH/EtOAc).

$[\alpha]_D^{22}$  -4 ( $c$  1.4,  $\text{CHCl}_3$ ).

MS (ESI +ve)  $m/z$  484 ( $\text{M} + \text{H}^+$ , 100%).

HRMS (ESI +ve) calculated for  $\text{C}_{28}\text{H}_{42}\text{NO}_4\text{Si}$  ( $\text{M} + \text{H}^+$ ) 484.2883, found 484.2868.

IR  $\nu_{\text{max}}$  ( $\text{cm}^{-1}$ ): 3390, 2923, 2858, 1260, 1095.

$^1\text{H}$  NMR (500 MHz,  $\text{CDCl}_3$ )  $\delta$  7.34-7.25 (m, 10H, Ar), 4.59 (d, 1H,  $J$  11.5 Hz,  $\text{CHHPh}$ ), 4.57 (d, 1H,  $J$  10.5 Hz,  $\text{CHHPh}$ ), 4.52 (d, 1H,  $J$  12.0 Hz,  $\text{CHHPh}$ ), 4.48 (d, 1H,  $J$  11.5 Hz,  $\text{CHHPh}$ ), 4.16 (app. dt, 1H,  $J$  6.5, 5.5 Hz, H-7), 4.04 (dd, 1H,  $J$  4.5, 2.0 Hz, H-2), 3.95 (dd, 1H,  $J$  10.0, 7.3 Hz, H-8), 3.89-3.86 (m, 2H, H-1 and H-8), 3.35 (app. dt, 1H,  $J$  6.5, 4.8 Hz, H-3), 3.30 (app. t, 1H,  $J$  4.5 Hz, H-7a), 3.09 (ddd, 1H,  $J$  9.3, 7.0, 6.5 Hz, H-5), 2.91-2.87 (m, 1H, H-5), 2.19-2.13 (m, 1H, H-6), 1.84-1.78 (m, 1H, H-6), 0.88 (s, 9H,  $t\text{-Bu}$ ), 0.40 (s, 6H,  $2\times\text{CH}_3$ ).

$^{13}\text{C}$  NMR (125 MHz,  $\text{CDCl}_3$ )  $\delta$  138.4 (C), 138.1 (C), 128.4 (CH), 128.3 (CH), 127.7 (CH), 127.6 (CH), 127.5 (CH), 127.3 (CH), 85.9 (C-1), 85.6 (C-2), 77.7 (C-7a), 75.6 (C-7), 72.1 ( $\text{CH}_2$ ), 71.4 ( $\text{CH}_2$ ), 65.3 (C-3), 58.8 (C-8), 46.1 (C-5), 35.6 (C-6), 25.9 ( $\text{C}(\text{CH}_3)_3$ ), 18.3 (C), -5.4 ( $\text{CH}_3$ ), -5.5 ( $\text{CH}_3$ ).

**34:**  $R_f$  0.11 (5:95 MeOH/EtOAc).

$[\alpha]_D^{25} +10.3$  ( $c$  1.1,  $\text{CHCl}_3$ ).

MS (ESI +ve)  $m/z$  484 ( $\text{M} + \text{H}^+$ , 100%).

HRMS (ESI +ve) calculated for  $\text{C}_{28}\text{H}_{42}\text{NO}_4\text{Si}$  ( $\text{M} + \text{H}^+$ ) 484.2883, found 484.2863.

IR  $\nu_{\text{max}}$  ( $\text{cm}^{-1}$ ): 3236, 2952, 2923, 1250, 1096.

$^1\text{H}$  NMR (500 MHz,  $\text{CDCl}_3$ )  $\delta$  7.36-7.24 (m, 10H, Ar), 4.56 (d, 1H,  $J$  12.0 Hz,  $\text{CHHPh}$ ), 4.53 (d, 1H,  $J$  12.0 Hz,  $\text{CHHPh}$ ), 4.48 (d, 1H,  $J$  12.0 Hz,  $\text{CHHPh}$ ), 4.45 (d, 1H,  $J$  12.0 Hz,  $\text{CHHPh}$ ), 4.43 (brt, 1H,  $J$  4.0 Hz, H-6), 4.10 (dd, 1H,  $J$  4.5, 2.0 Hz, H-2), 3.91 (d, 2H,  $J$  6.0 Hz,  $2\times\text{H-8}$ ), 3.88-3.83 (m, 2H, H-1 and H-7a), 3.54 (app. dt, 1H,  $J$  6.0, 5.0 Hz, H-3), 3.23 (dd, 1H,  $J$  10.0, 3.5 Hz, H-5), 2.96 (d, 1H,  $J$  10.0 Hz, H-5), 2.18 (dd, 1H,  $J$  13.0, 7.3 Hz, H-7), 1.86-1.81 (m, 1H, H-7), 0.89 (s, 9H,  $t\text{-Bu}$ ), 0.05 (s, 6H,  $2\times\text{CH}_3$ ).

$^{13}\text{C}$  NMR (125 MHz,  $\text{CDCl}_3$ )  $\delta$  138.0 (C), 137.9 (C), 128.5 (CH), 128.4 (CH), 127.8 (CH), 127.7 (CH), 127.6 (CH), 127.4 (CH), 86.8 (C-1), 85.7 (C-2), 73.7 (C-6), 72.4 ( $\text{CH}_2$ ), 71.5 ( $\text{CH}_2$ ), 68.7 (C-7a), 64.5 (C-3), 58.5 (C-8), 56.2 (C-5), 39.5 (C-7), 25.9 ( $\text{C}(\text{CH}_3)_3$ ), 18.3 (C), -5.4 ( $\text{CH}_3$ ), -5.5 ( $\text{CH}_3$ ).

**(1*S*,5*S*,6*R*,7*R*,7*aR*)-6,7-Bis(benzyloxy)-5-((*tert*-butyldimethylsilyloxy)methyl)hexahydro-1*H*-pyrrolizin-1-ol (35).**

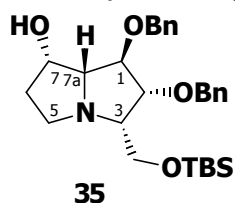

To a solution of **33** (0.040 g, 0.083 mmol) in toluene (2 mL) was added triphenylphosphine (0.055 g, 0.021 mmol) and *para*-nitrobenzoic acid (0.035 g, 0.021 mmol). The mixture was stirred at 0 °C and diisopropyl azodicarboxylate (41.1  $\mu$ L, 0.021 mmol) was added. The mixture was stirred at rt for 8 h. The volatiles were removed in *vacuo* then satd. CuSO<sub>4</sub> solution (20 mL) was added. The reaction mixture was extracted with CH<sub>2</sub>Cl<sub>2</sub> (3 x 10 mL). The combined CH<sub>2</sub>Cl<sub>2</sub> extracts were washed with water (5 mL), dried (Na<sub>2</sub>CO<sub>3</sub>), filtered and then evaporated to give **35a** as a brown oil that was used in the next step without further purification.

**(1*S*,5*S*,6*R*,7*R*,7*aR*)-6,7-Bis(benzyloxy)-5-((*tert*-butyldimethylsilyloxy)methyl)hexahydro-1*H*-pyrrolizin-1-yl 4-nitrobenzoate (35a).**

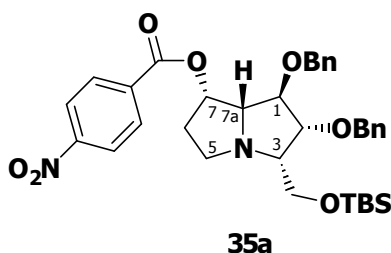

**35a:** *R<sub>f</sub>* 0.39 (50:50 EtOAc/petrol).

$[\alpha]_D^{26} +31$  (*c* 3.0, CHCl<sub>3</sub>).

MS (ESI +ve) *m/z* 633 (*M* + H<sup>+</sup>, 70%).

HRMS (ESI +ve) calculated for C<sub>35</sub>H<sub>45</sub>N<sub>2</sub>O<sub>7</sub>Si (*M*+H<sup>+</sup>) 633.2996, found 633.2986.

IR  $\nu_{\max}$  (cm<sup>-1</sup>): 2926, 2853, 1726, 1528, 1272, 1096.

<sup>1</sup>H NMR (500 MHz, CDCl<sub>3</sub>)  $\delta$  7.95 (s, 4H, Ar), 7.37-7.12 (m, 10H, Ar), 5.63 (app. t, 1H, *J* 5.8 Hz, H-7), 4.56 (d, 1H, *J* 12.0 Hz, CHHPh), 4.51 (d, 1H, *J* 12.0 Hz, CHHPh), 4.49 (d, 1H, *J* 13.0 Hz, CHHPh), 4.47 (d, 1H, *J* 13.5 Hz, CHHPh), 4.13 (dd, 1H, *J* 4.5, 1.5 Hz, H-2), 4.07 (dd, 1H, *J* 10.3, 7.3 Hz, H-8), 4.05 (dd, 1H, *J* 4.3, 2.3 Hz, H-1), 4.00 (dd, 1H, *J* 10.3, 6.8 Hz, H-8), 3.68 (app. t, 1H, *J* 4.8 Hz, H-7a), 3.40 (app. dt, 1H, *J* 6.0, 5.0 Hz, H-3), 3.30-3.25 (m, 1H, H-5), 2.81 (app. brt, 1H, *J* 6.5 Hz, H-5), 2.30-

2.23 (m, 1H, H-6), 2.05 (brd, 1H,  $J$  12.0 Hz, H-6), 0.90 (s, 9H, *t*-Bu), 0.08 (s, 3H, CH<sub>3</sub>), 0.07 (s, 3H, CH<sub>3</sub>).

<sup>13</sup>C NMR (125 MHz, CDCl<sub>3</sub>)  $\delta$  163.8 (CO), 150.4 (C), 138.3 (C), 137.7 (C), 135.2 (C), 130.6 (CH), 128.4 (CH), 128.3 (CH), 127.6 (CH), 127.5 (CH), 126.9 (CH), 123.3 (CH), 86.9 (C-2), 81.7 (C-1), 74.3 (C-7), 73.7 (C-7a), 72.3 (CH<sub>2</sub>), 71.7 (CH<sub>2</sub>), 65.4 (C-3), 59.9 (C-8), 46.2 (C-5), 34.7 (C-6), 25.9 (C(CH<sub>3</sub>)<sub>3</sub>), 18.3 (C), -5.3 (CH<sub>3</sub>), -5.4 (CH<sub>3</sub>).

To a solution of crude **35a** (0.083 mmol) in MeOH (2 mL) was added K<sub>2</sub>CO<sub>3</sub> (0.023 g, 0.1669 mmol). After stirring at rt for 4 h, the mixture was evaporated and dissolved in CH<sub>2</sub>Cl<sub>2</sub> then washed with water. The aqueous layer was extracted with CH<sub>2</sub>Cl<sub>2</sub> and the combined CH<sub>2</sub>Cl<sub>2</sub> extracts were washed with brine, dried (Na<sub>2</sub>CO<sub>3</sub>) and evaporated. The residue was purified by FCC (80:20 EtOAc/petrol to 10:90 MeOH/EtOAc) to give **35** as a pale yellow oil (26 mg, 64%).  $R_f$  0.19 (10:90 MeOH/EtOAc).

$[\alpha]_D^{24}$  -5.3 ( $c$  1.2, CHCl<sub>3</sub>).

MS (ESI +ve)  $m/z$  484 (M + H<sup>+</sup>, 100%).

HRMS (ESI +ve) calculated for C<sub>28</sub>H<sub>42</sub>NO<sub>4</sub>Si (M+H<sup>+</sup>) 484.2883, found 484.2882.

IR  $\nu_{\max}$  (cm<sup>-1</sup>): 3418, 2930, 2850, 1673, 1250, 1089.

<sup>1</sup>H NMR (500 MHz, CDCl<sub>3</sub>)  $\delta$  7.36-7.26 (m, 10H, Ar), 4.68 (d, 1H,  $J$  11.5 Hz, CHHPh), 4.62 (d, 1H,  $J$  12.0 Hz, CHHPh), 4.57 (d, 1H,  $J$  11.5 Hz, CHHPh), 4.56 (d, 1H,  $J$  12.0 Hz, CHHPh), 4.25 (app. t, 1H,  $J$  5.0 Hz, H-1), 4.23 (app. t, 1H,  $J$  5.0 Hz, H-2), 4.12 (app. brt, 1H,  $J$  2.5 Hz, H-7), 3.97 (dd, 1H,  $J$  10.8, 5.3 Hz, H-8), 3.82 (dd, 1H,  $J$  10.8, 5.3 Hz, H-8), 3.49 (app. t, 1H,  $J$  4.3 Hz, H-7a), 3.31 (app. dt, 1H,  $J$  4.8, 4.0 Hz, H-3), 3.04-2.99 (m, 1H, H-5), 2.81 (brt, 1H,  $J$  7.8 Hz, H-5), 1.96-1.94 (m, 2H, 2xH-6), 0.88 (s, 9H, *t*-Bu), 0.05 (s, 3H, CH<sub>3</sub>), 0.04 (s, 3H, CH<sub>3</sub>).

<sup>13</sup>C NMR (125 MHz, CDCl<sub>3</sub>)  $\delta$  138.4 (C), 137.9 (C), 128.4 (CH), 128.3 (CH), 128.0 (CH), 127.8 (CH), 127.6 (CH), 127.5 (CH), 85.5 (C-2), 79.5 (C-1), 73.2 (C-7a), 73.0 (CH<sub>2</sub>), 71.9 (CH<sub>2</sub>), 71.2 (C-7), 62.5 (C-3), 59.3 (C-8), 43.9 (C-5), 36.9 (C-6), 26.0 (C(CH<sub>3</sub>)<sub>3</sub>), 18.6 (C), -5.3 (CH<sub>3</sub>), -5.8 (CH<sub>3</sub>).

**(1*R*,2*R*,3*S*,7*S*,7*aR*)-3-(Hydroxymethyl)hexahydro-1*H*-pyrrolizine-1,2,7-triol (3-*epi*-australine) (**4**).**

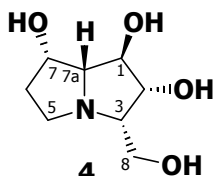

To a solution of **35** (21 mg, 0.045 mmol) in MeOH (1 mL) was added PdCl<sub>2</sub> (12 mg, 0.065 mmol). The mixture was stirred at rt under an atmosphere of H<sub>2</sub> (balloon) for 3 h, follow by the dropwise addition of conc. HCl (5 drops). Stirring at rt was continued for 21 h. The mixture was filtered through a celite pad and the solids were washed with MeOH. The combined filtrates were evaporated *in vacuo* and the residue was dissolved in water (1 mL) and applied to a column of Amberlyst (OH<sup>-</sup>) A-26 resin (3 cm). Elution with water followed by evaporation *in vacuo* gave 3-*epi*-australine **4** as a brown viscous oil (7.2 mg, 88%).

[α]<sub>D</sub><sup>23</sup> -10.5 (*c* 0.7, H<sub>2</sub>O).

MS (ESI +ve) *m/z* 190 (M + H<sup>+</sup>, 100%).

HRMS (ESI +ve) calculated for C<sub>8</sub>H<sub>16</sub>NO<sub>4</sub> (M+H<sup>+</sup>) 190.1079, found 190.1086.

IR ν<sub>max</sub> (cm<sup>-1</sup>): 3279, 2924, 2888, 1429, 1357, 1058.

<sup>1</sup>H NMR (500 MHz, D<sub>2</sub>O) δ 4.41 (brt, 1H, *J*<sub>6,7</sub> = *J*<sub>7,7a</sub> = 4.0 Hz, H-7), 4.30 (t, 1H, *J*<sub>1,2</sub> = *J*<sub>1,7a</sub> = 3.3 Hz, H-1), 4.15 (t, 1H, *J*<sub>1,2</sub> = *J*<sub>2,3</sub> = 4.0 Hz, H-2), 4.01 (dd, 1H, *J*<sub>8,8'</sub> = 11.8 Hz, *J*<sub>3,8</sub> = 5.8 Hz, H-8), 3.92 (dd, 1H, *J*<sub>8,8'</sub> = 11.8 Hz, *J*<sub>3,8'</sub> = 6.3 Hz, H-8'), 3.38 (t, 1H, *J*<sub>1,7a</sub> = *J*<sub>7,7a</sub> = 4.3 Hz, H-7a), 3.30 (dt, 1H, *J*<sub>3,8'</sub> = 5.3 Hz, *J*<sub>2,3</sub> = *J*<sub>3,8</sub> = 4.5 Hz, H-3), 3.15-3.10 (m, 1H, H-5α), 2.88 (t, 1H, *J*<sub>5,5</sub> = *J*<sub>5,6</sub> = 8.0 Hz, H-5β), 2.00-1.87 (m, 2H, 2xH-6).

<sup>13</sup>C NMR (125 MHz, D<sub>2</sub>O) δ 79.3 (C-2), 75.2 (C-7a), 74.7 (C-1), 70.4 (C-7), 63.9 (C-3), 57.8 (C-8), 45.3 (C-5), 35.6 (C-6).

**4•HCl salt:** [α]<sub>D</sub><sup>23</sup> -37 (*c* 0.7, H<sub>2</sub>O). [Lit.<sup>10</sup>; [α]<sub>D</sub><sup>20</sup> -3.5 ° (*c* 1.35, H<sub>2</sub>O).

<sup>1</sup>H NMR (500 MHz, D<sub>2</sub>O) δ 4.77-4.73 (m, 1H, H-7), 4.65 (s, 1H, H-1), 4.34 (d, 1H, *J* = 3.5 Hz, H-2), 4.29 (d, 1H, *J* = 5.5 Hz, H-7a), 4.16 (dd, 1H, *J* = 12.0, 4.5 Hz, H-8), 4.13-4.04 (m, 2H, H-8 and H-3), 3.74 (dd, 1H, *J* = 11.3, 5.3 Hz, H-5), 3.71-3.65 (m, 1H, H-5), 2.28 (dd, 1H, *J* = 14.0, 5.0 Hz, H-6), 2.21-2.13 (m, 1H, H-6).

<sup>13</sup>C NMR (125 MHz, D<sub>2</sub>O) δ 79.3 (C-7a), 77.4 (C-2), 74.2 (C-1), 69.3 (C-7), 67.1 (C-3), 56.1 (C-8), 48.4 (C-5), 35.0 (C-6).

10. Nash, R. J.; Fellows, L. E.; Dring, J. V.; Fleet, G. W. J.; Derome, A. E.; Hamor, T. A.; Scofield, A. M.; Watkin, D. J., *Tetrahedron Lett.* **1988**, 29, 2487-2490.

**Table 4** Physical and spectral Data for (-)-3-*Epi*-australine<sup>10</sup> and **4**.

|                     | 3- <i>Epi</i> -australine <sup>10</sup>                                | Synthetic <b>4</b>                                                                                                                                                                     |          |
|---------------------|------------------------------------------------------------------------|----------------------------------------------------------------------------------------------------------------------------------------------------------------------------------------|----------|
| Physical Appearance | oil                                                                    | brown viscous oil                                                                                                                                                                      |          |
| Optical Rotation    | $[\alpha]_D^{20}$ -3.5 ° ( <i>c</i> 1.35, H <sub>2</sub> O), HCl salt. | $[\alpha]_D^{23}$ -37 ( <i>c</i> 0.7, H <sub>2</sub> O), HCl salt                                                                                                                      |          |
| <sup>1</sup> H NMR  | 500 MHz, D <sub>2</sub> O                                              | 500 MHz, D <sub>2</sub> O                                                                                                                                                              |          |
|                     | 4.24 (dt, 1H, <i>J</i> = 4.5, 2.0 Hz, H-7)                             | 4.41 (brt, 1H, <i>J</i> <sub>6,7</sub> = <i>J</i> <sub>7,7a</sub> = 4.0 Hz, H-7)                                                                                                       |          |
|                     | 4.12 (t, 1H, <i>J</i> = 3.5 Hz, H-1)                                   | 4.30 (t, 1H, <i>J</i> <sub>1,2</sub> = <i>J</i> <sub>1,7a</sub> = 3.3 Hz, H-1)                                                                                                         |          |
|                     | 3.96 (dd, 1H, <i>J</i> = 4.5, 3.5 Hz, H-2)                             | 4.15 (t, 1H, <i>J</i> <sub>1,2</sub> = <i>J</i> <sub>2,3</sub> = 4.0 Hz, H-2)                                                                                                          |          |
|                     | 3.80-3.70 (2H, AB part of ABX, CH <sub>2</sub> OH)                     | 4.01 (dd, 1H, <i>J</i> <sub>8,8'</sub> = 11.8 Hz, <i>J</i> <sub>3,8</sub> = 5.8 Hz, H-8)<br>3.92 (dd, 1H, <i>J</i> <sub>8,8'</sub> = 11.8 Hz, <i>J</i> <sub>3,8'</sub> = 6.3 Hz, H-8') |          |
|                     | 3.25 (dd, 1H, <i>J</i> = 4.5, 4.0 Hz, H-7a)                            | 3.38 (t, 1H, <i>J</i> <sub>1,7a</sub> = <i>J</i> <sub>7,7a</sub> = 4.3 Hz, H-7a)                                                                                                       |          |
|                     | 3.16 (dt, 1H, <i>J</i> = 6.0, 4.5 Hz, H-3)                             | 3.30 (dt, 1H, <i>J</i> <sub>3,8'</sub> = 5.3 Hz, <i>J</i> <sub>2,3</sub> = <i>J</i> <sub>3,8</sub> = 4.5 Hz, H-3)                                                                      |          |
|                     | 2.96 (ddd, 1H, <i>J</i> = 11.5, 9.0, 6.0 Hz, H-5)                      | 3.15-3.10 (m, 1H, H-5)                                                                                                                                                                 |          |
|                     | 2.74 (m, 1H, H-5)                                                      | 2.88 (t, 1H, <i>J</i> <sub>5,5</sub> = <i>J</i> <sub>5,6</sub> = 8.0 Hz, H-5)                                                                                                          |          |
|                     | 1.82 (m, 2H, 2xH-6)                                                    | 2.00-1.87 (m, 2H, 2xH-6)                                                                                                                                                               |          |
| <sup>13</sup> C NMR | 125 MHz, D <sub>2</sub> O<br>(ref not given)                           | 125 MHz, D <sub>2</sub> O<br>(ref MeCN<br>δ 1.47)                                                                                                                                      | Δδ (ppm) |
|                     | 78.5 (C-2)                                                             | 79.3 (C-2)                                                                                                                                                                             | 0.8      |
|                     | 74.8 (C-7a)                                                            | 75.2 (C-7a)                                                                                                                                                                            | 0.4      |
|                     | 74.0 (C-1)                                                             | 74.7 (C-1)                                                                                                                                                                             | 0.7      |
|                     | 69.6 (C-7)                                                             | 70.4 (C-7)                                                                                                                                                                             | 0.8      |
|                     | 63.5 (C-3)                                                             | 63.9 (C-3)                                                                                                                                                                             | 0.4      |
|                     | 56.9 (C-8)                                                             | 57.8 (C-8)                                                                                                                                                                             | 0.9      |
|                     | 44.9 (C-5)                                                             | 45.3 (C-5)                                                                                                                                                                             | 0.4      |
|                     | 34.8 (C-6)                                                             | 35.6 (C-6)                                                                                                                                                                             | 0.8      |

10. Nash, R. J.; Fellows, L. E.; Dring, J. V.; Fleet, G. W. J.; Derome, A. E.; Hamor, T. A.; Scofield, A. M.; Watkin, D. J., *Tetrahedron Lett.* **1988**, 29, 2487-2490.



**(1*R*,2*R*,3*S*,7*R*,7*aR*)-3-(Hydroxymethyl)hexahydro-1*H*-pyrrolizine-1,2,7-triol (3,7-Diepi-australine) (36).**

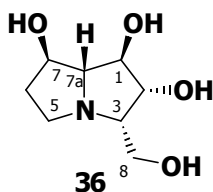

To a solution of **33** (20 mg, 0.041 mmol) in MeOH (1 mL) was added PdCl<sub>2</sub> (11 mg, 0.062 mmol). The mixture was stirred at rt under an atmosphere of H<sub>2</sub> (balloon) for 3 h, follow by the dropwise addition of conc. HCl (5 drops) at rt for 15 h. The mixture was filtered through a celite pad and the solids were washed with MeOH. The combined filtrates were evaporated *in vacuo* and the residue was dissolved in water (1 mL) and applied to a column of Amberlyst (OH<sup>-</sup>) A-26 resin (3 cm). Elution with water followed by evaporation *in vacuo* gave 3,7-diepi-australine **36** as a white solid (7.0 mg, 90%).

$[\alpha]_D^{24}$  -9.3 (*c* 1.1, H<sub>2</sub>O).

MS (ESI +ve) *m/z* 190 (*M* + H<sup>+</sup>, 100%).

HRMS (ESI +ve) calculated for C<sub>8</sub>H<sub>16</sub>NO<sub>4</sub> (*M*+H<sup>+</sup>) 190.1079, found 190.1074.

IR  $\nu_{\max}$  (cm<sup>-1</sup>): 3370, 3309, 2509, 1454, 1202, 1060.

<sup>1</sup>H NMR (500 MHz, D<sub>2</sub>O)  $\delta$  4.30 (dt, 1H,  $J_{6,7} = J_{7,7a} = 6.5$  Hz,  $J_{6,7} = 6.0$  Hz, H-7), 4.16 (brd, 1H,  $J_{2,3} = 3.5$  Hz, H-2), 4.13 (s, 1H, H-1), 3.97 (dd, 1H,  $J_{8,8'} = 11.8$  Hz,  $J_{3,8} = 7.0$  Hz, H-8), 3.92 (dd, 1H,  $J_{8,8'} = 12.0$  Hz,  $J_{3,8'} = 7.0$  Hz, H-8'), 3.28 (ddd, 1H,  $J_{2,3} = 9.0$ ,  $J_{3,8} = 7.0$ ,  $J_{2,3} = 4.0$  Hz, H-3), 3.11 (ddd, 1H,  $J_{5,5} = 10.0$ ,  $J_{5,6} = 10.0$ ,  $J_{5,6} = 6.0$  Hz, H-5 $\alpha$ ), 3.06 (dd, 1H,  $J_{7,7a} = 2.0$ ,  $J_{1,7a} = 5.5$  Hz, H-7a), 2.98 (t, 1H,  $J_{5,5} = J_{5,6} = 8.5$  Hz, H-5 $\beta$ ), 2.23-2.18 (m, 1H, H-6 $\alpha$ ), 1.80-1.72 (m, 1H, H-6 $\beta$ ).

<sup>13</sup>C NMR (125 MHz, D<sub>2</sub>O)  $\delta$  80.5 (C-1), 79.8 (C-2), 78.2 (C-7a), 75.1 (C-7), 64.9 (C-3), 57.6 (C-8), 46.4 (C-5), 34.5 (C-6).

**36**·HCl salt:  $[\alpha]_D^{21}$  -21 (*c* 0.63, H<sub>2</sub>O), HCl salt. [Lit.<sup>11</sup> for *ent*-**36**·HCl;  $[\alpha]_D^{20}$  +33° (*c* 0.1, H<sub>2</sub>O).

<sup>1</sup>H NMR (500 MHz, D<sub>2</sub>O)  $\delta$  4.63 (dt, 1H,  $J_{6,7} = 8.0$  Hz,  $J_{6,7} = J_{7,7a} = 6.0$  Hz, H-7), 4.41 (brs, 1H, H-1), 4.35 (d, 1H,  $J_{1,2} = 2.5$  Hz H-2), 4.13 (dd, 1H,  $J_{8,8'} = 12.5$  Hz,  $J_{3,8} = 5.0$  Hz, H-8), 4.10 (d, 1H,  $J_{8,8'} = 9.0$  Hz, H-8), 4.06-4.02 (m, 1H, H-3), 3.84 (d, 1H,  $J_{7,7a} = 6.5$  Hz, H-7a), 3.75 (dd, 1H,  $J_{5,5} = 11.3$  Hz,  $J_{5,6} = 6.3$  Hz, H-5), 3.73 (dd, 1H,  $J_{5,5} = 10.8$  Hz,  $J_{5,6} = 6.3$  Hz, H-5), 2.54-2.48 (m, 1H, H-6), 2.07-1.99 (m, 1H, H-6).

$^{13}\text{C}$  NMR (125 MHz,  $\text{D}_2\text{O}$ )  $\delta$  80.1 (C-7a), 77.6 (C-1), 77.1 (C-2), 73.1 (C-7), 67.7 (C-3), 55.8 (C-8), 48.6 (C-5), 33.1 (C-6).

11. Chikkanna, D.; Singh, O. V.; Kong, S. B.; Han, H., *Tetrahedron Lett.* **2005**, *46*, 8865-8868.

**Table 5** Physical and spectral Data for (+)-1,2-Diepi-alexine•HCl salt [ent-**36**]<sup>11</sup> and **36**•HCl salt [3,7-diepi-australine•HCl salt].

|                     | 1,2-Diepi-alexine•HCl salt <sup>11</sup>                        | Synthetic <b>36</b> •HCl salt                                                                                                                   |                      |
|---------------------|-----------------------------------------------------------------|-------------------------------------------------------------------------------------------------------------------------------------------------|----------------------|
| Physical Appearance | Not reported                                                    | Pale yellow viscous oil                                                                                                                         |                      |
| Optical Rotation    | $[\alpha]_D^{20} +33^\circ$ (c 0.1, H <sub>2</sub> O), HCl salt | $[\alpha]_D^{21} -21$ (c 0.63, H <sub>2</sub> O), HCl salt                                                                                      |                      |
| <sup>1</sup> H NMR  | 500 MHz, D <sub>2</sub> O                                       | 500 MHz, D <sub>2</sub> O                                                                                                                       |                      |
|                     | 4.62-4.58 (m, 1H)                                               | 4.63 (dt, 1H, $J_{6,7} = 8.0$ Hz, $J_{6,7} = J_{7,7a} = 6.0$ Hz, H-7)                                                                           |                      |
|                     | 4.37 (brs, 1H)                                                  | 4.41 (brs, 1H, H-1)                                                                                                                             |                      |
|                     | 4.32 (brs, 1H)                                                  | 4.35 (d, 1H, $J_{1,2} = 2.5$ Hz H-2)                                                                                                            |                      |
|                     | 4.12-3.98 (m, 3H)                                               | 4.13 (dd, 1H, $J_{8,8'} = 12.5$ Hz, $J_{3,8} = 5.0$ Hz, H-8)<br>4.10 (d, 1H, $J_{8,8'} = 9.0$ Hz, H-8)<br>4.06-4.02 (m, 1H, H-3)                |                      |
|                     | 3.80 (d, 1H, $J = 5.8$ Hz)                                      | 3.84 (d, 1H, $J_{7,7a} = 6.5$ Hz, H-7a)                                                                                                         |                      |
|                     | 3.75-3.60 (m, 2H)                                               | 3.75 (dd, 1H, $J_{5,5'} = 11.3$ Hz, $J_{5,6} = 6.3$ Hz, H-5 $\alpha$ )<br>3.73 (dd, 1H, $J_{5,5'} = 10.8$ Hz, $J_{5,6} = 6.3$ Hz, H-5 $\beta$ ) |                      |
|                     | 2.51-2.44 (m, 1H)                                               | 2.54-2.48 (m, 1H, H-6)                                                                                                                          |                      |
|                     | 2.04-1.96 (m, 1H)                                               | 2.07-1.99 (m, 1H, H-6)                                                                                                                          |                      |
| <sup>13</sup> C NMR | 75 MHz, D <sub>2</sub> O<br>(ref not given)                     | 125 MHz, D <sub>2</sub> O<br>(ref MeCN $\delta$ 1.47)                                                                                           | $\Delta\delta$ (ppm) |
|                     | 81.8                                                            | 80.1 (C-7a)                                                                                                                                     | 1.7                  |
|                     | 79.4                                                            | 77.6 (C-1)                                                                                                                                      | 1.8                  |
|                     | 78.9                                                            | 77.1 (C-2)                                                                                                                                      | 1.8                  |
|                     | 74.8                                                            | 73.1 (C-7)                                                                                                                                      | 1.7                  |
|                     | 69.8                                                            | 67.7 (C-3)                                                                                                                                      | 2.1                  |
|                     | 57.6                                                            | 55.8 (C-8)                                                                                                                                      | 1.8                  |
|                     | 50.3                                                            | 48.6 (C-5)                                                                                                                                      | 1.7                  |
|                     | 34.9                                                            | 33.1 (C-6)                                                                                                                                      | 1.8                  |

11. Chikkanna, D.; Singh, O. V.; Kong, S. B.; Han, H., *Tetrahedron Lett.* **2005**, *46*, 8865-8868.

$^1\text{H}$  NMR (500 MHz,  $\text{CDCl}_3$ )

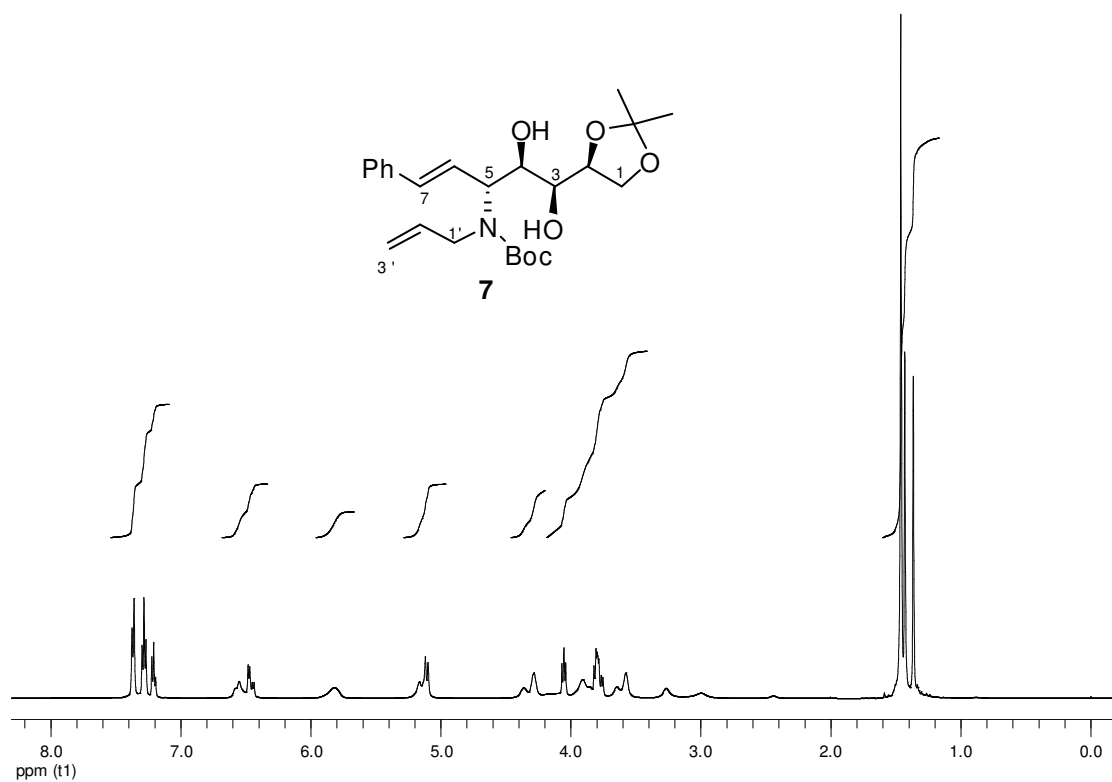

$^{13}\text{C}$  NMR (125 MHz,  $\text{CDCl}_3$ )

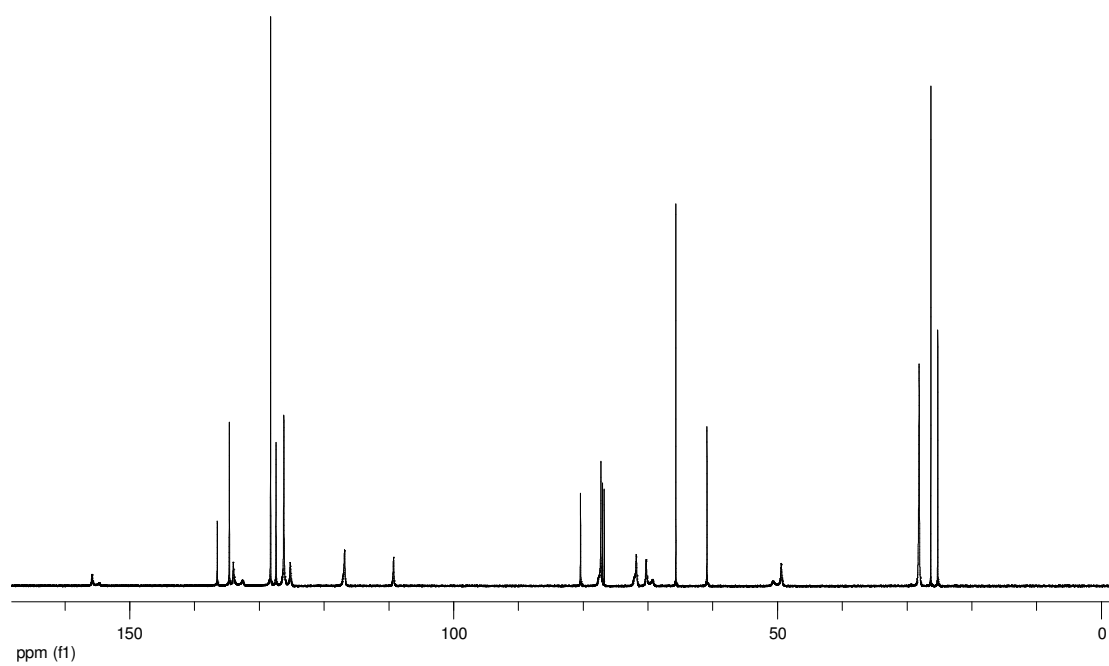

$^1\text{H}$  NMR (500 MHz,  $\text{CDCl}_3$ )

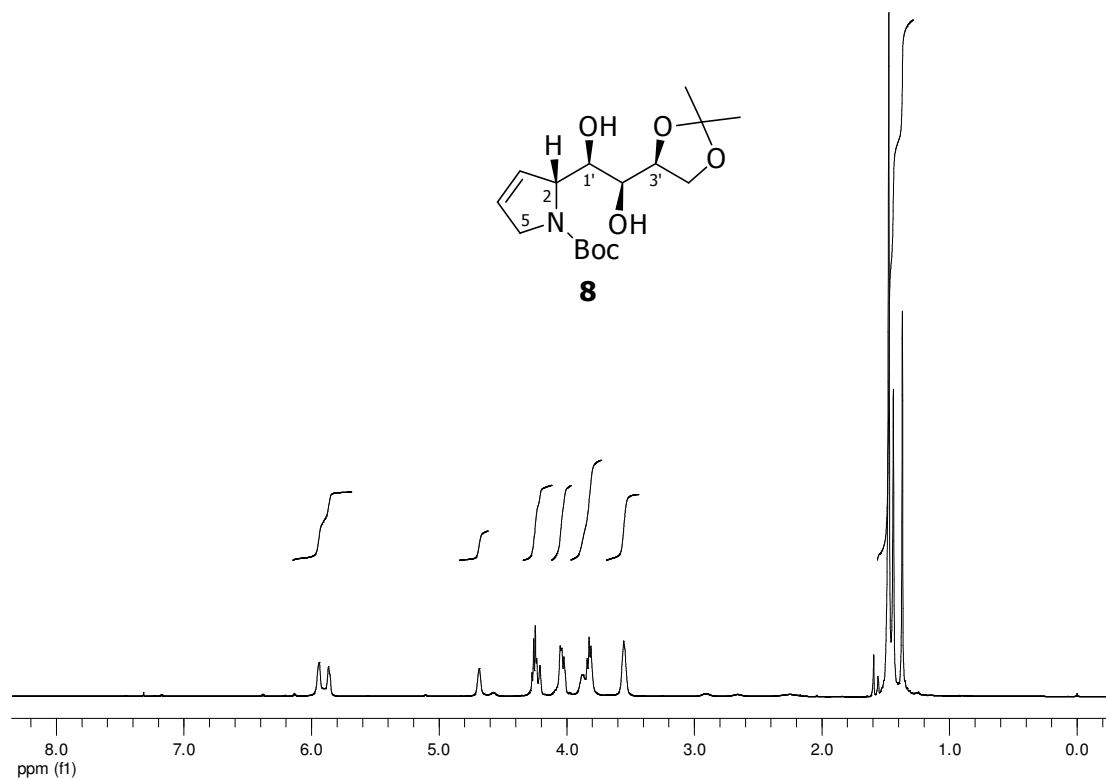

$^{13}\text{C}$  NMR (125 MHz,  $\text{CDCl}_3$ )

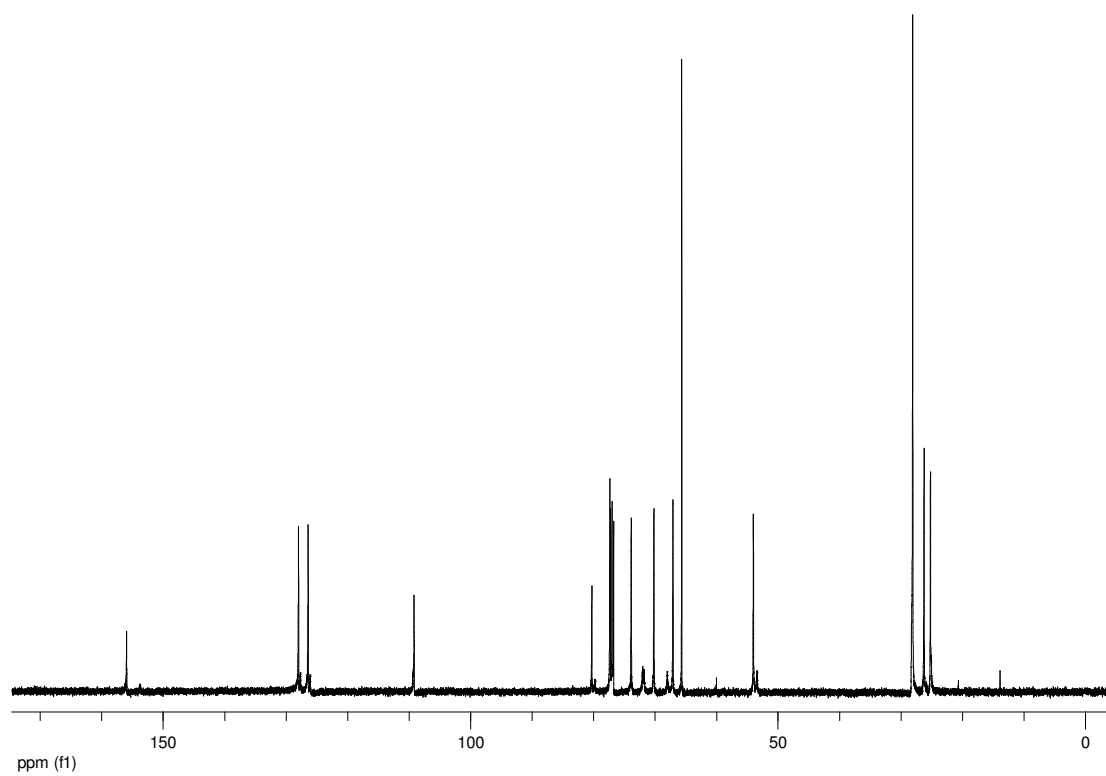

$^1\text{H}$  NMR (500 MHz,  $\text{CDCl}_3$ )

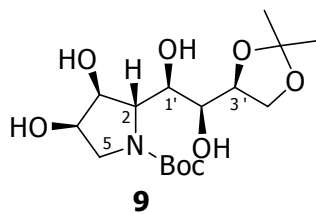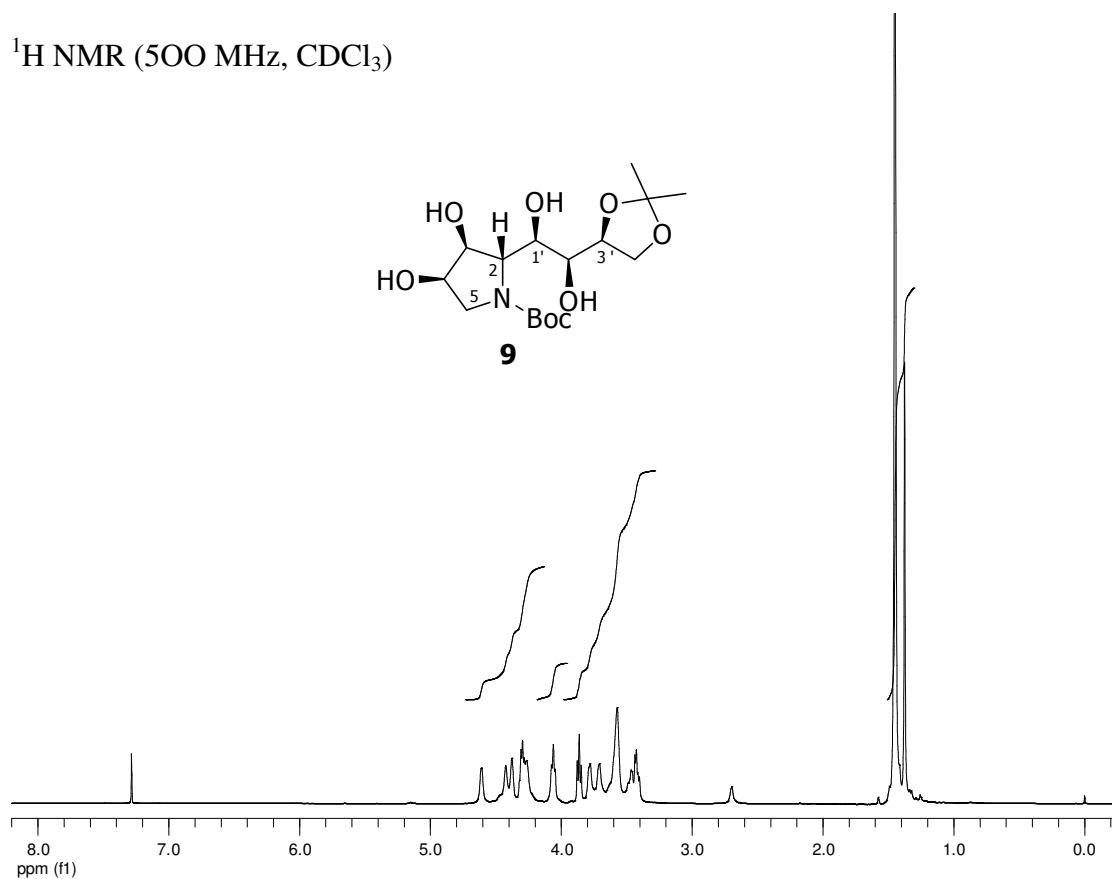

$^{13}\text{C}$  NMR (125 MHz,  $\text{CDCl}_3$ )

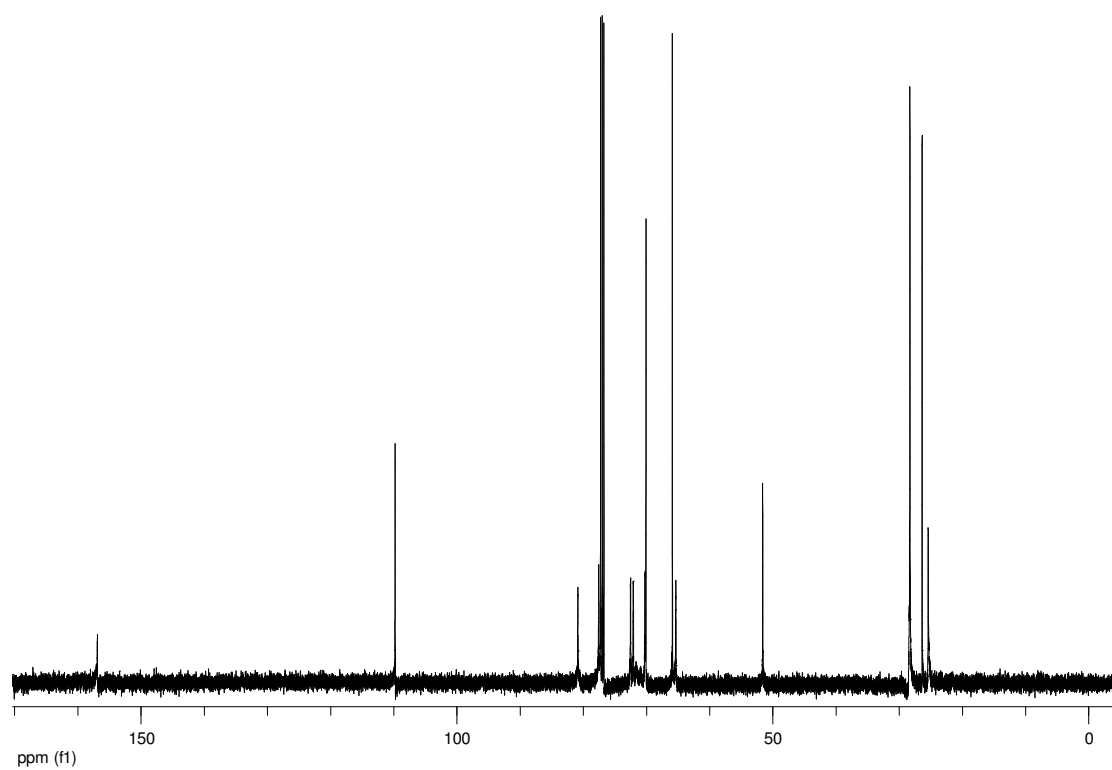

$^1\text{H}$  NMR (500 MHz,  $\text{CDCl}_3$ )

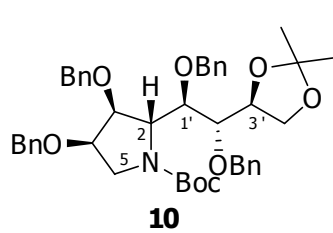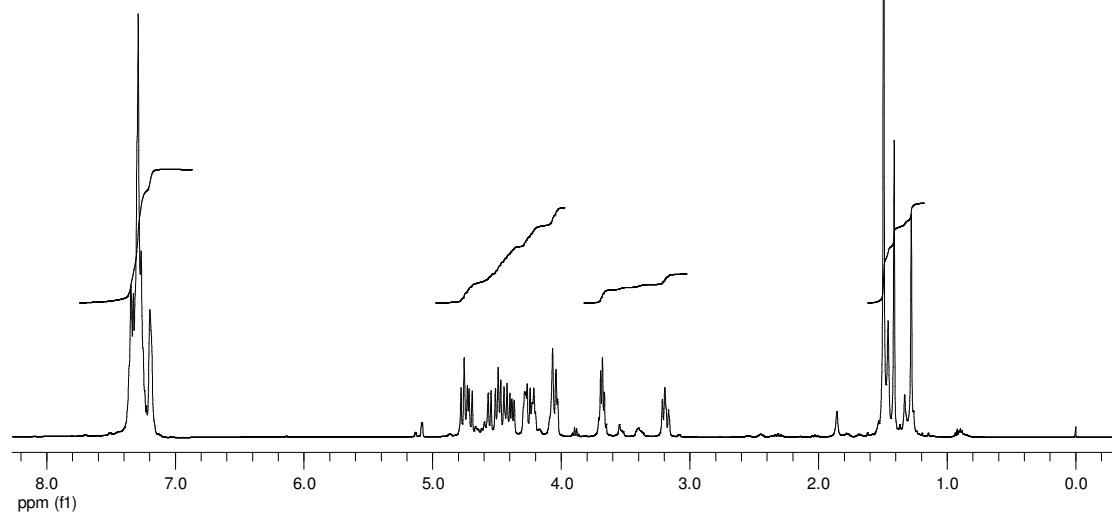

$^{13}\text{C}$  NMR (125 MHz,  $\text{CDCl}_3$ )

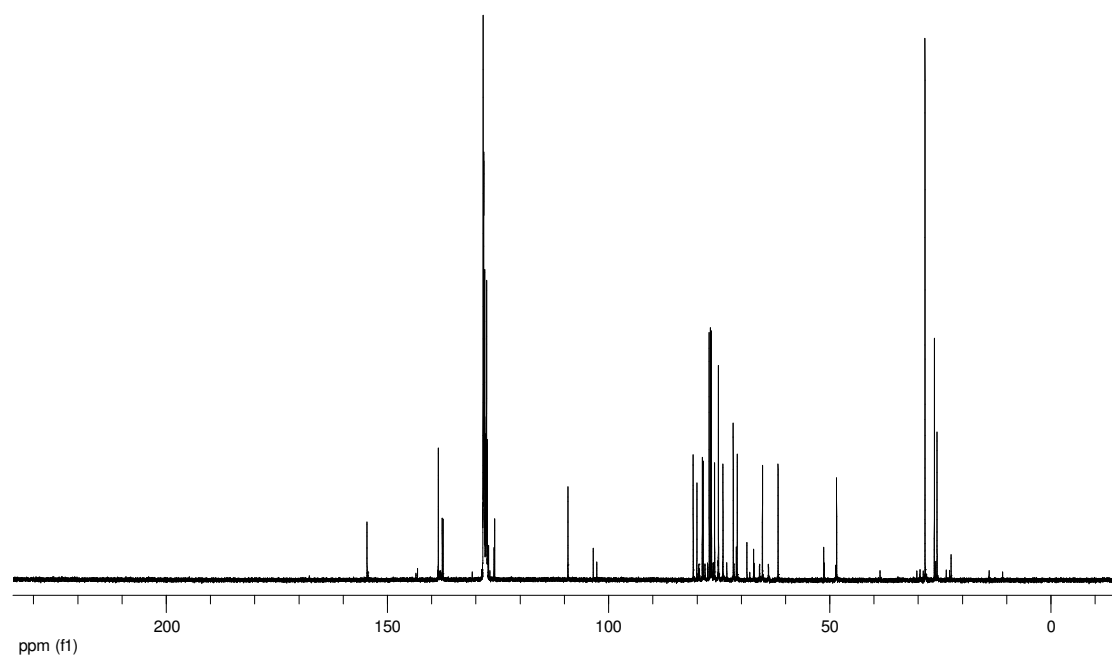

$^1\text{H}$  NMR (500 MHz,  $\text{CDCl}_3$ )

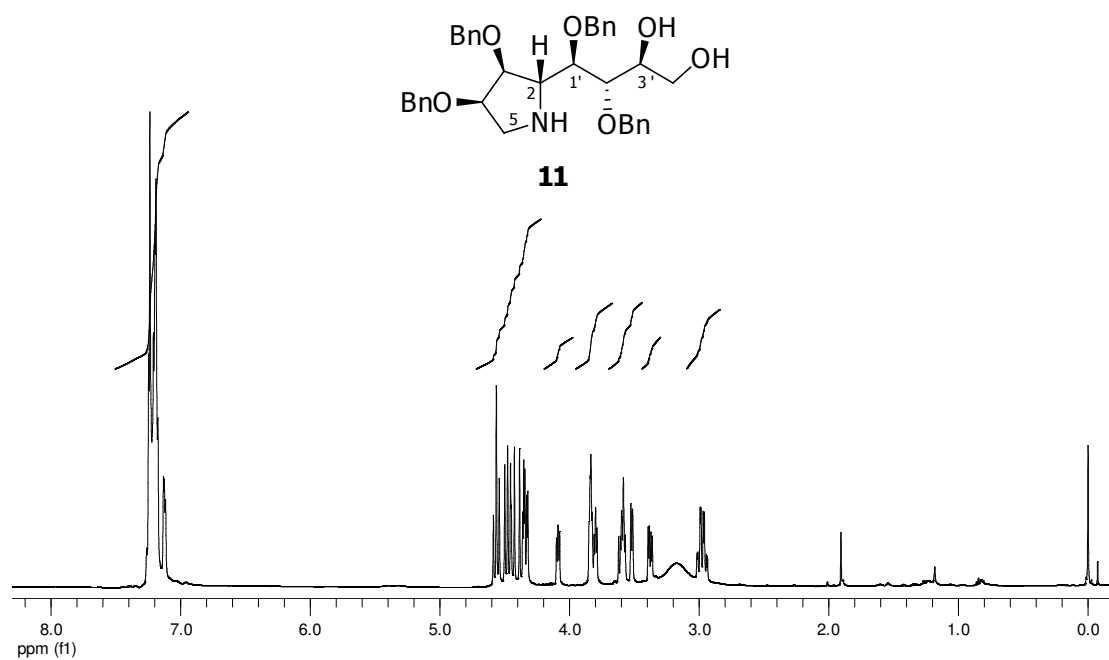

$^{13}\text{C}$  NMR (125 MHz,  $\text{CDCl}_3$ )

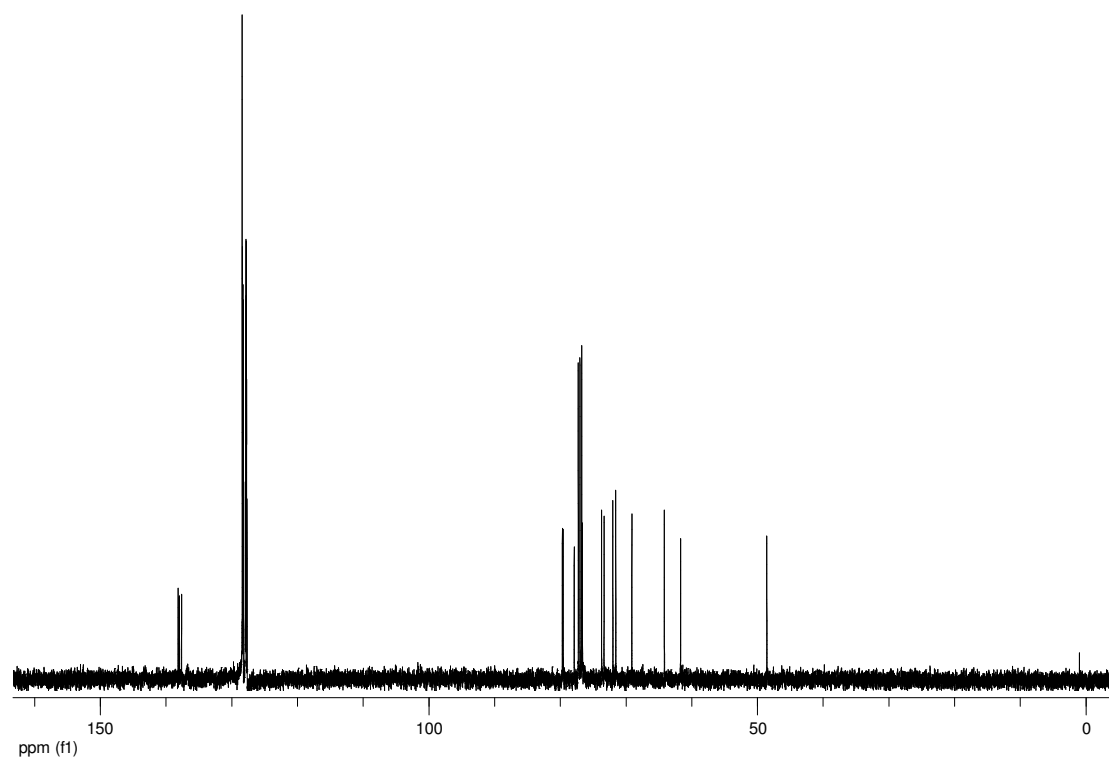



$^1\text{H}$  NMR (500 MHz,  $\text{CDCl}_3$ )

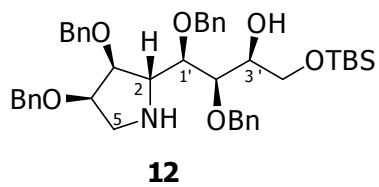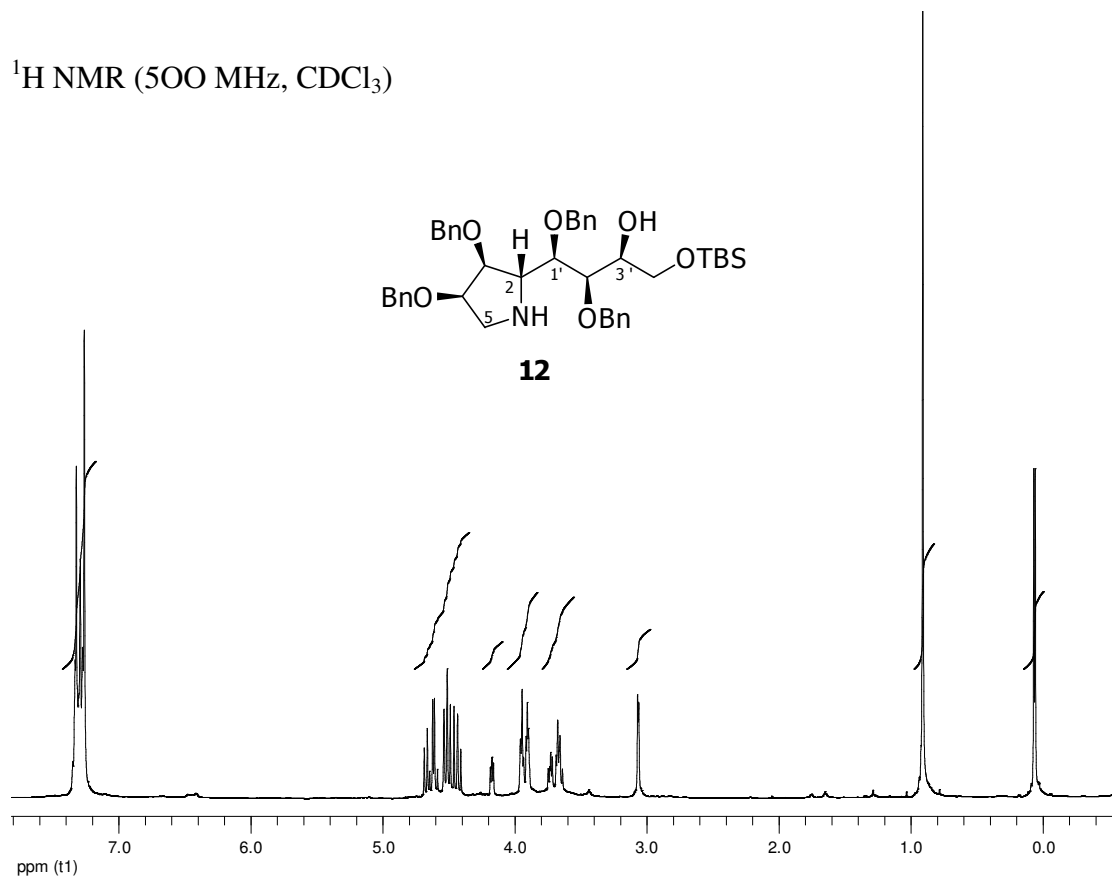

$^{13}\text{C}$  NMR (125 MHz,  $\text{CDCl}_3$ )

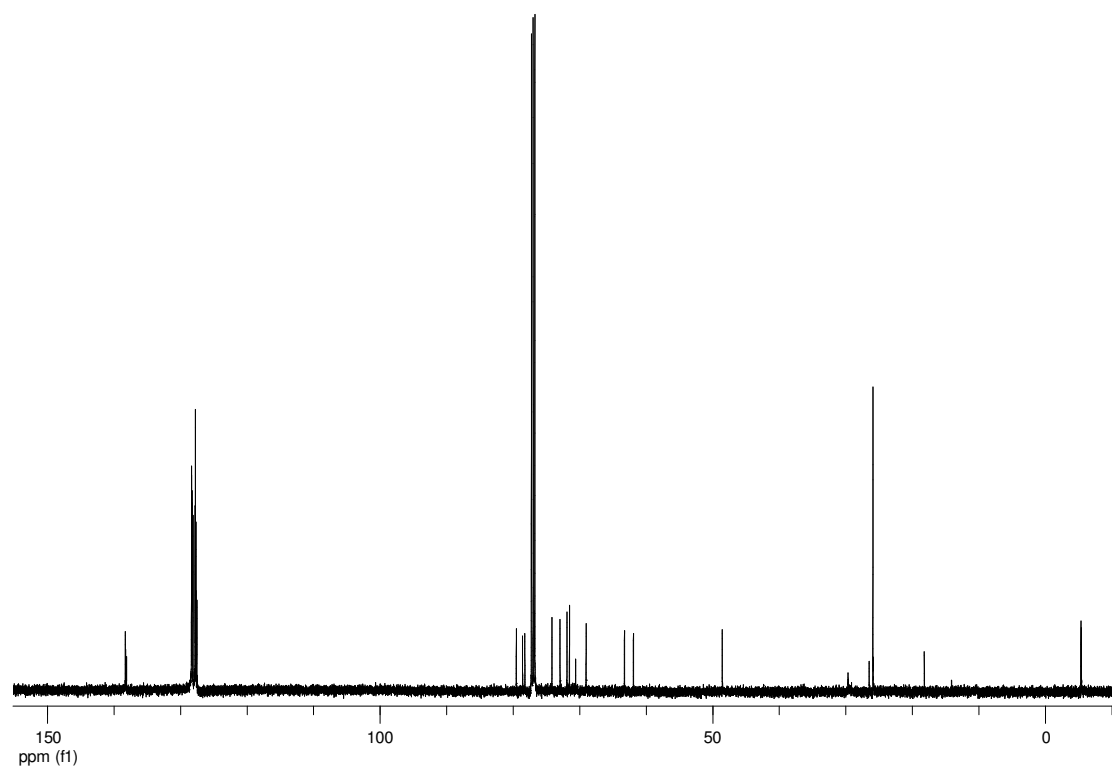

$^1\text{H}$  NMR (500 MHz,  $\text{CDCl}_3$ )

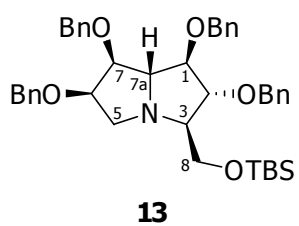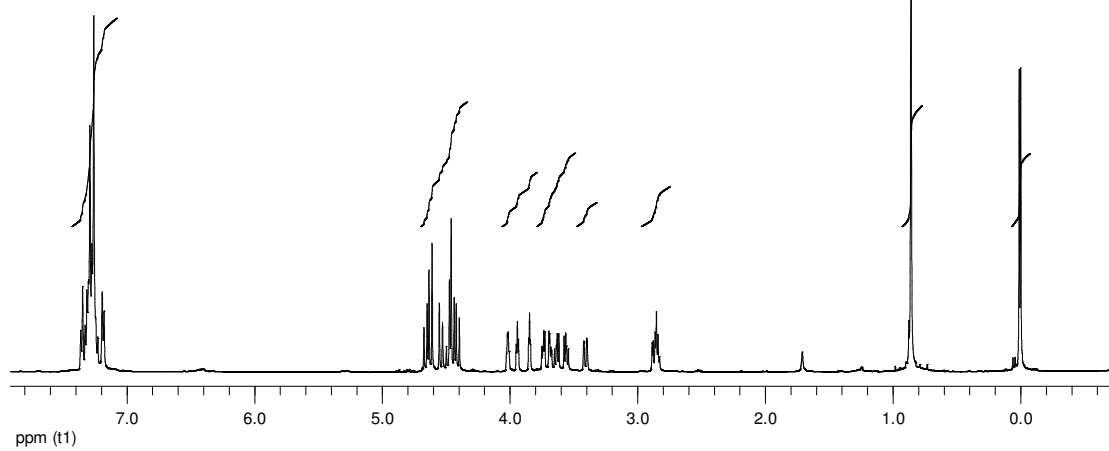

$^{13}\text{C}$  NMR (125 MHz,  $\text{CDCl}_3$ )

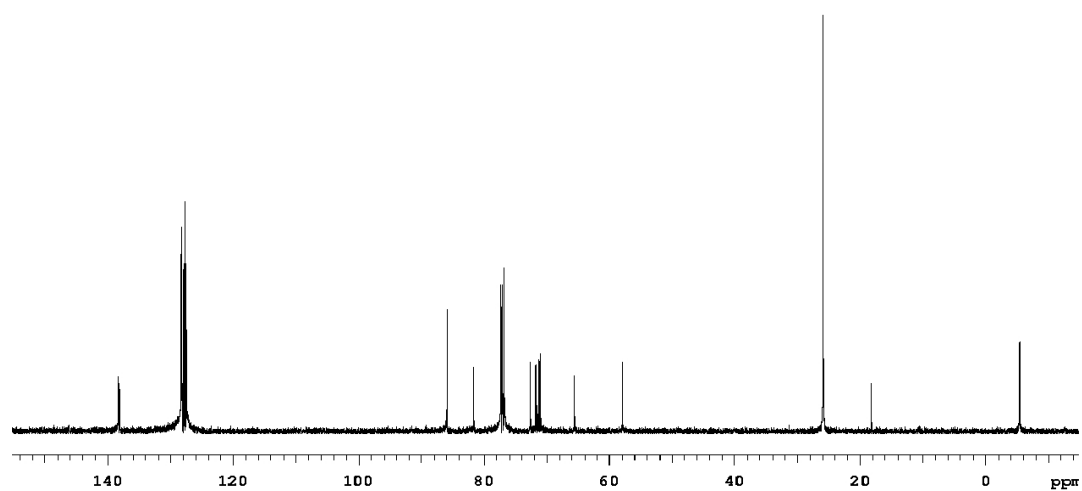

$^1\text{H}$  NMR (500 MHz,  $\text{CDCl}_3$ )

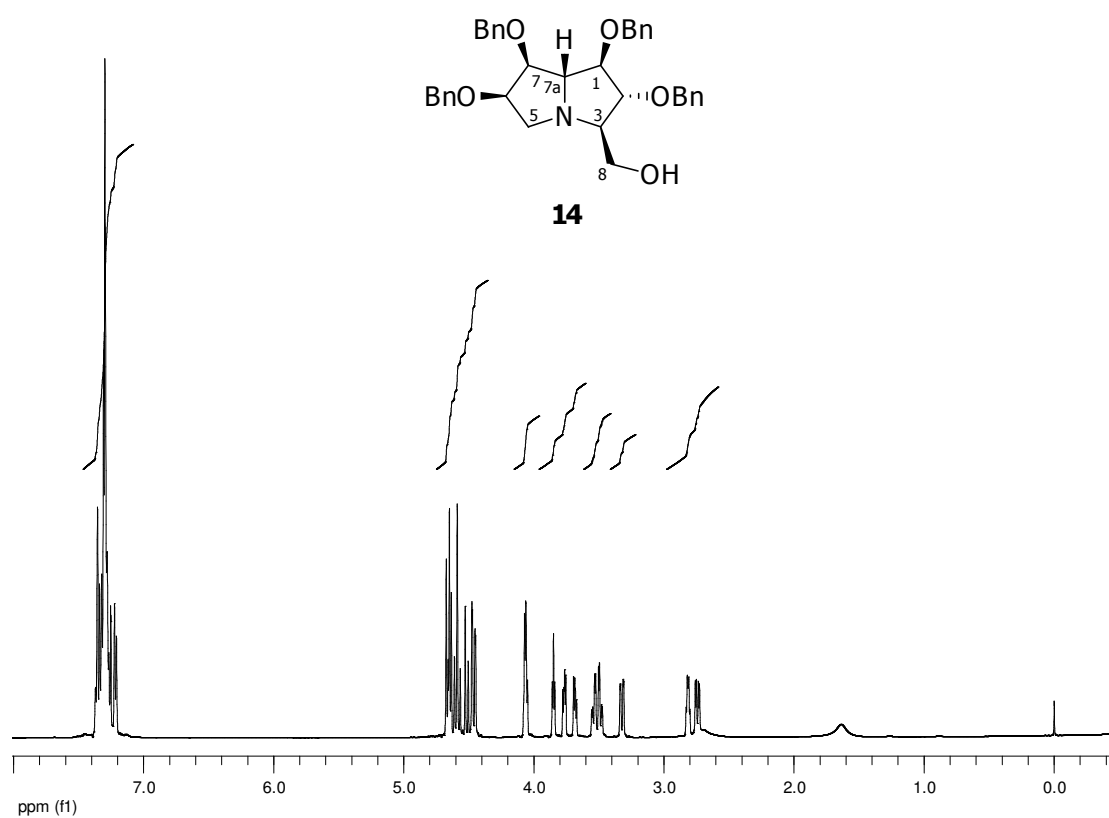

$^{13}\text{C}$  NMR (125 MHz,  $\text{CDCl}_3$ )

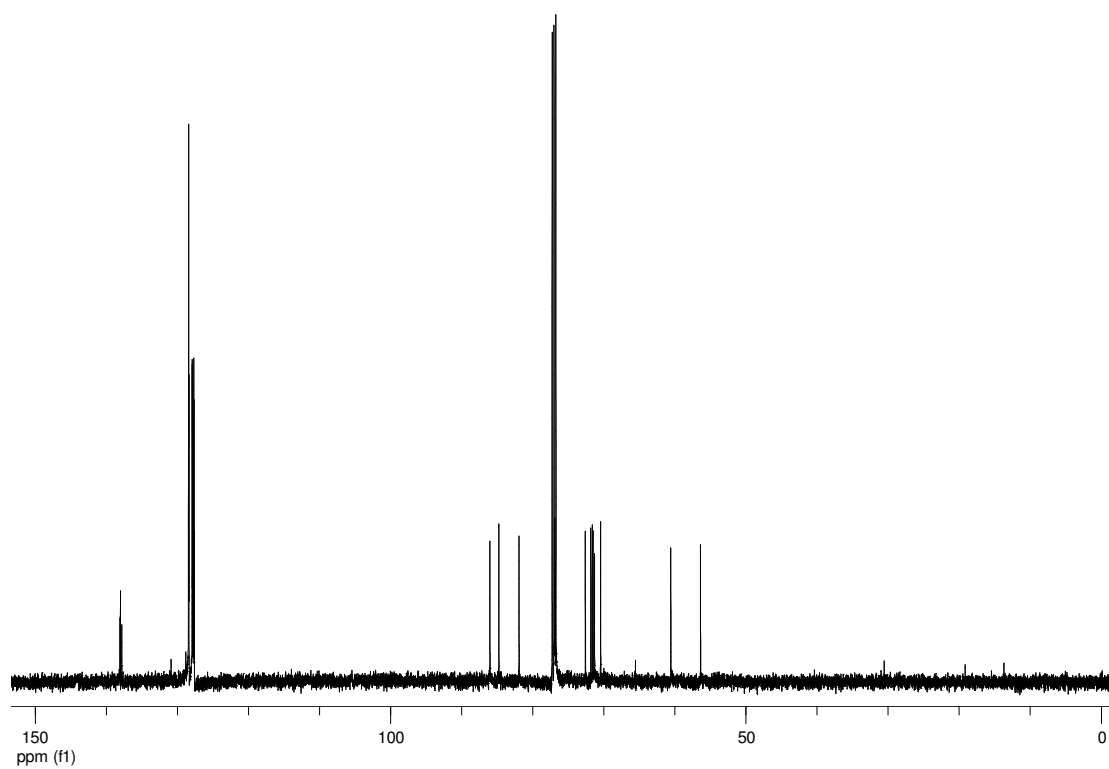

$^1\text{H}$  NMR (500 MHz,  $\text{D}_2\text{O}$ )

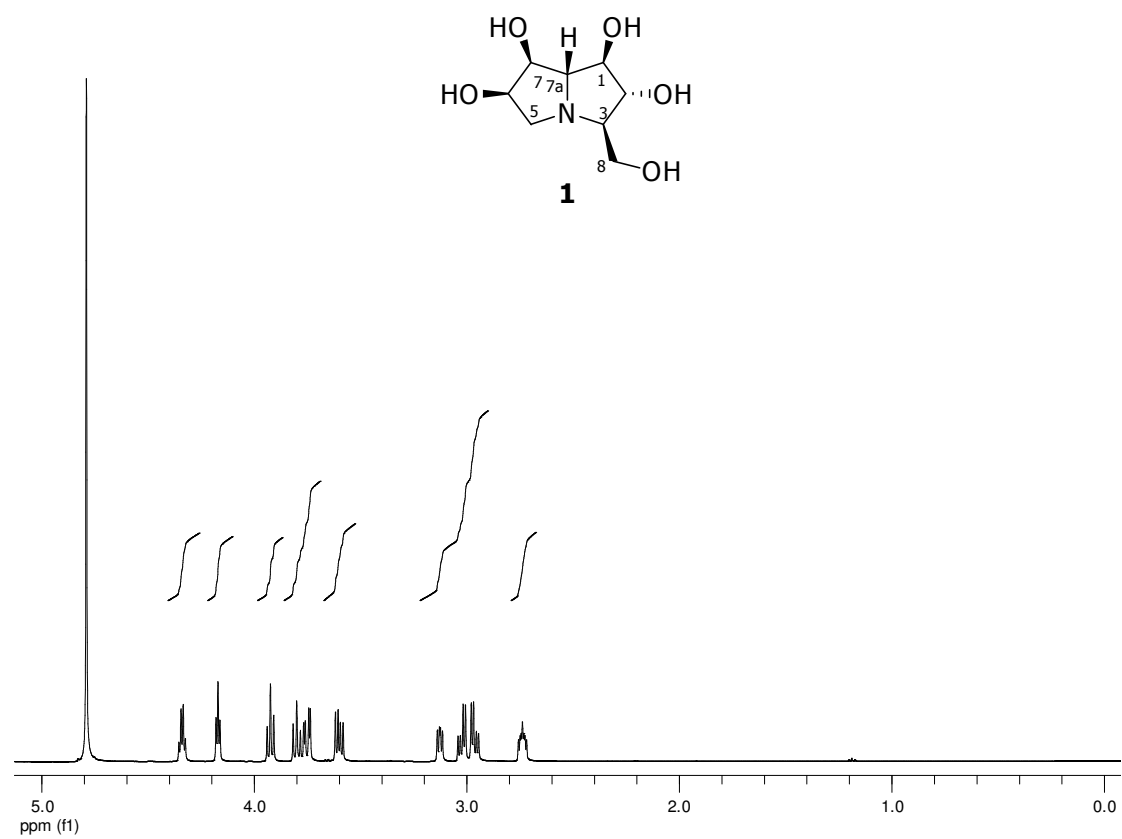

$^{13}\text{C}$  NMR (125 MHz,  $\text{D}_2\text{O}$ )

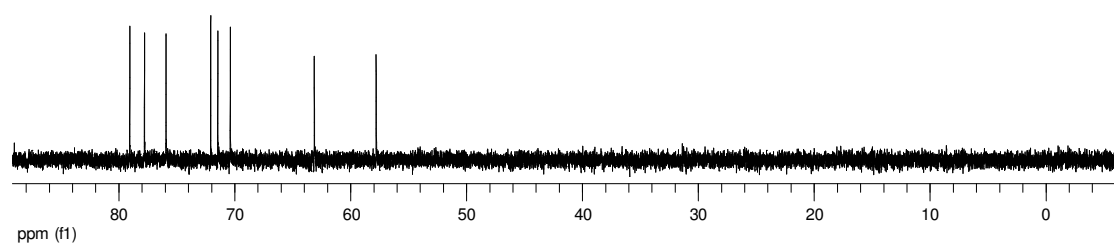



exp4 Proton

| SAMPLE              |                | SPECIAL |        |
|---------------------|----------------|---------|--------|
| date                | Aug 22 2008    | temp    | 25.0   |
| solvent             | d2o            | gain    | 52     |
| file                | /nmrdata/pyne~ | spin    | 20     |
| /fids/Archive/bup~  |                | hst     | 0.008  |
| 080903/thunwadee~   |                | pw90    | 17.887 |
| r080822 Uniflorine~ |                | alfa    | 6.600  |

```

P080822_001.fid 6.000
      _A_Proton.fid   FLAGS
ACQUISITION         il          n
sw                 2815.3       in          n
at                  2.000        dp          y
np                 11262        hs          nn

```

|    |       |            |        |
|----|-------|------------|--------|
| fb | 4000  | PROCESSING |        |
| bs | 16    | lb         | 0.50   |
| dl | 1.000 | fn         | 65536  |
| nt | 32    | DISPLAY    |        |
| ct | 32    | sp         | 1196.5 |

|             |         |     |        |
|-------------|---------|-----|--------|
| TRANSMITTER | 52      | wp  | 1104.5 |
| tn          | H1      | rfl | 2486.9 |
| sfrq        | 499.744 | rfp | 2398.8 |
| tof         | -1257.9 | rp  | -121.6 |
| tpwr        | 62      | lp  | -28.7  |

|           |        |      |     |
|-----------|--------|------|-----|
| pw        | 17.887 | PLOT | 250 |
| DECOUPLER | wc     |      | 0   |
| dn        | C13    | sc   | 633 |
| dof       | 0      | vs   | 6   |
| dm        | nnn    | th   |     |

ai cdc phi

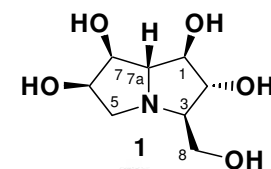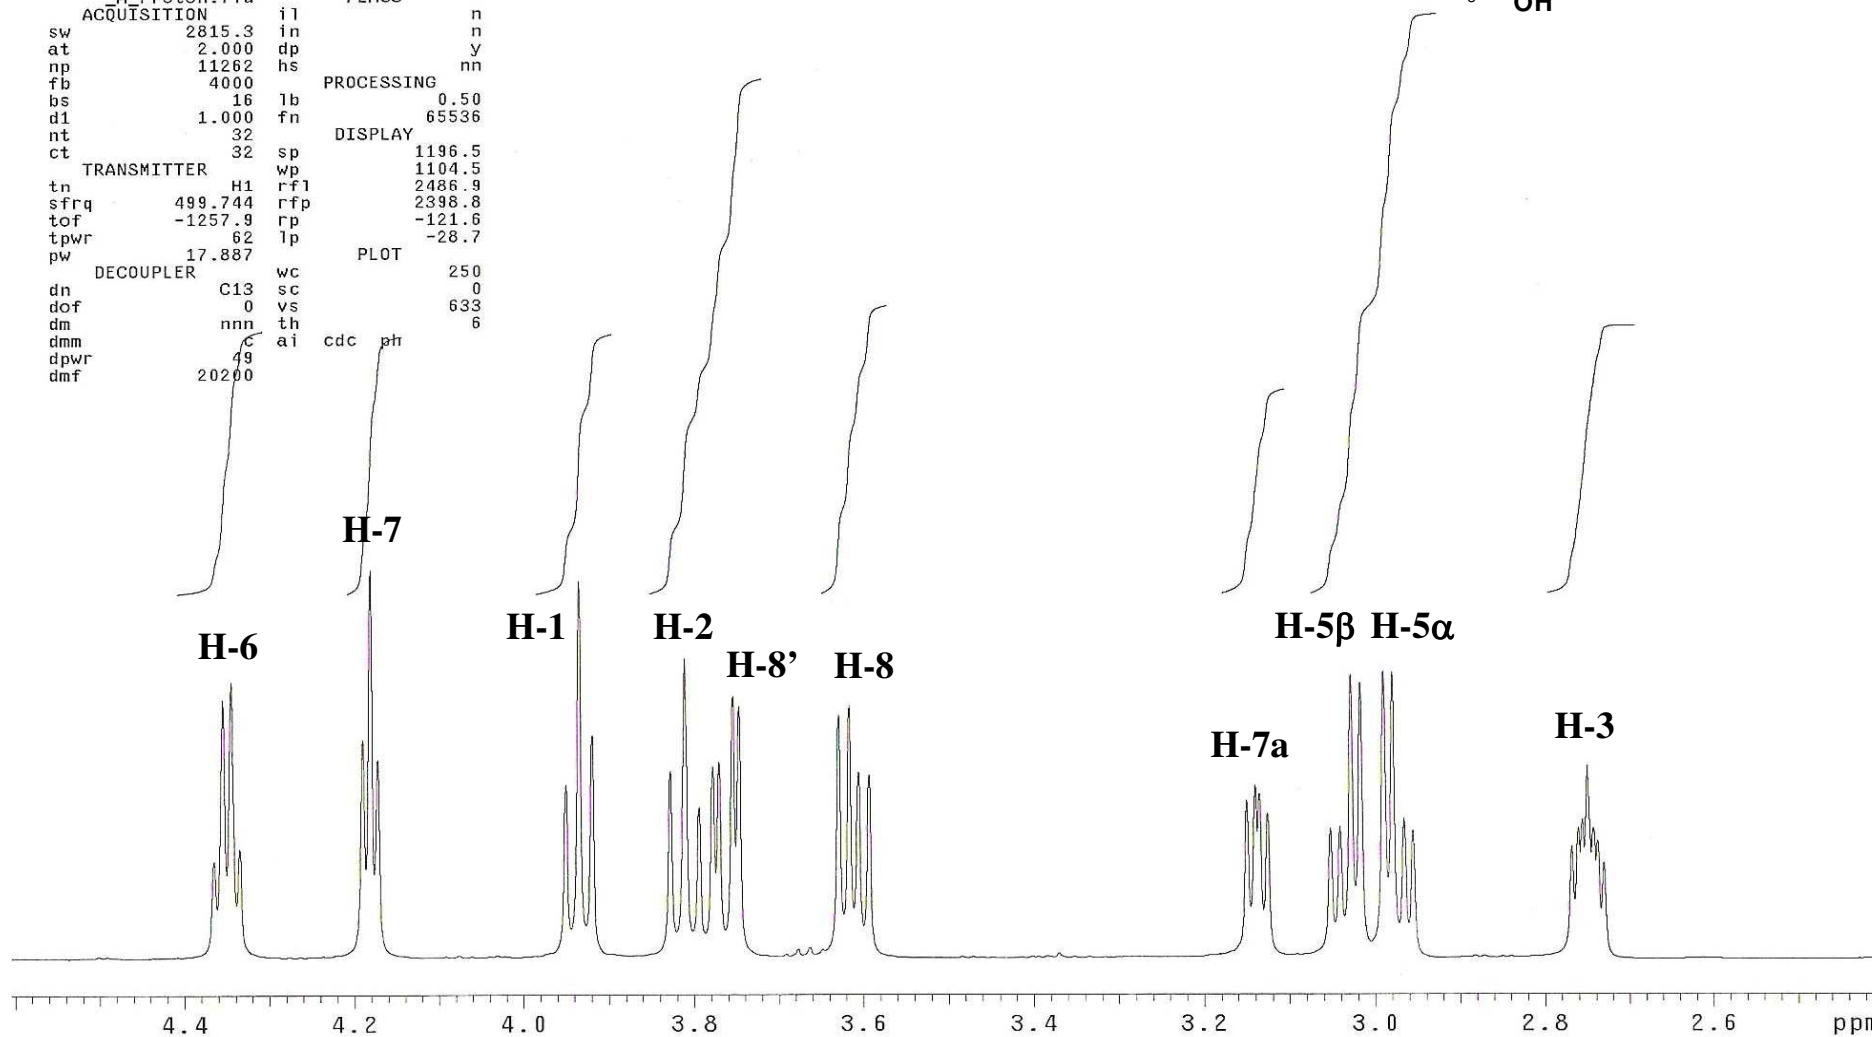<sup>1</sup>H NMR (500 MHz, D<sub>2</sub>O)

SI- 50 -

tr080821\_Uniflroine\_A\_13C

exp4 s2pu1

```
SAMPLE D2O SPECIAL
date Aug 21 2008 temp 25.0
solvent CDCl3 gain not used
file /nmrdata/pyne~ spin not used
/fids/Archive/bup~ hst 0.008
080903/thunwadee/t~ pw90 15.600
r080821_Uniflroine~ alfa 6.600
_A_13C.fid FLAGS
ACQUISITION il n
sw 31421.8 in n
at 1.300 dp y
np 81726 hs nn
fb 17000
bs 64 lb 0.50
d1 1.000 fn not used
nt 776 DISPLAY
ct 320 sp 5779.7
TRANSMITTER wp 5026.7
tn C13 rfl 9423.4
sfrq 125.716 rfp 7269.4
tof 1884.0 rp -176.6
tpwr 63 lp -187.8
pw 7.800 PLOT
DECOUPLER wc 250
dn H1 sc 0
dof 0 vs 622
dm yyy th 13
dmm w ai cdc ph
dpwr 37
dmf 12500
```

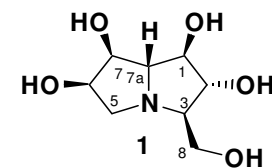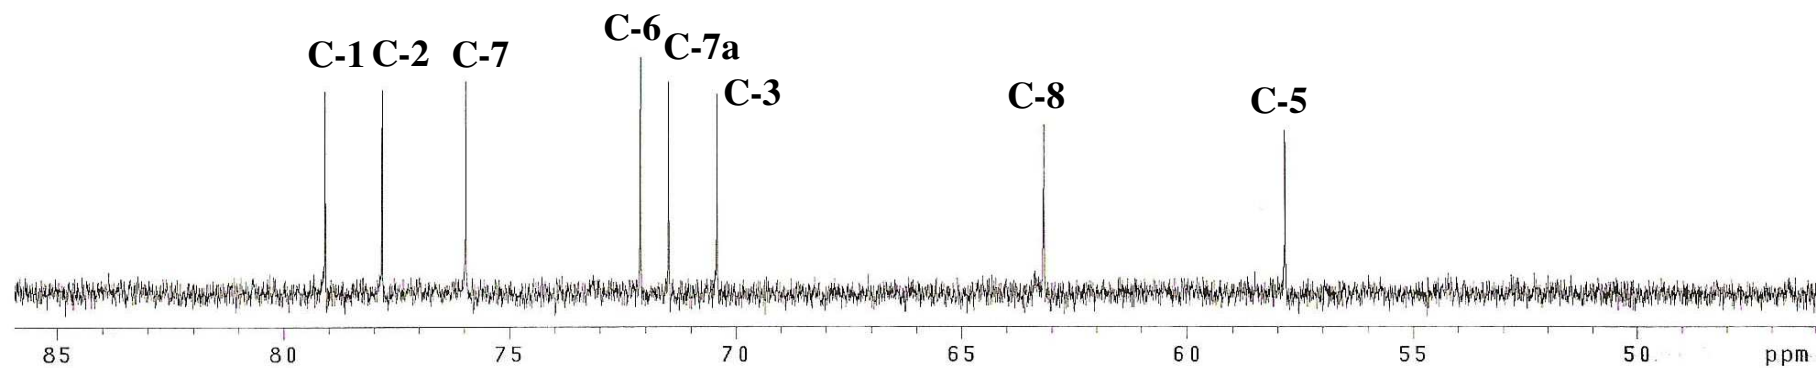

<sup>13</sup>C NMR (125 MHz, D<sub>2</sub>O)

SI- 51 -

$^1\text{H}$  NMR (500 MHz,  $\text{CDCl}_3$ )

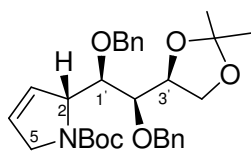

**15**

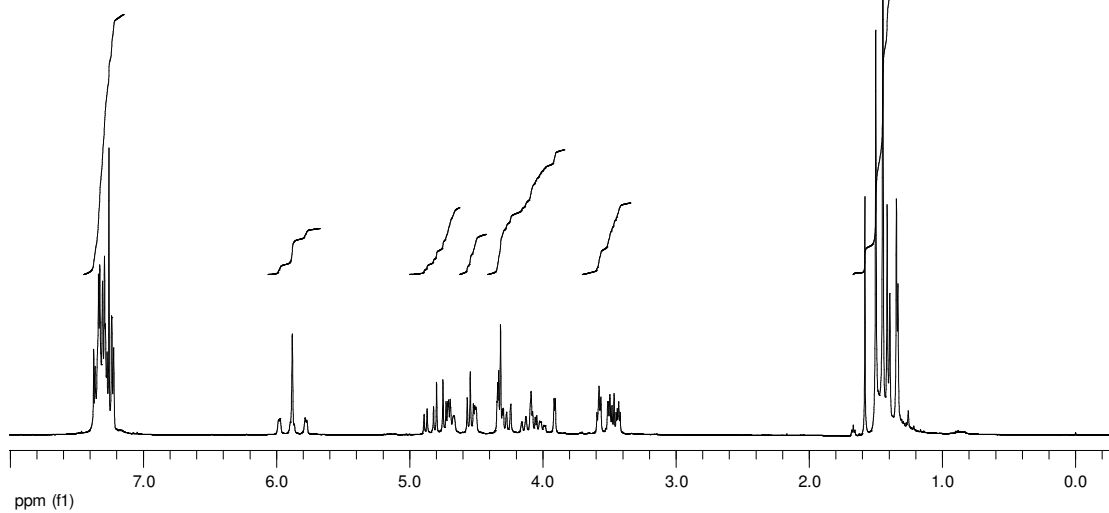

$^{13}\text{C}$  NMR (125 MHz,  $\text{CDCl}_3$ )

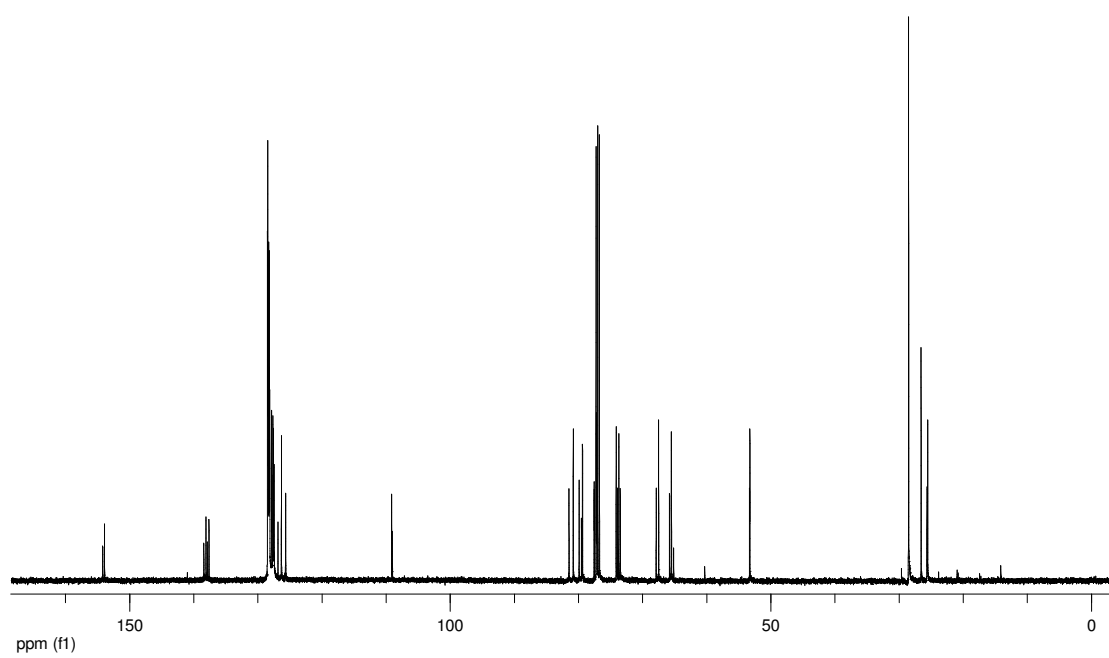



$^1\text{H}$  NMR (500 MHz,  $\text{CDCl}_3$ )

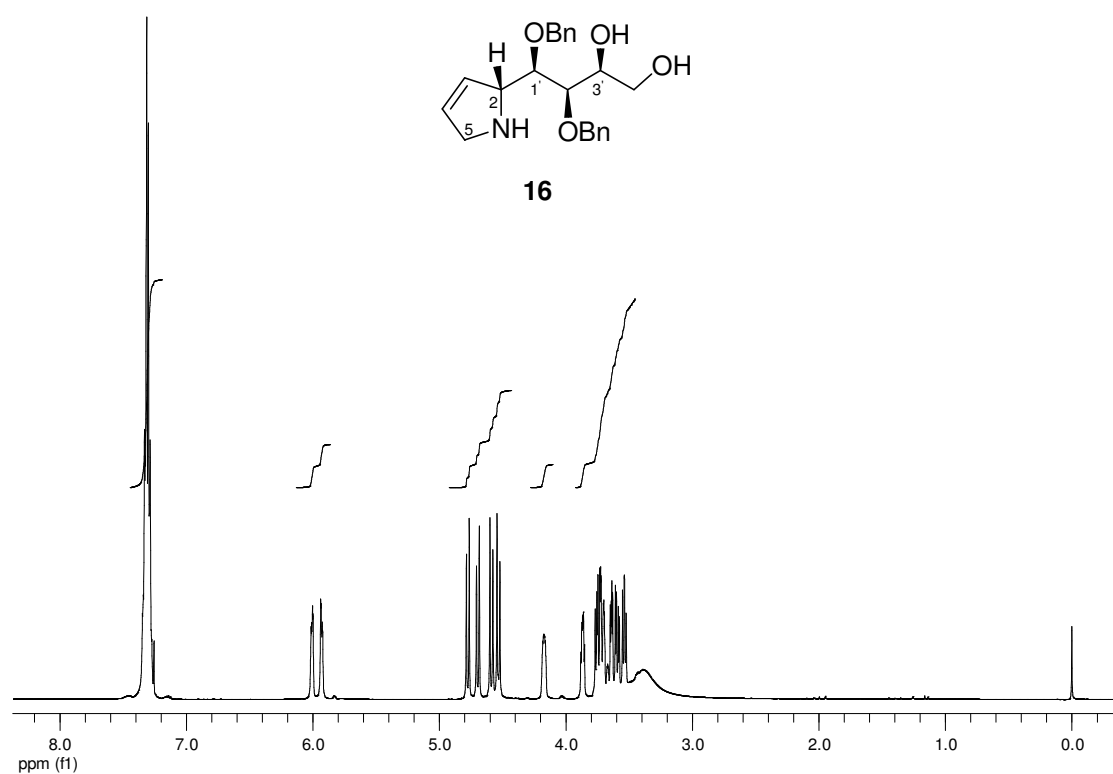

$^{13}\text{C}$  NMR (125 MHz,  $\text{CDCl}_3$ )

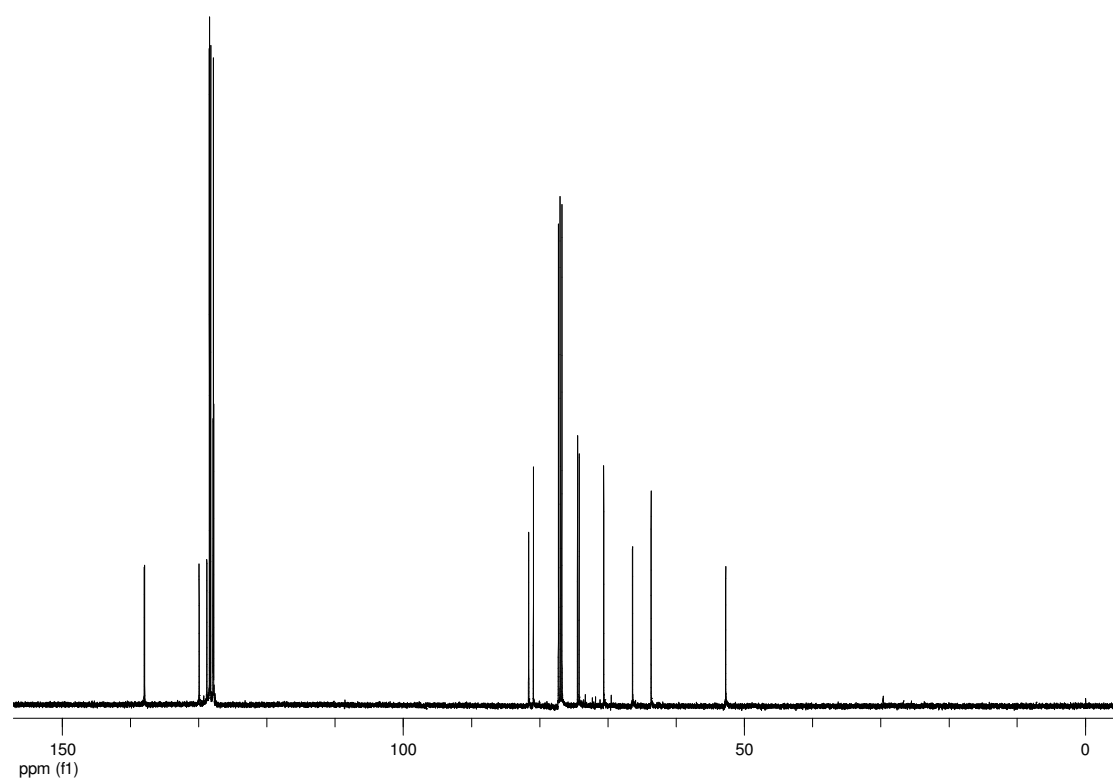

$^1\text{H}$  NMR (500 MHz,  $\text{CDCl}_3$ )

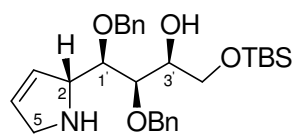

**17**

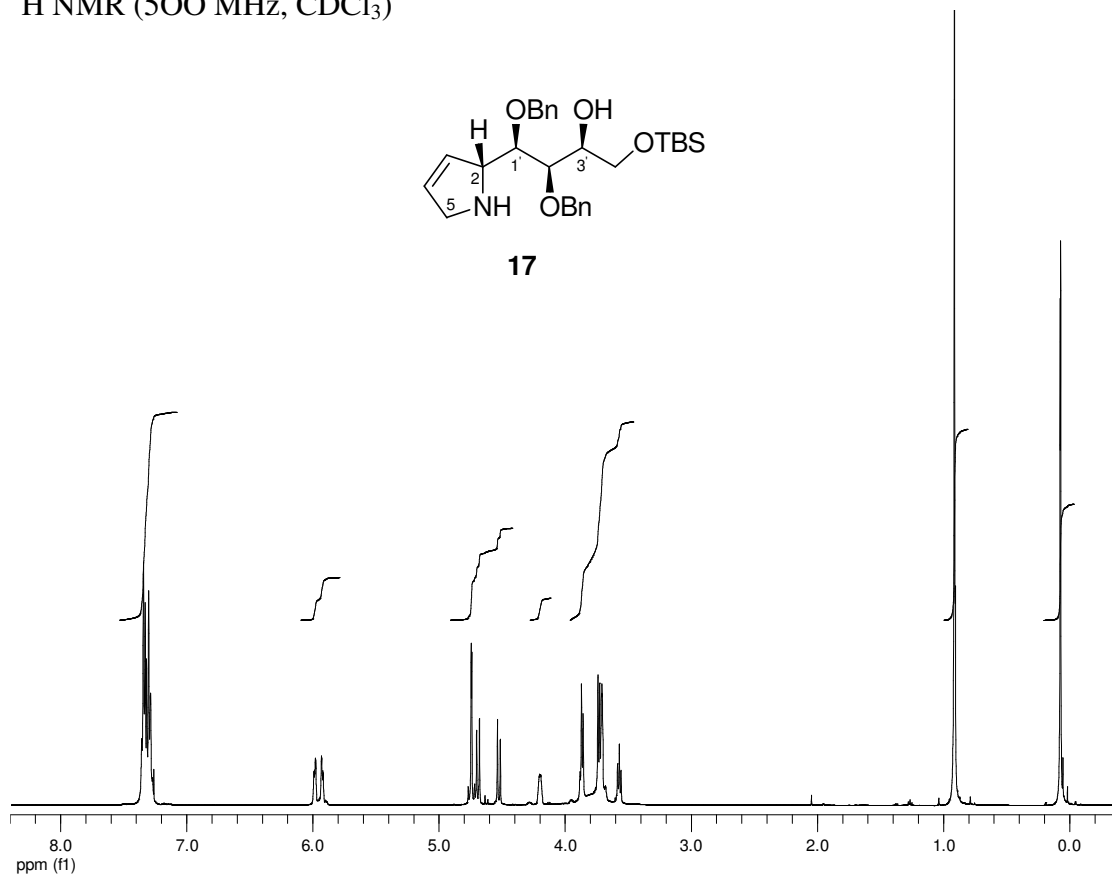

$^{13}\text{C}$  NMR (125 MHz,  $\text{CDCl}_3$ )

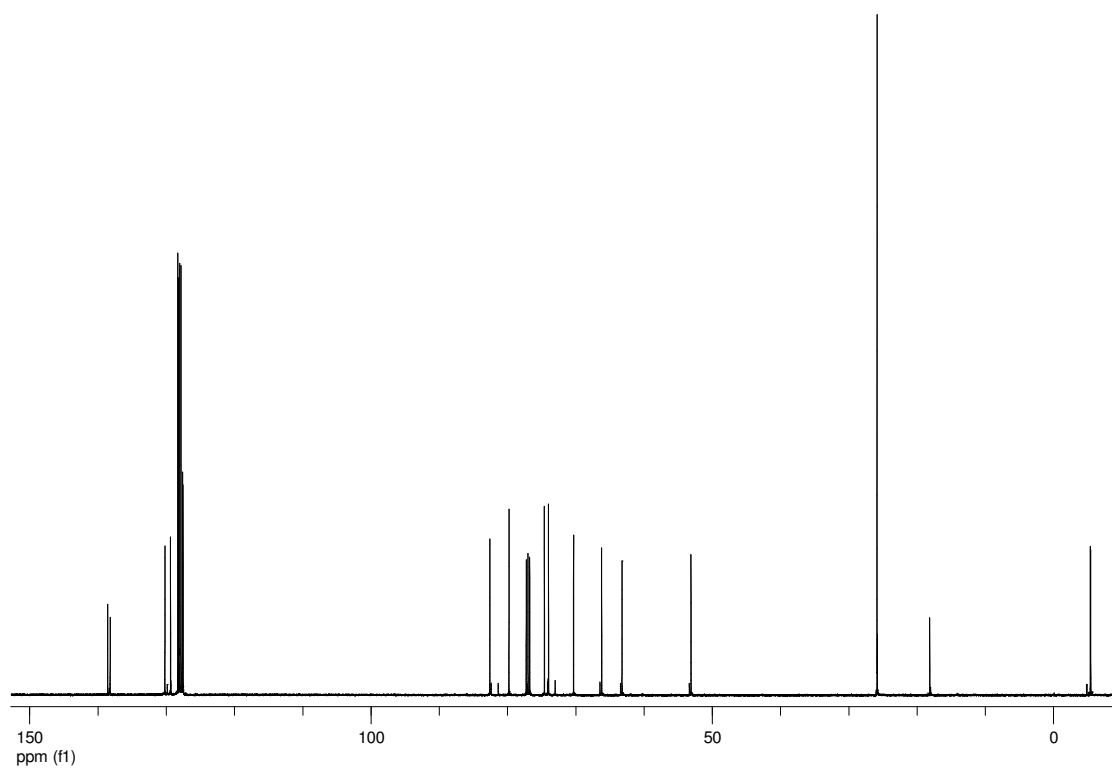

$^1\text{H}$  NMR (500 MHz,  $\text{CDCl}_3$ )

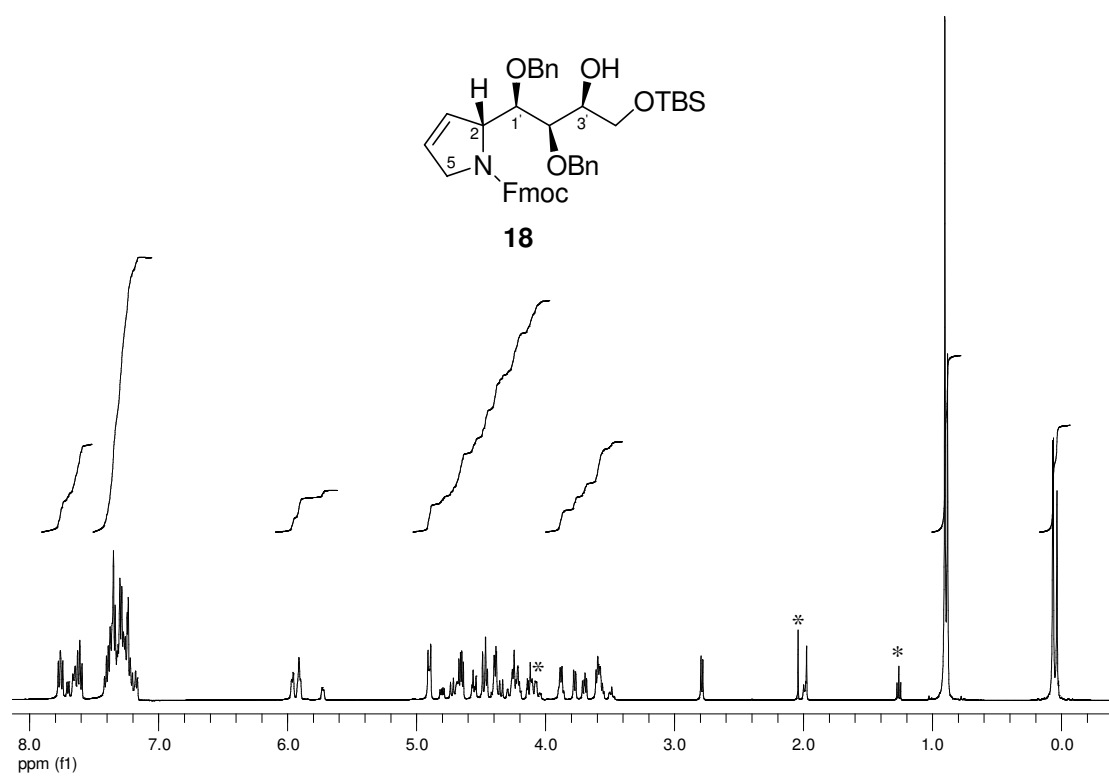

\* EtOAc

$^{13}\text{C}$  NMR (125 MHz,  $\text{CDCl}_3$ )

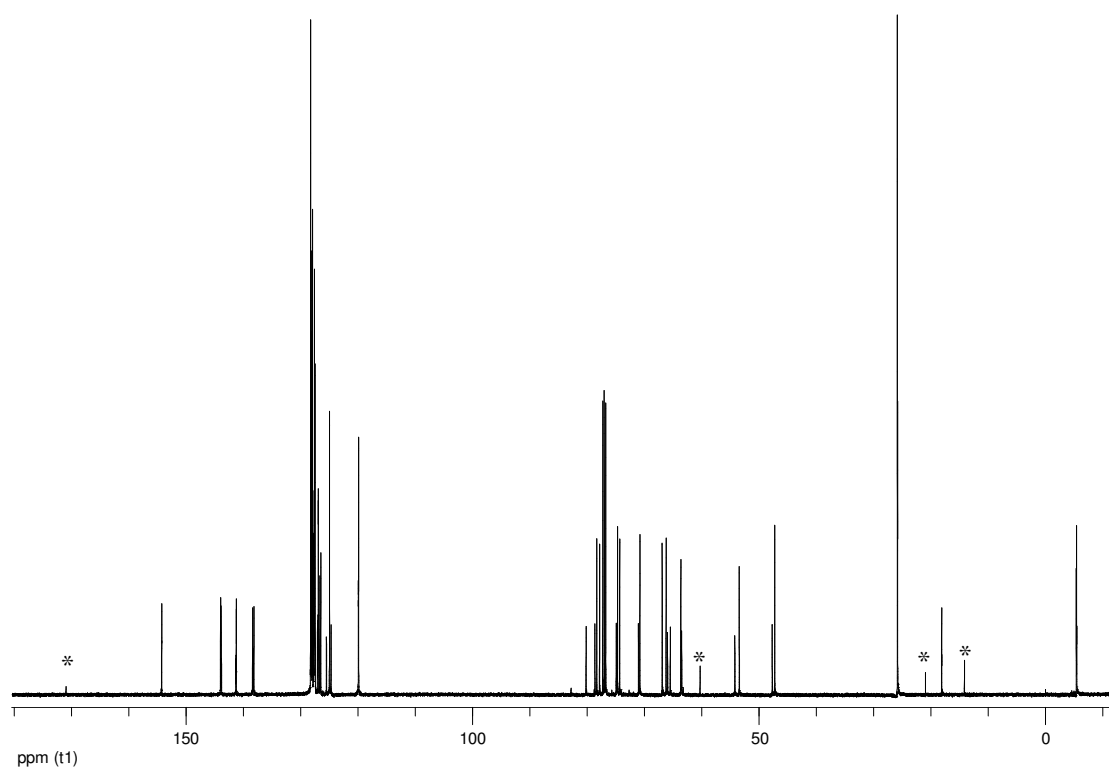

[illegible] $^{13}\text{C}$  NMR (125 MHz,  $\text{CDCl}_3$ )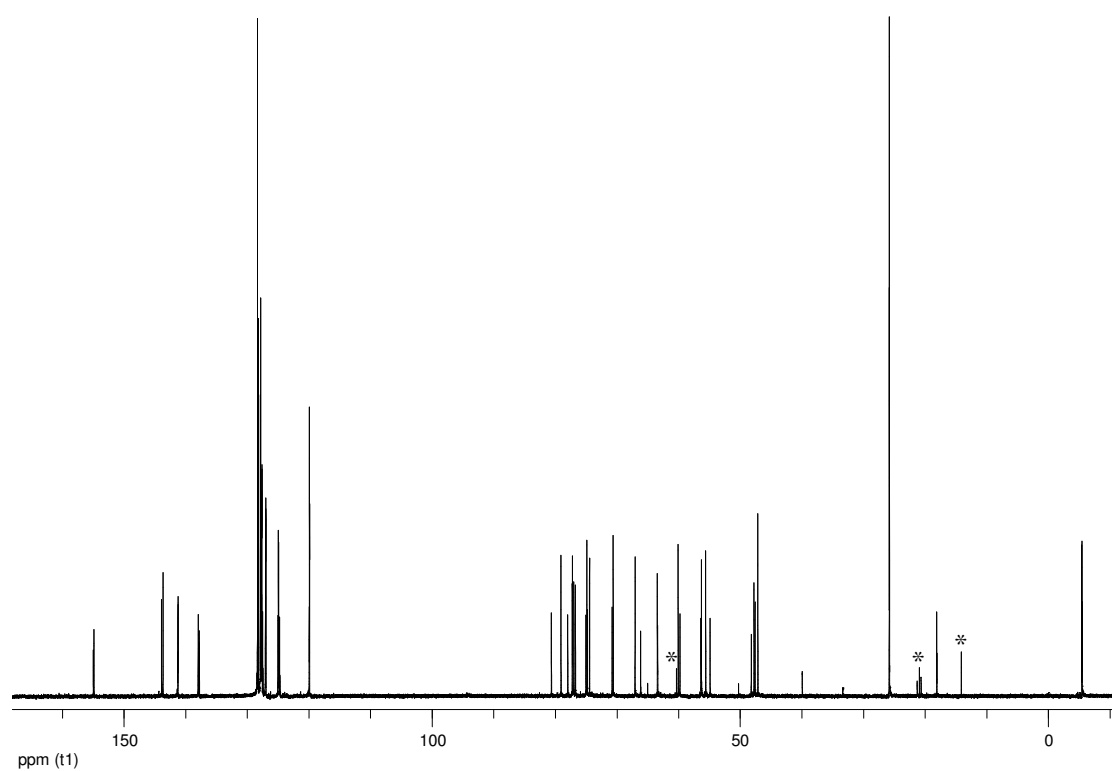

$^1\text{H}$  NMR (500 MHz,  $\text{CDCl}_3$ )

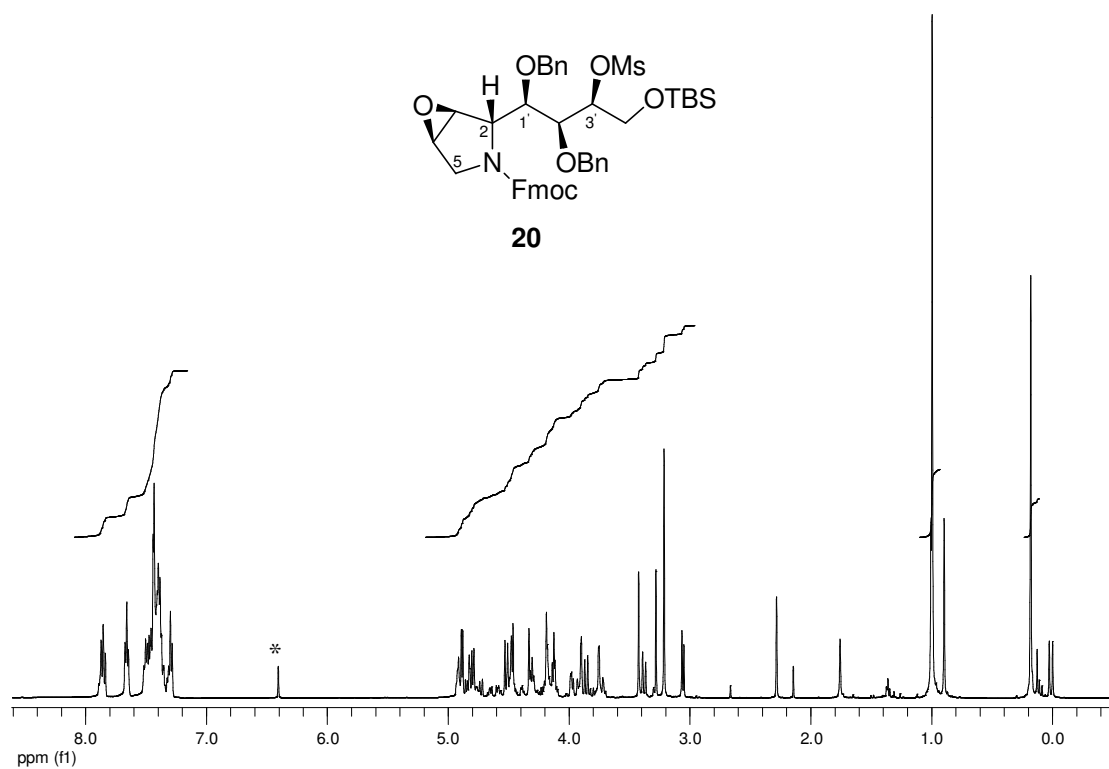

\* Impurity

$^{13}\text{C}$  NMR (125 MHz,  $\text{CDCl}_3$ )

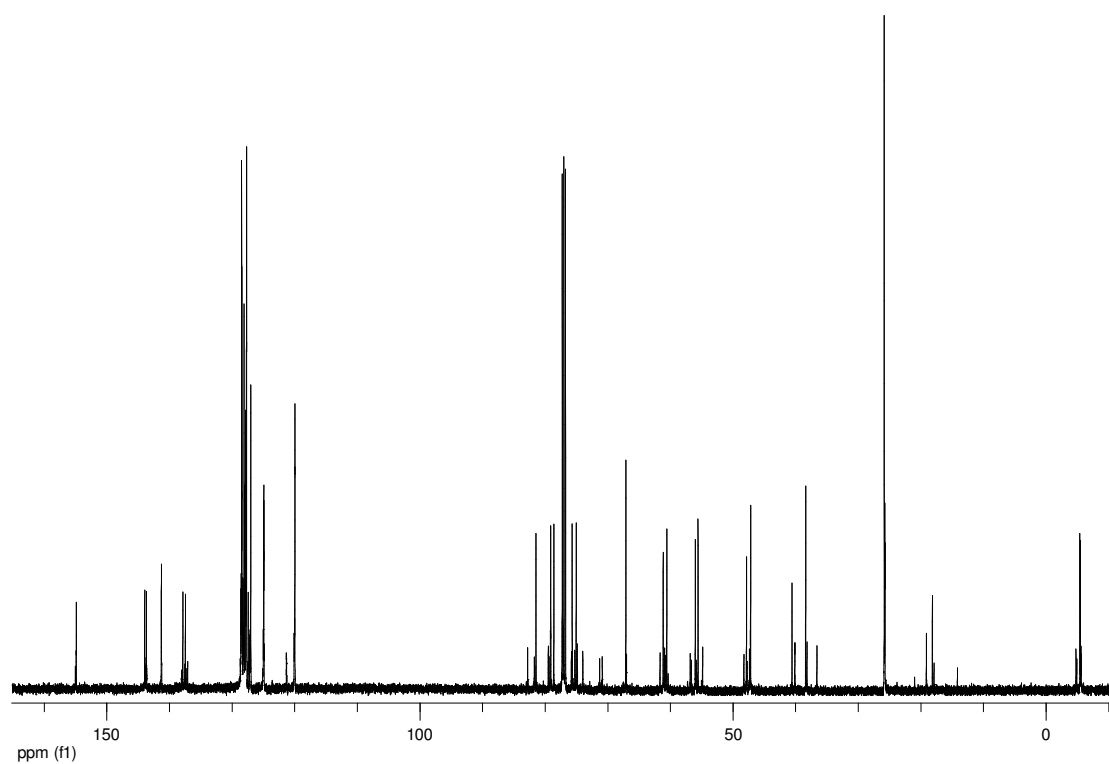

$^1\text{H}$  NMR (500 MHz,  $\text{CDCl}_3$ )

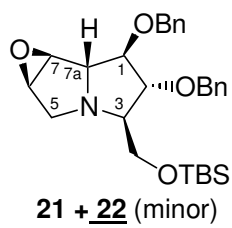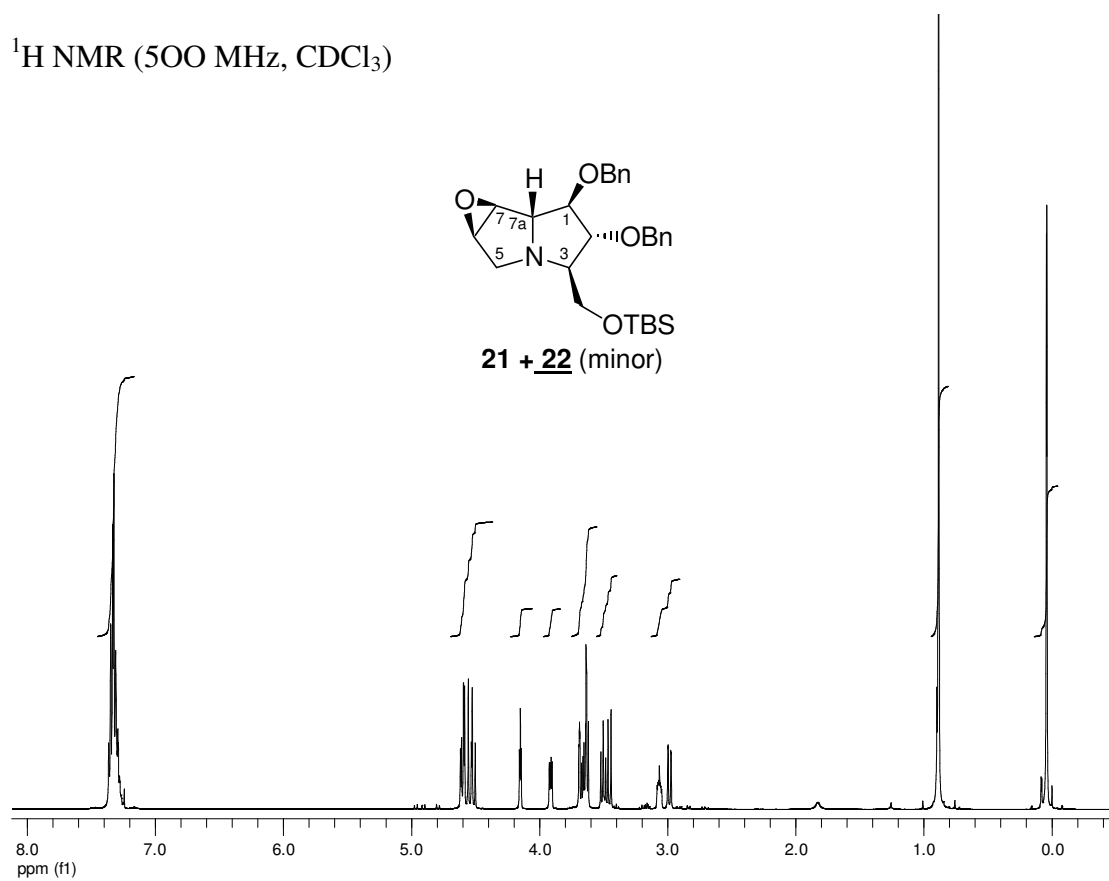

$^{13}\text{C}$  NMR (125 MHz,  $\text{CDCl}_3$ )

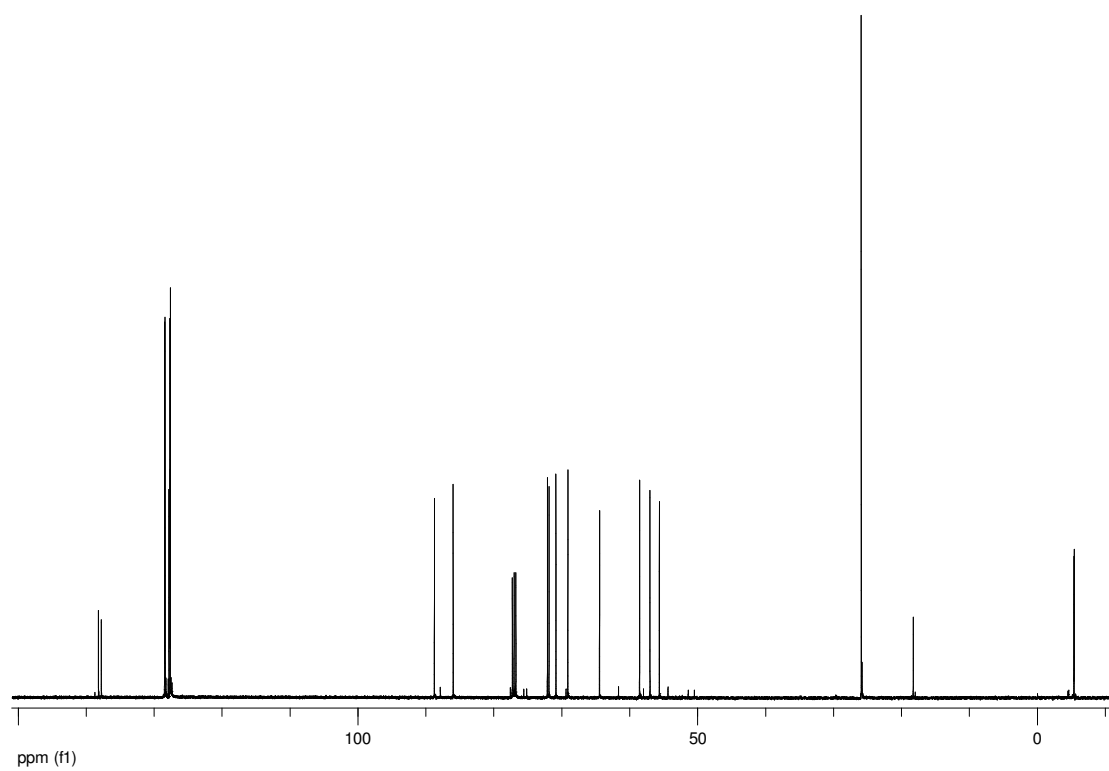

$^1\text{H}$  NMR (500 MHz,  $\text{CD}_3\text{OD}$ )

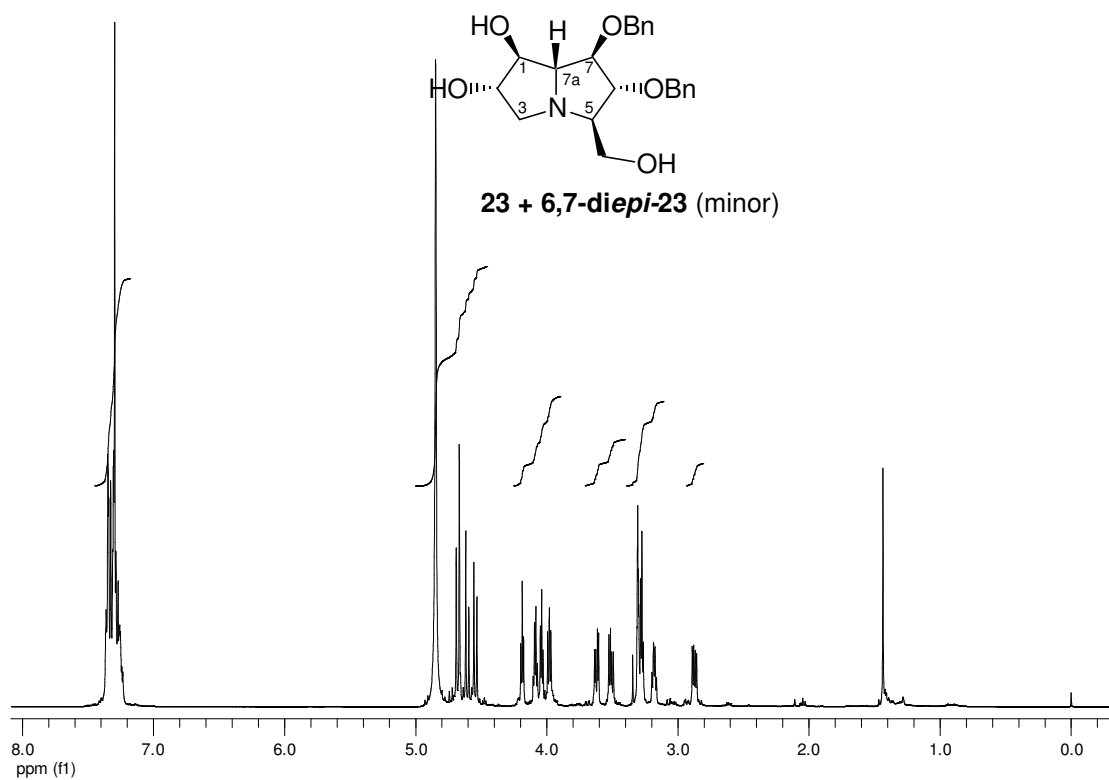

$^{13}\text{C}$  NMR (125 MHz,  $\text{CD}_3\text{OD}$ )

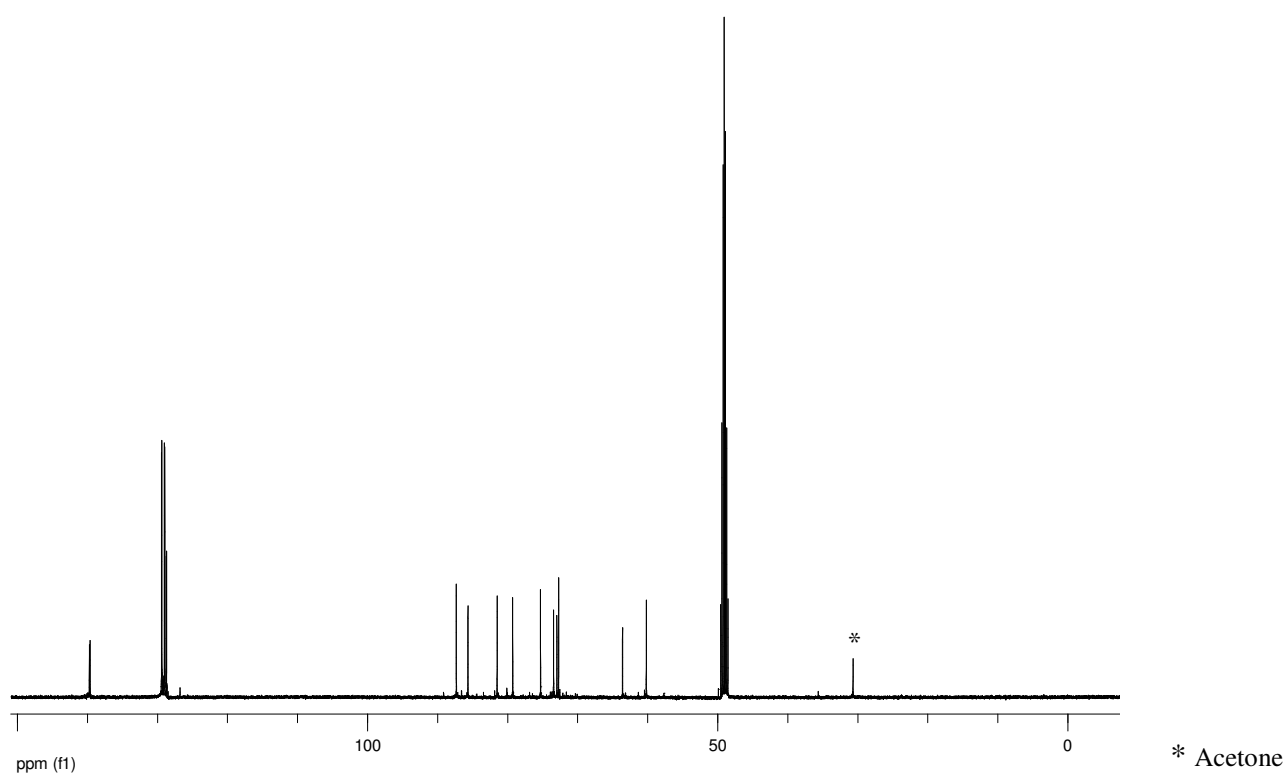

$^1\text{H}$  NMR (500 MHz,  $\text{D}_2\text{O}$ )

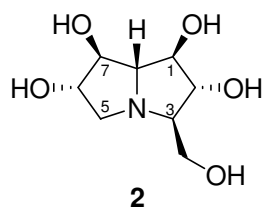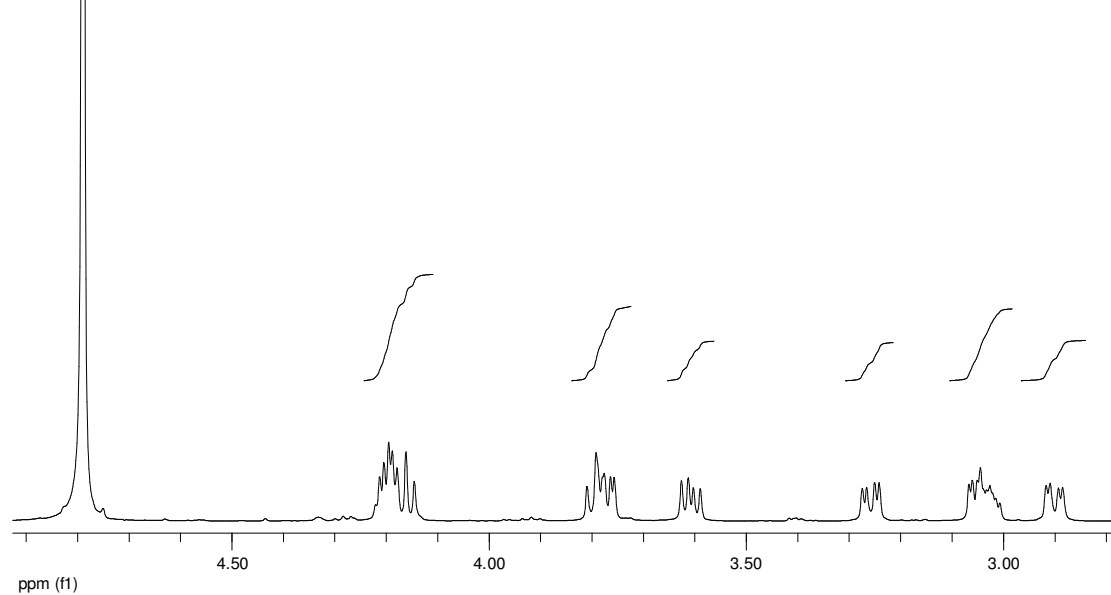

$^{13}\text{C}$  NMR (125 MHz,  $\text{D}_2\text{O}$ )

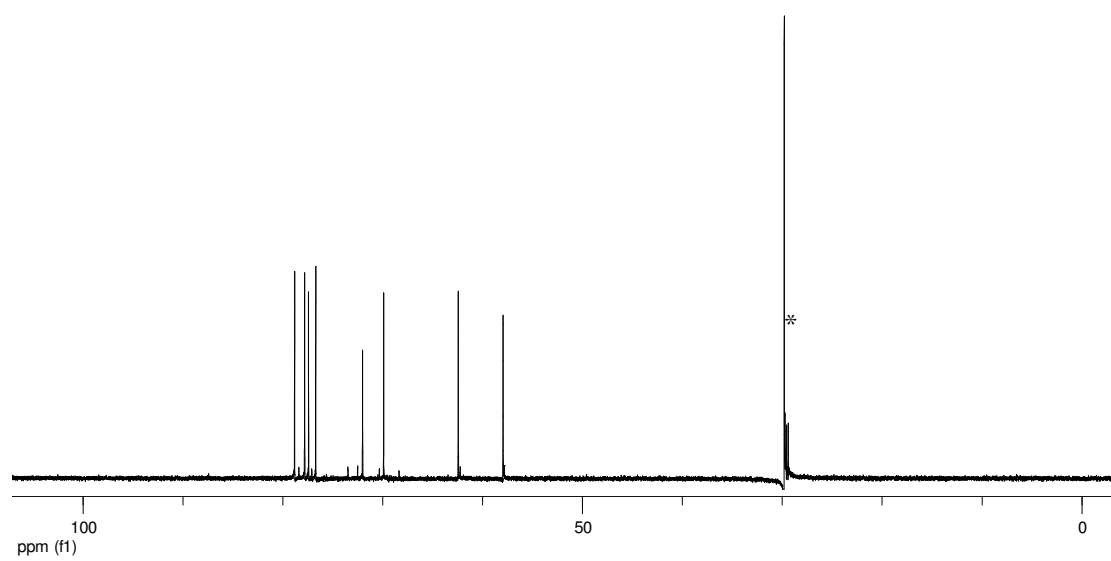

\* Acetone



tr090210\_Rtr086\_casuarine

exp1 s2pu1

| SAMPLE              |                | SPECIAL |          |
|---------------------|----------------|---------|----------|
| date                | Feb 10 2009    | temp    | 25.0     |
| solvent             | D2O            | gain    | not used |
| file                | /nmrdata/pyne~ | spin    | not used |
| /fids/Archive/bup~  |                | hst     | 0.008    |
| 090318/thunwadee/t~ |                | pw90    | 5.400    |
| r090210_Rtr086_cas~ |                | alfa    | 6.600    |
| uarine.fid          |                |         |          |
| ACQUISITION         |                | FLAGS   |          |
| sw                  | 7998.4         | il      | n        |
| at                  | 1.892          | in      | n        |
| np                  | 30266          | dp      | y        |
| fb                  | 4000           | hs      | nn       |
| PROCESSING          |                | DISPLAY |          |
| bs                  | 4              | lb      | 0.50     |
| d1                  | 1.000          | fn      | 32768    |
| nt                  | 64             |         |          |
| ct                  | 64             | sp      | 1393.4   |
| TRANSMITTER         |                | wp      | 806.0    |
| tn                  | H1             | rfl     | 3335.0   |
| sfrq                | 499.915        | rfp     | 2399.6   |
| tof                 | 499.8          | rp      | 149.6    |
| tpwr                | 60             | lp      | -24.8    |
| pw                  | 2.700          | PLOT    |          |
| DECOUPLER           |                | wc      | 250      |
| dn                  | C13            | sc      | 0        |
| dof                 | 0              | vs      | 196      |
| dm                  | nnn            | th      | 2        |
| dmm                 | c              | ai      | cdc ph   |
| dpwr                | 47             |         |          |
| dmf                 | 32258          |         |          |

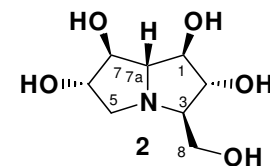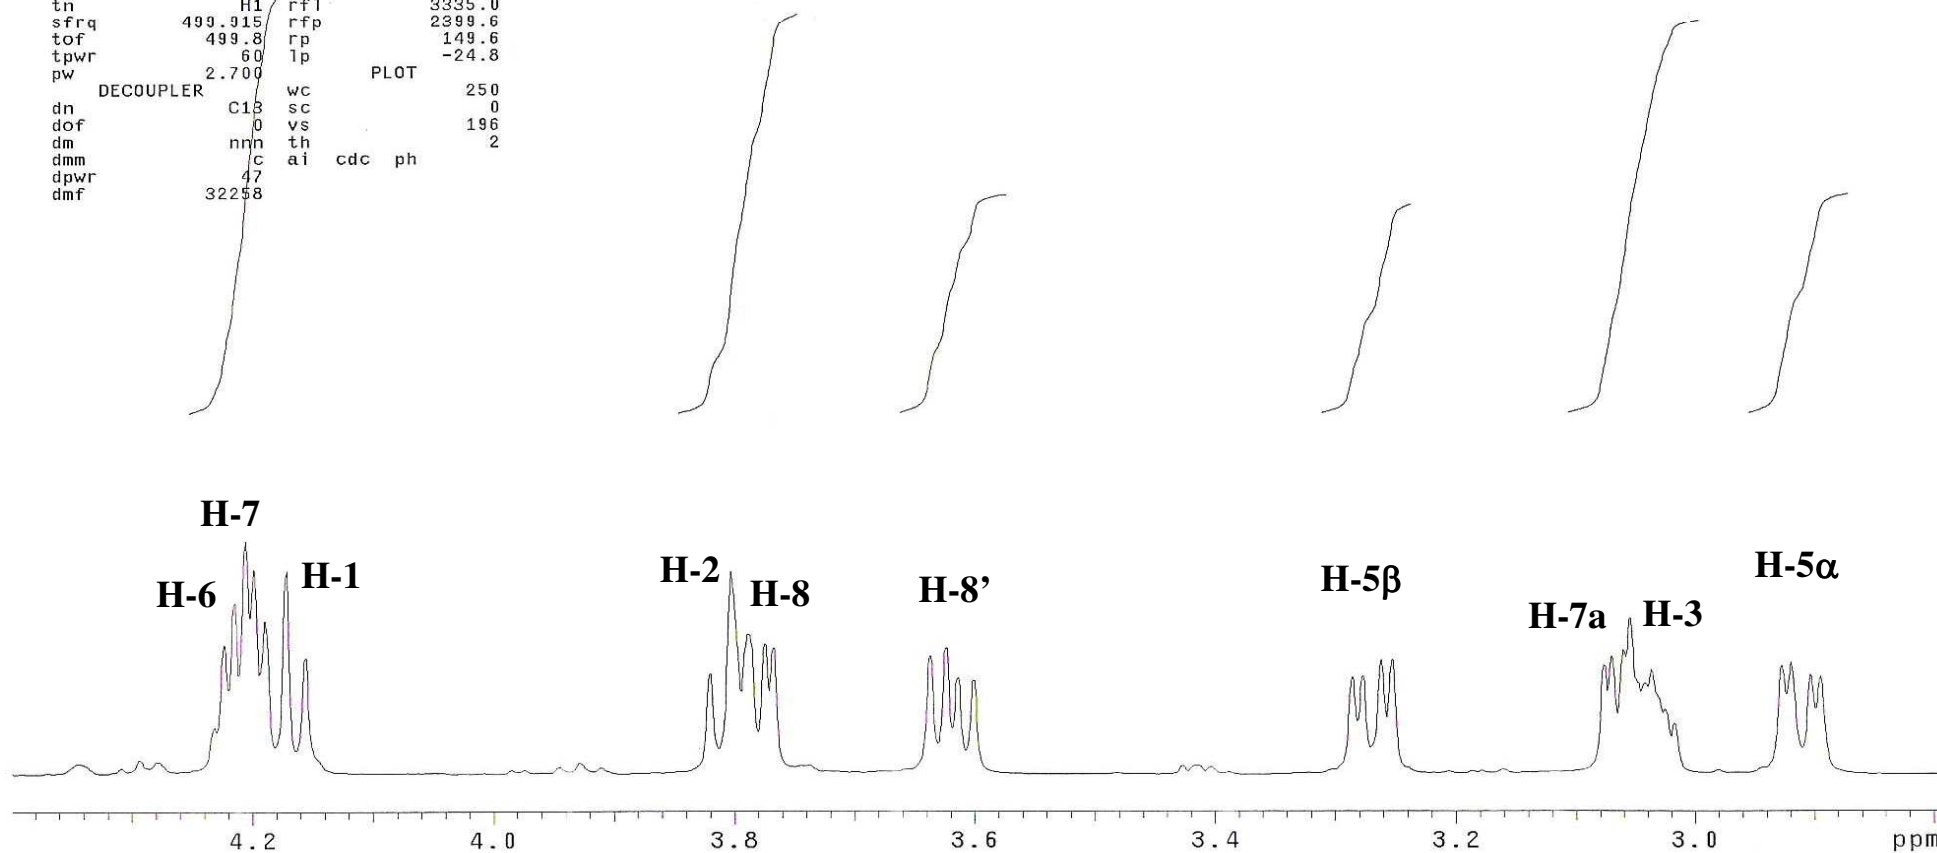

<sup>1</sup>H NMR (500 MHz, D<sub>2</sub>O)

SI- 61 -

tr090210\_Rtr086\_casuarine\_acetone13C

exp3 s2pu1

| SAMPLE              |                | SPECIAL |          |
|---------------------|----------------|---------|----------|
| date                | Feb 10 2009    | temp    | 25.0     |
| solvent             | D2O            | gain    | not used |
| file                | /nmrdata/pyne~ | spin    | not used |
| /fids/Archive/bup~  |                | hst     | 0.008    |
| 090318/thunwadee/T~ |                | pw90    | 15.800   |
| r090210_Rtr086_cas~ |                | alfa    | 6.600    |
| uarine_acetone13C~  |                |         |          |
| ACQUISITION         |                | FLAGS   |          |
| fid                 |                | il      | n        |
| sw                  | 31421.8        | in      | n        |
| at                  | 1.300          | dp      | y        |
| np                  | 81726          | hs      | nn       |
| PROCESSING          |                |         |          |
| fb                  | 17000          | lb      | 0.50     |
| bs                  | 64             | fn      | not used |
| DISPLAY             |                |         |          |
| d1                  | 1.000          | sp      | 6294.7   |
| nt                  | 14028          | wp      | 4647.0   |
| ct                  | 14028          | rfl     | 5708.5   |
| TRANSMITTER         |                |         |          |
| tn                  | C13            | rfp     | 3883.0   |
| sfrq                | 125.717        | rp      | -174.6   |
| tof                 | 1884.1         | lp      | -250.1   |
| PLOT                |                |         |          |
| tpwr                | 63             | wc      | 250      |
| pw                  | 7.900          | sc      | 0        |
| DECOUPLER           |                |         |          |
| dn                  | H1             | vs      | 634      |
| dof                 | 0              | th      | 3        |
| dm                  | YYY            | ai      | cdc ph   |
| dmm                 | w              |         |          |
| dpwr                | 37             |         |          |
| dmf                 | 12821          |         |          |

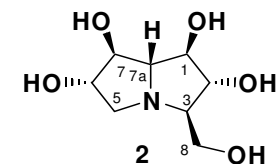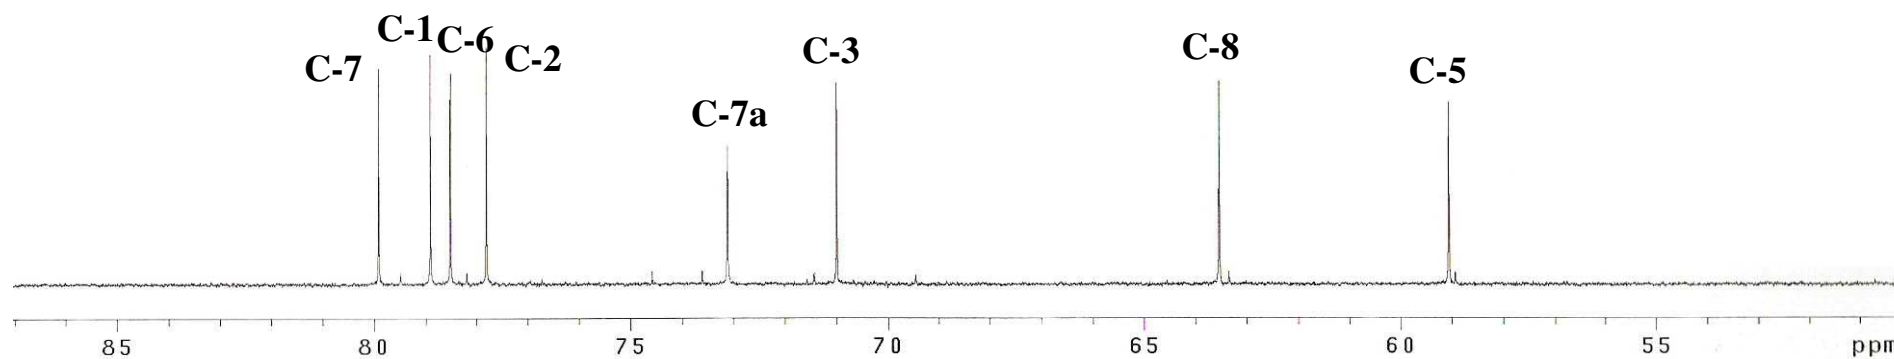

$^{13}\text{C}$  NMR (125 MHz,  $\text{D}_2\text{O}$ )

SI- 62 -

$^1\text{H}$  NMR (500 MHz,  $\text{CDCl}_3$ )

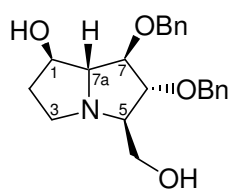

**24 + 25** (minor)

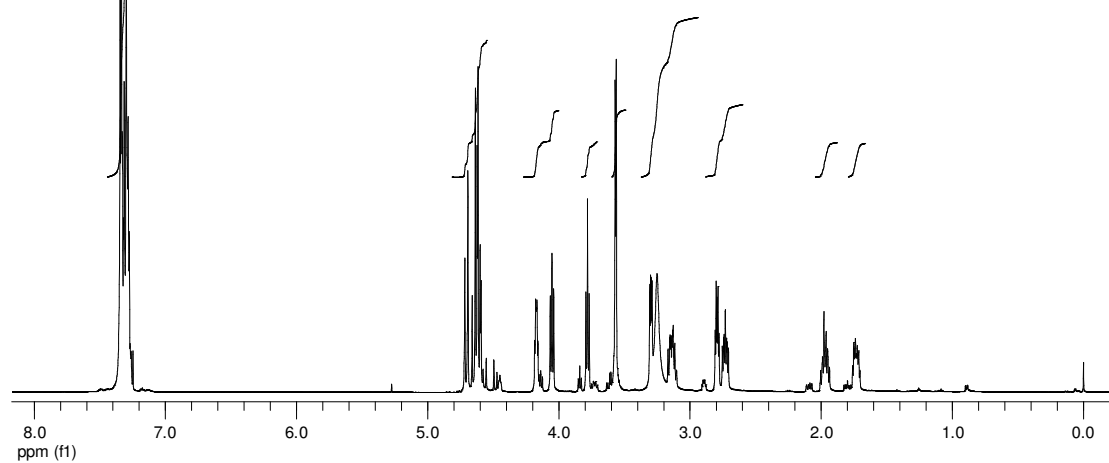

$^{13}\text{C}$  NMR (125 MHz,  $\text{CDCl}_3$ )

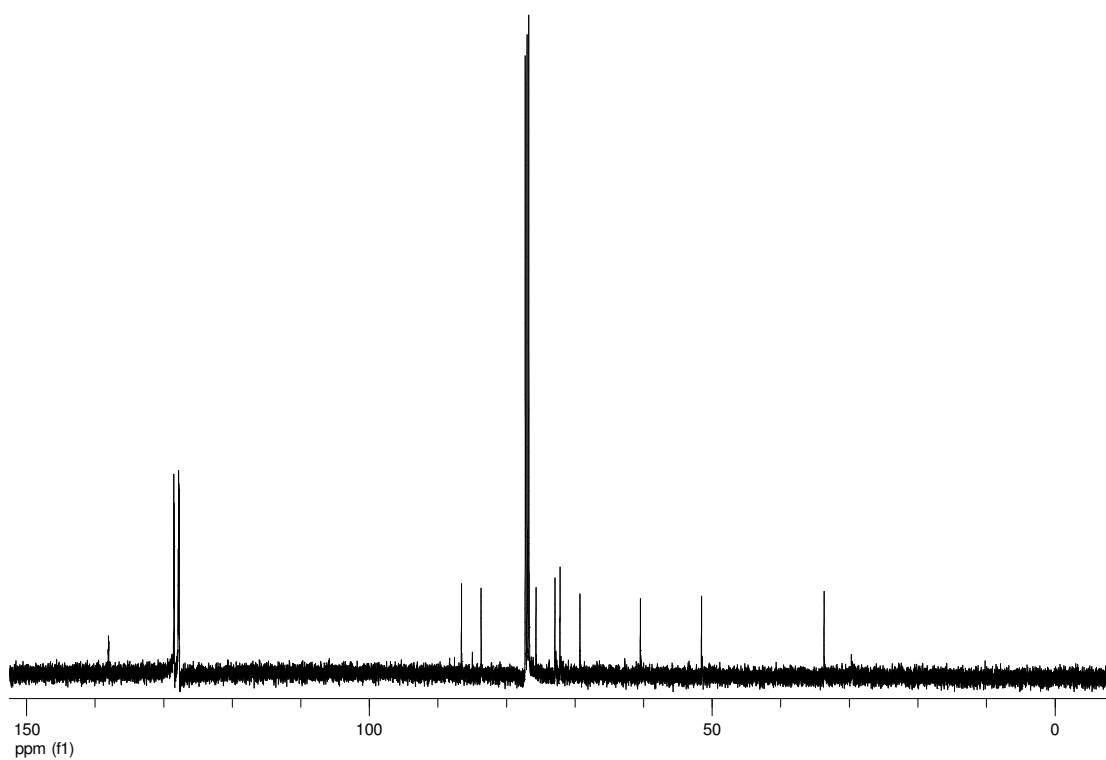

$^1\text{H}$  NMR (500 MHz,  $\text{CDCl}_3$ )

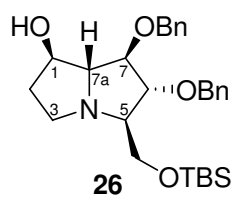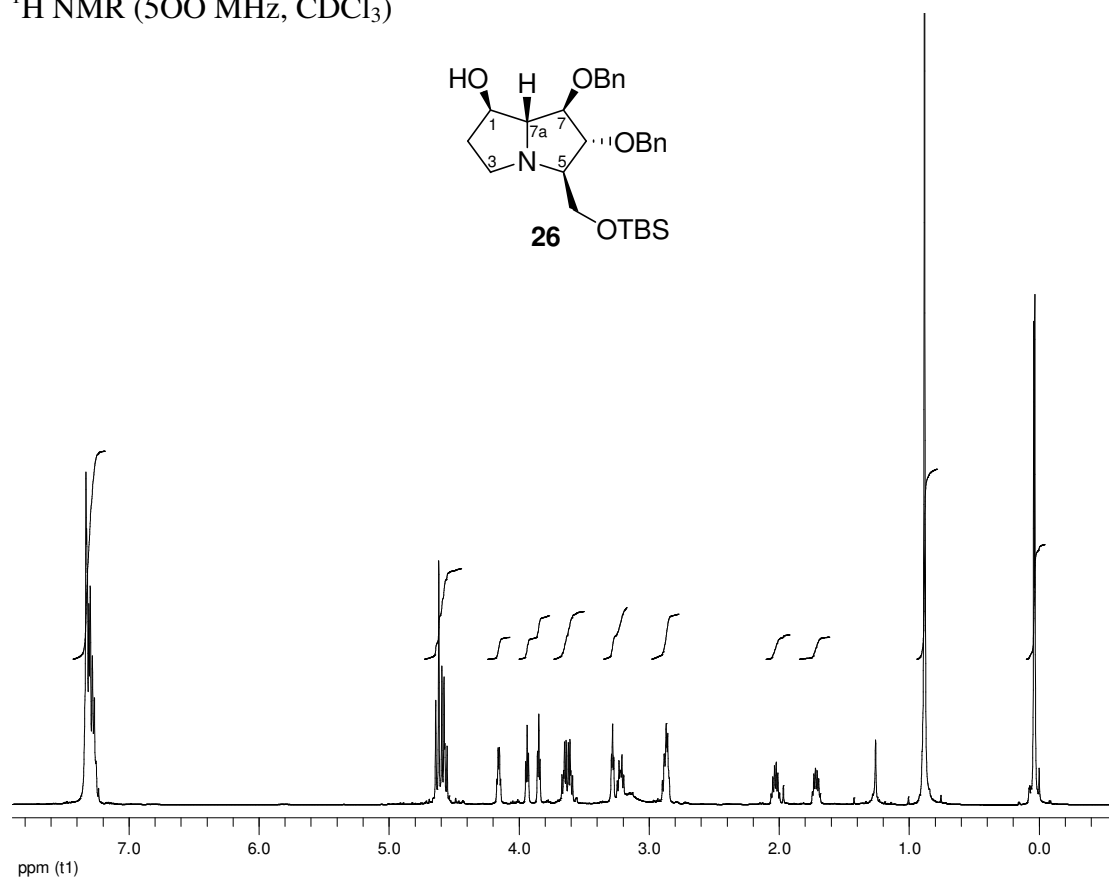

$^{13}\text{C}$  NMR (125 MHz,  $\text{CDCl}_3$ )

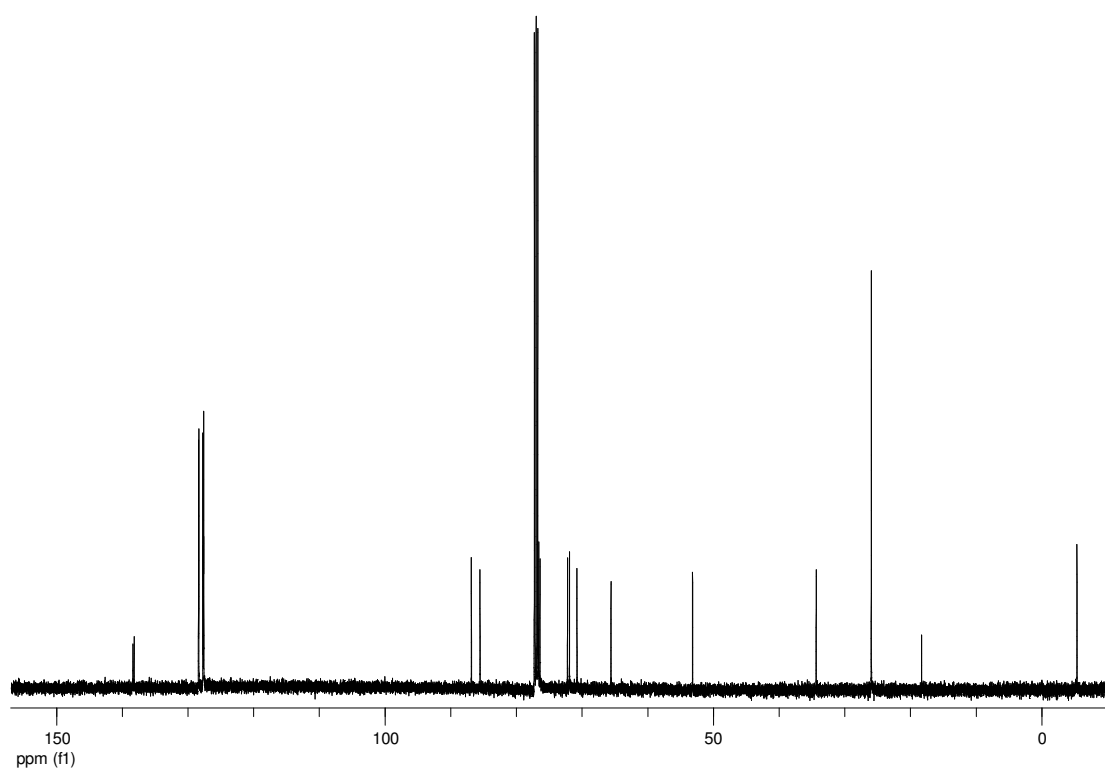

$^1\text{H}$  NMR (500 MHz,  $\text{CDCl}_3$ )

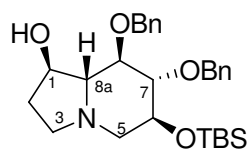

**26a**

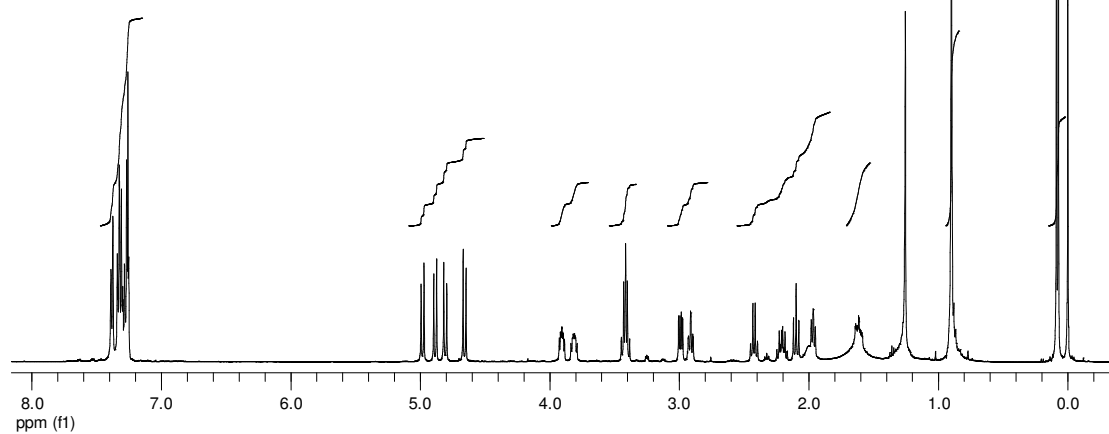

$^{13}\text{C}$  NMR (125 MHz,  $\text{CDCl}_3$ )

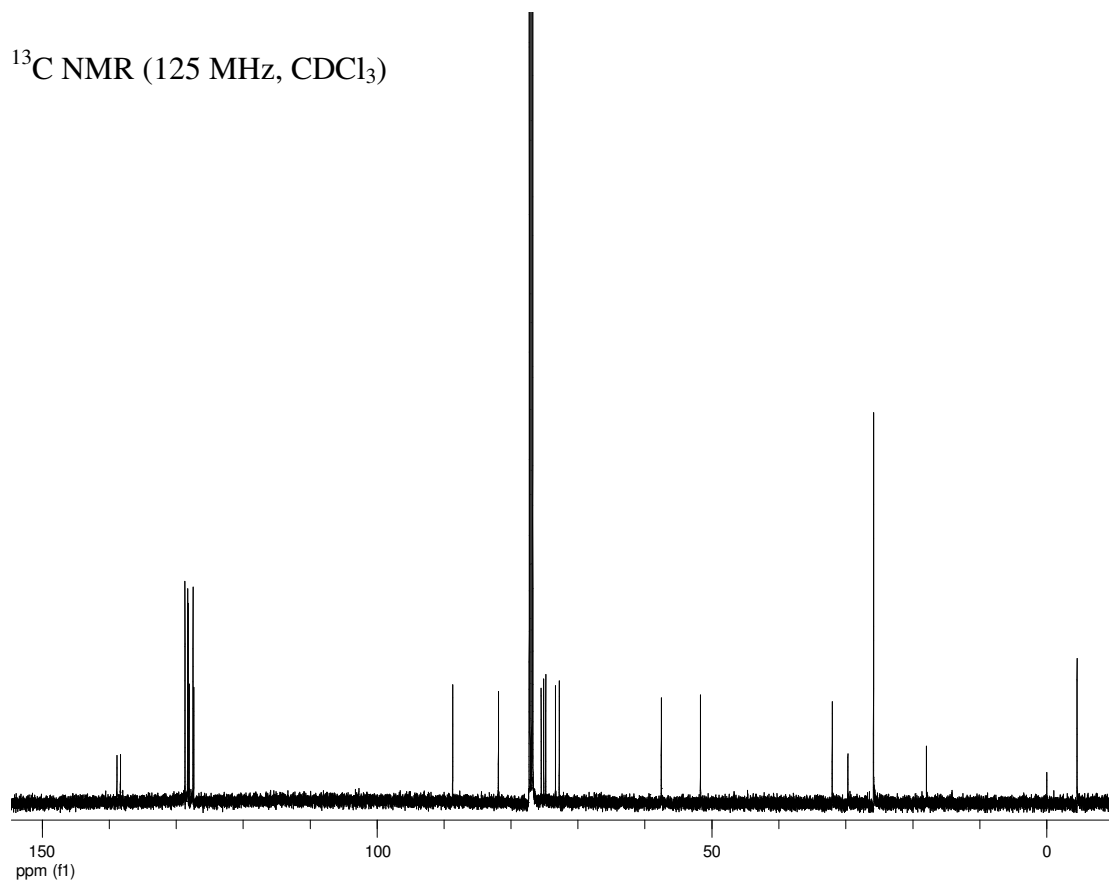

$^1\text{H}$  NMR (500 MHz,  $\text{CDCl}_3$ )

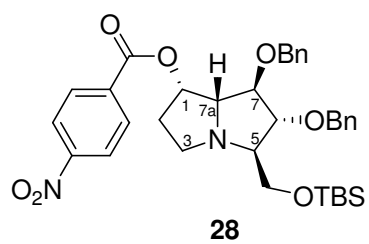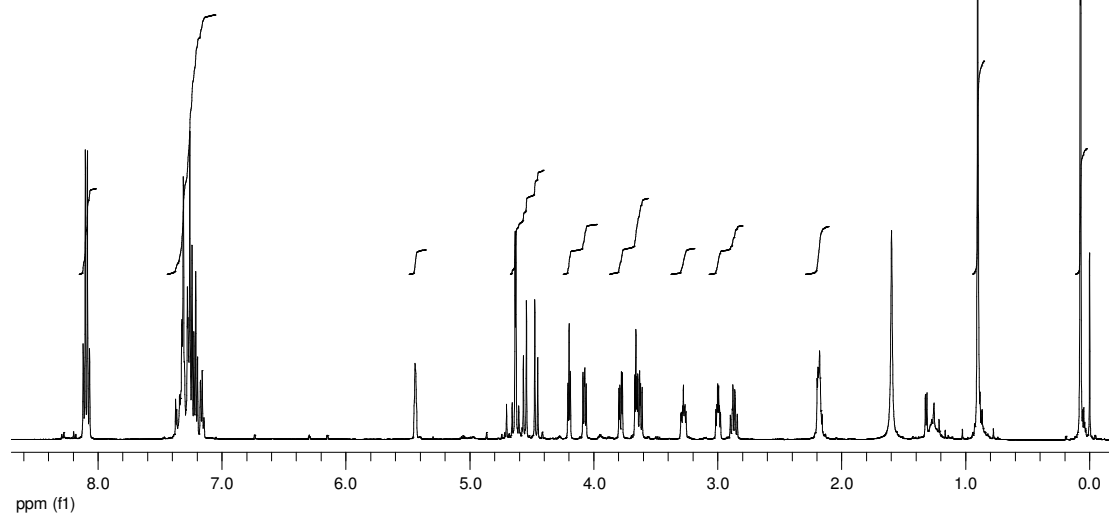

$^{13}\text{C}$  NMR (125 MHz,  $\text{CDCl}_3$ )

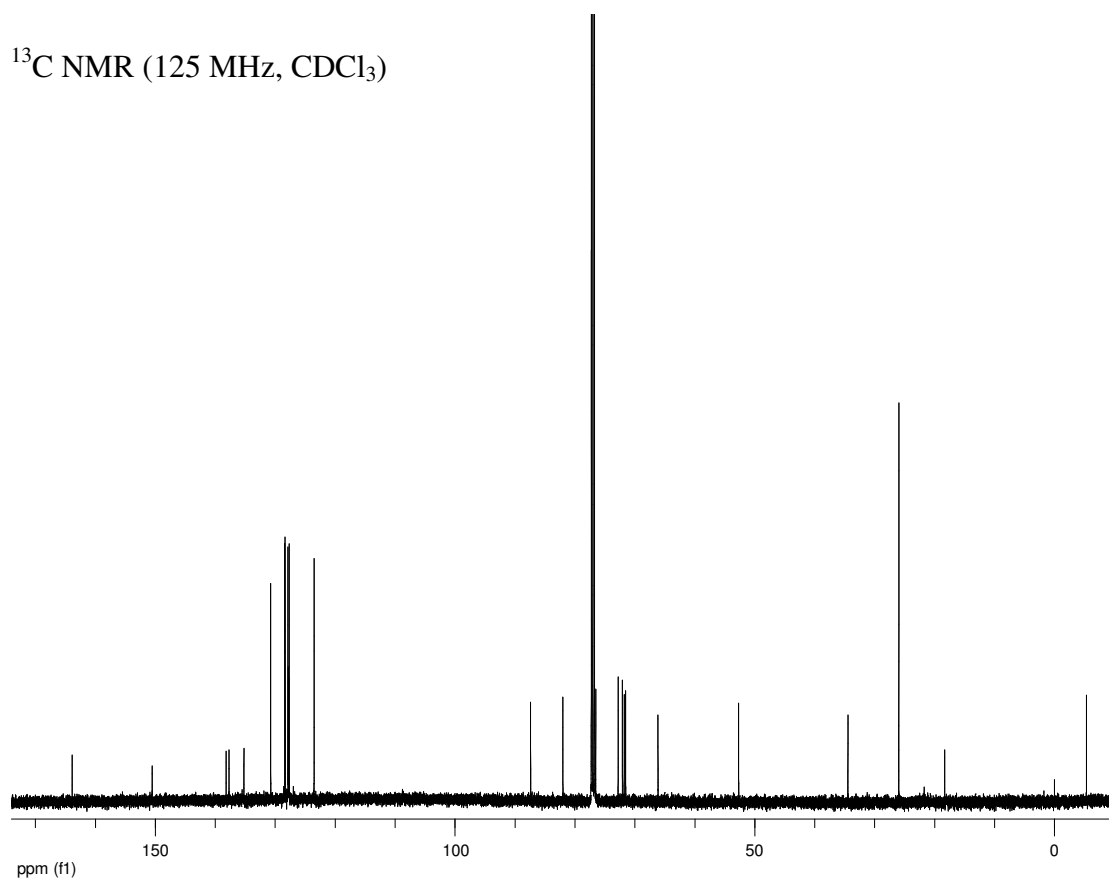

$^1\text{H}$  NMR (500 MHz,  $\text{CDCl}_3$ )

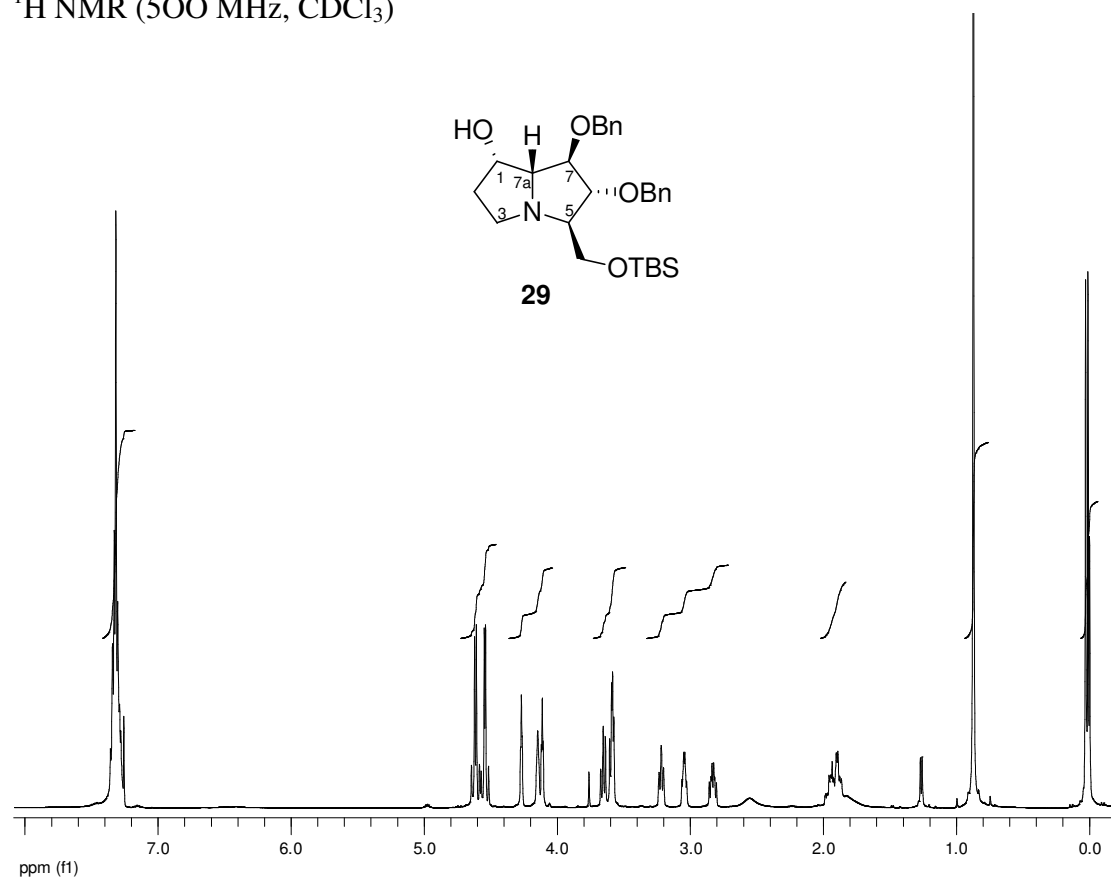

$^{13}\text{C}$  NMR (125 MHz,  $\text{CDCl}_3$ )

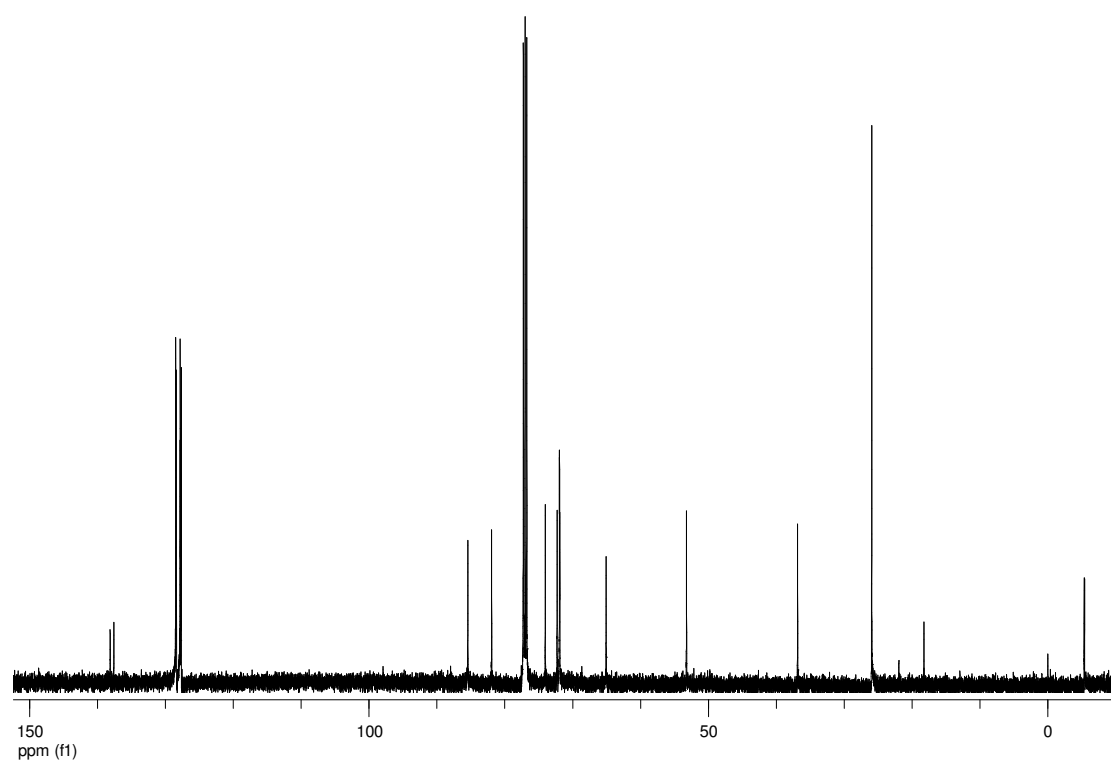

$^1\text{H}$  NMR (500 MHz,  $\text{D}_2\text{O}$ )

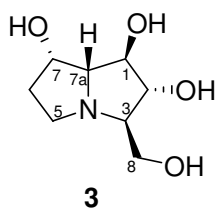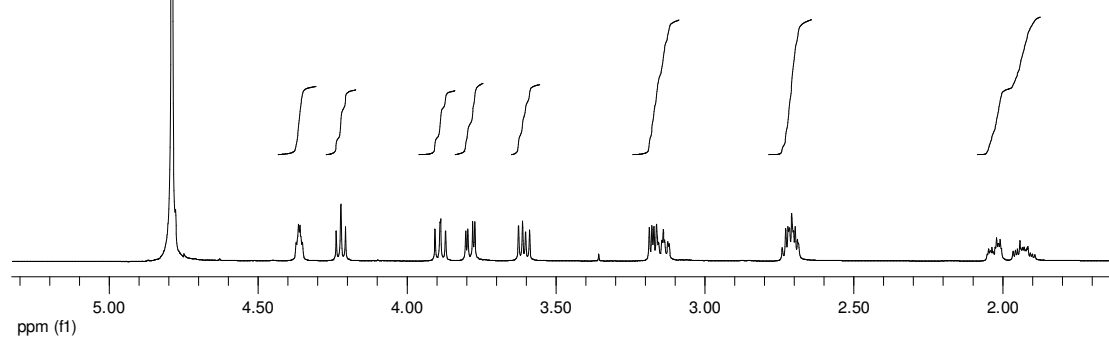

$^{13}\text{C}$  NMR (125 MHz,  $\text{D}_2\text{O}$ )

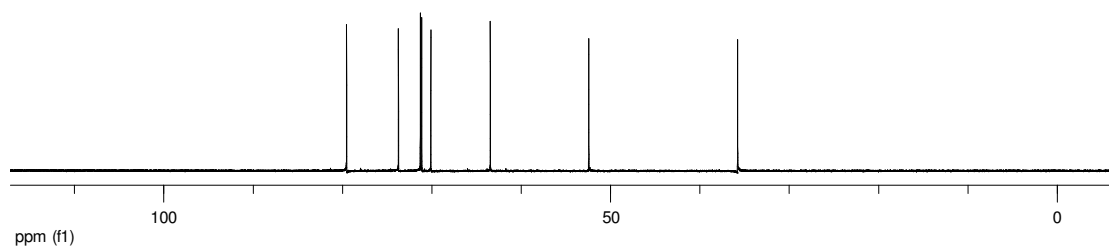



tr090321\_Rtr107

exp3 s2pu1

SAMPLE  
date Mar 21 2009 temp 25.0  
solvent D2O gain not used  
file /nmrdata/pyne~ spin not used  
/fids/Archive/bup~ hst 0.008  
090617/thunwadee/t~ pw90 5.400  
r090321\_Rtr107.fid alfa 6.600

ACQUISITION  
sw 7998.4 il n  
at 1.892 in n  
np 30266 dp y  
fb 4000 hs nn  
bs 4  
d1 1.000 lb 0.50  
nt 64 fn not used  
ct 64

TRANSMITTER  
tn H1 sp 848.0  
sfrq 499.915 wf 1447.6  
tof 499.8 rfl 3325.7  
tpwr 60 rfp 2399.6  
pw 2.700 lp -58.8  
-30.8

DECOUPLER  
dn C13 wc 250  
dof 0 sc 0  
dm nnn vs 135  
dmm c th 2  
dpwr 47 ai cdc ph  
dmf 32258

PROCESSING  
DISPLAY

PLOT

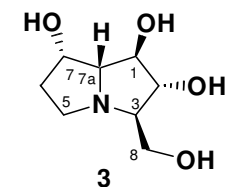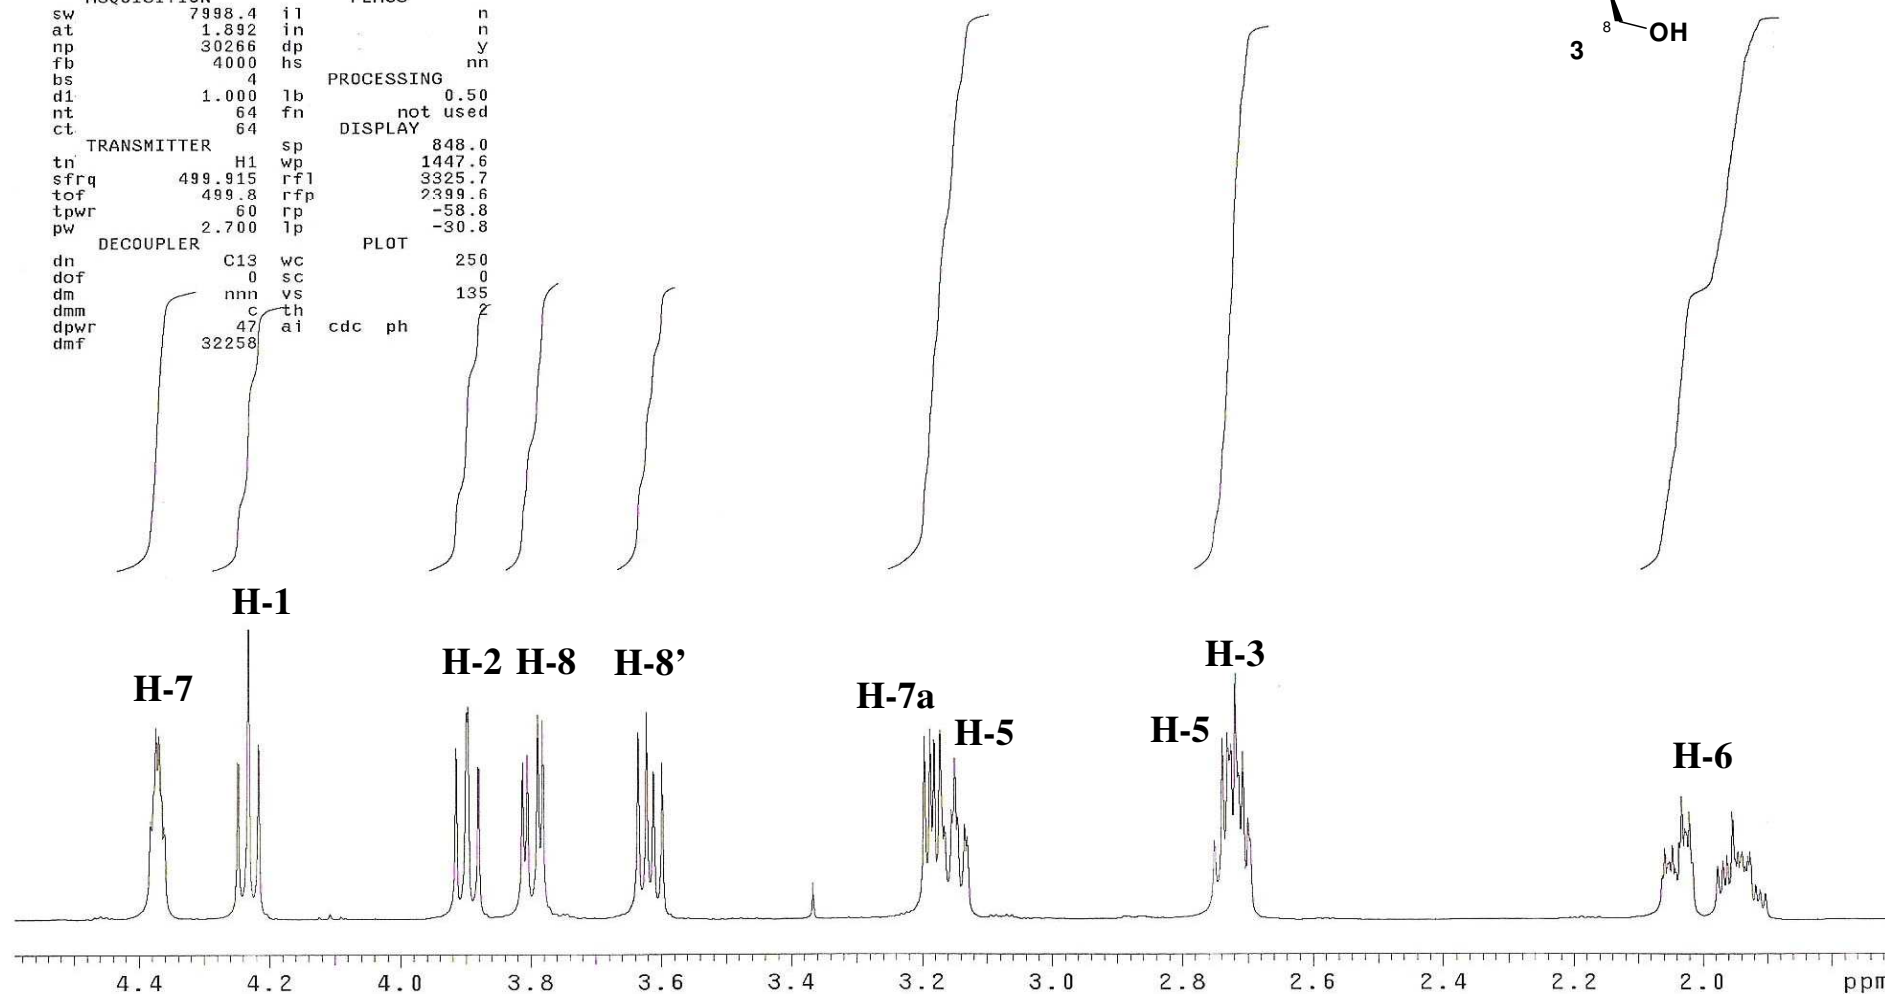

<sup>1</sup>H NMR (500 MHz, D<sub>2</sub>O)

SI- 69 -

tr090327\_Rtr107-13C-ACN

exp3 s2pu1

SAMPLE *D<sub>2</sub>O* SPECIAL  
date Mar 27 2009 temp 25.0  
solvent *CDC13* gain not used  
file /nmrdata/pyne~ spin not used  
/fids/Archive/bup~ hst 0.008  
090617/thunwadee/t~ pw90 15.800  
r090327\_Rtr107-13C~ alfa 6.600  
-ACN.fid  
ACQUISITION il n  
sw 31421.8 in n  
at 1.300 dp y  
np 81726 hs nn  
fb 17000  
bs 64 lb 1.00  
d1 1.000 fn not used  
nt 1556  
ct 1462 sp 2490.1  
TRANSMITTER wp 8841.4  
tn C13 rfl 2335.0  
sfrq 125.716 rfp 184.8  
tof 1884.0 rp 167.7  
tpwr 63 lp -215.0  
pw 7.900 PLOT  
DECOUPLER wc 250  
dn H1 sc 0  
dof 0 vs 519  
dm YYY th 8  
dmm w ai cdc ph  
dpwr 37  
dmf 12821

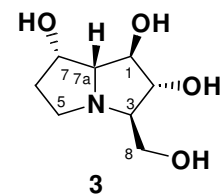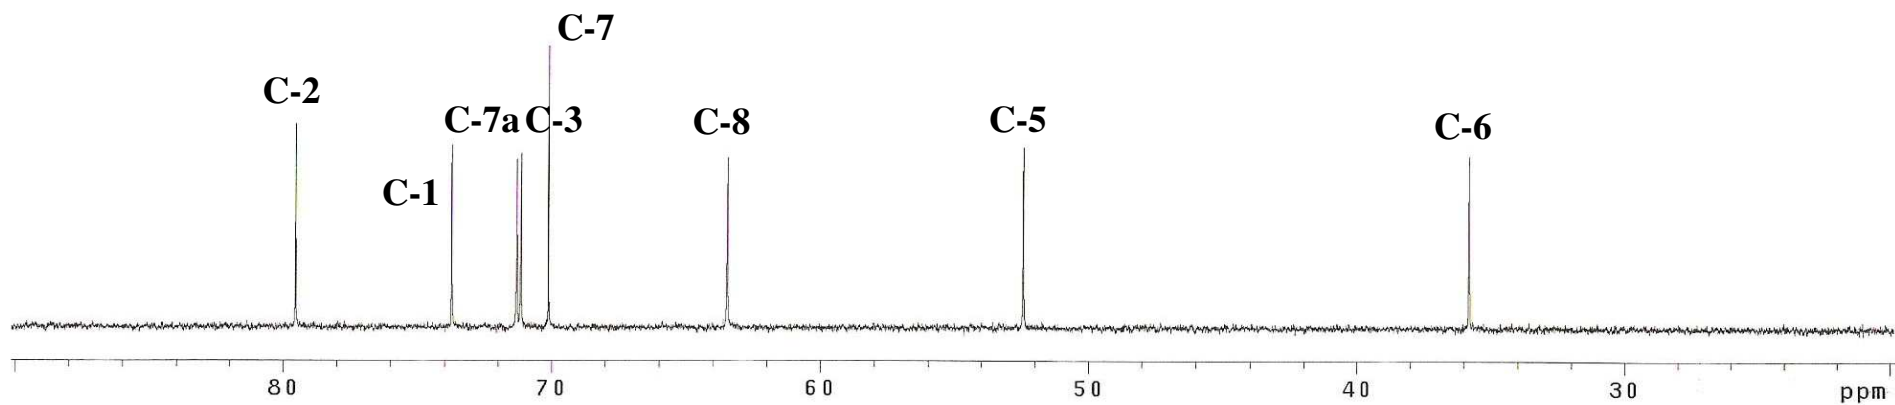

<sup>13</sup>C NMR (125 MHz, D<sub>2</sub>O)

SI- 70 -

tr090321\_Rtr107-gCOSY

Archive directory: /export/home/pyne/vnmrsys/data  
Sample directory:

Pulse Sequence: gCOSY

Solvent: D2O  
Temp. 25.0 C / 298.1 K  
File: tr090321\_Rtr107-gCOSY  
INOVA-500 "wuhrich"

Relax. delay 1.000 sec  
Acq. time 0.128 sec  
Width 7998.4 Hz  
2D Width 7998.4 Hz  
32 repetitions  
256 increments  
OBSERVE H1, 499.9119776 MHz  
DATA PROCESSING  
line broadening 3.0 Hz  
Sq. sine bell 0.064 sec  
F1 DATA PROCESSING  
line broadening 3.0 Hz  
Sq. sine bell 0.016 sec  
FT size 2048 x 1024  
Total time 2 hr, 38 min, 16 sec

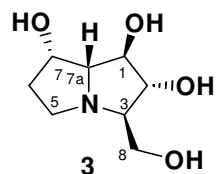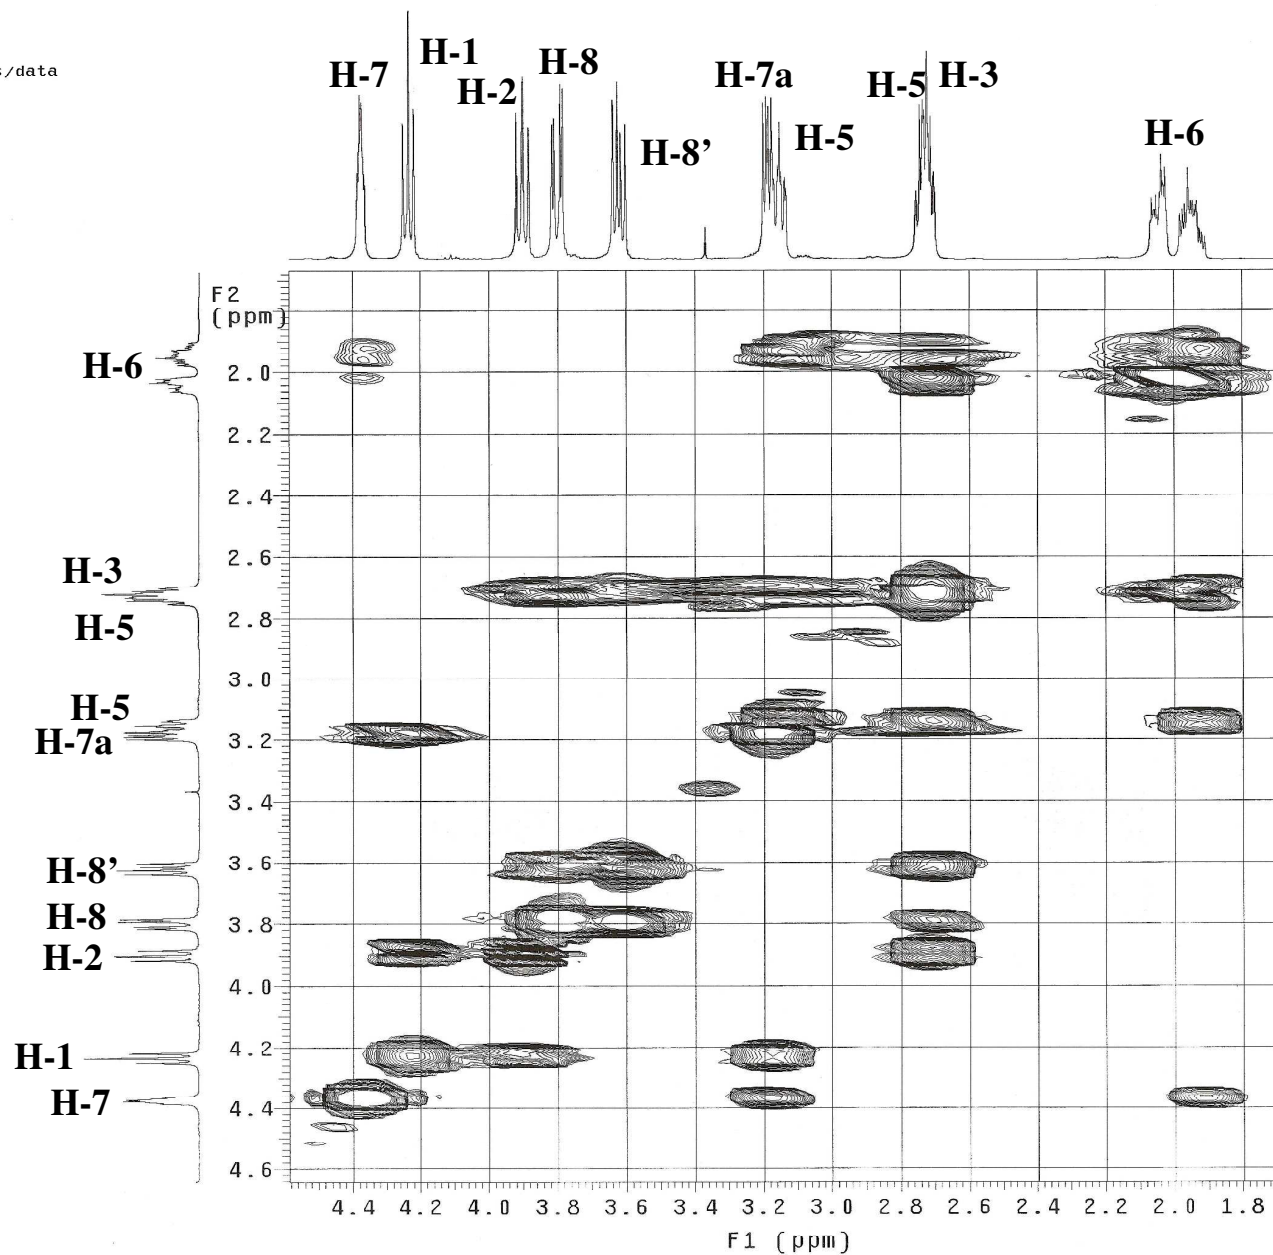

COSY (500 MHz, D<sub>2</sub>O)

SI- 71 -

tr090321\_Rtr107-gHSQC

Archive directory: /export/home/pyne/vnmrsys/data  
Sample directory:

Pulse Sequence: gHSQC

Solvent: D2O  
Temp. 25.0 C / 298.1 K  
User: 1-14-87  
File: tr090321\_Rtr107-gHSQC  
INOVA-500 "wuthrich"

Relax. delay 1.000 sec  
Acq. time 0.128 sec  
Width 7998.4 Hz  
2D Width 21367.5 Hz  
64 repetitions  
2 x 256 increments  
OBSERVE H1, 499.9119726 MHz  
DECOUPLE C13, 125.7123834 MHz  
Power 47 dB  
on during acquisition  
off during delay  
W40 triax modulated  
DATA PROCESSING  
Line broadening 3.0 Hz  
Gauss apodization 0.064 sec  
F1 DATA PROCESSING  
Line broadening 3.0 Hz  
Gauss apodization 0.006 sec  
FT size 2048 x 1024  
Total time 10 hr, 57 min, 2 sec

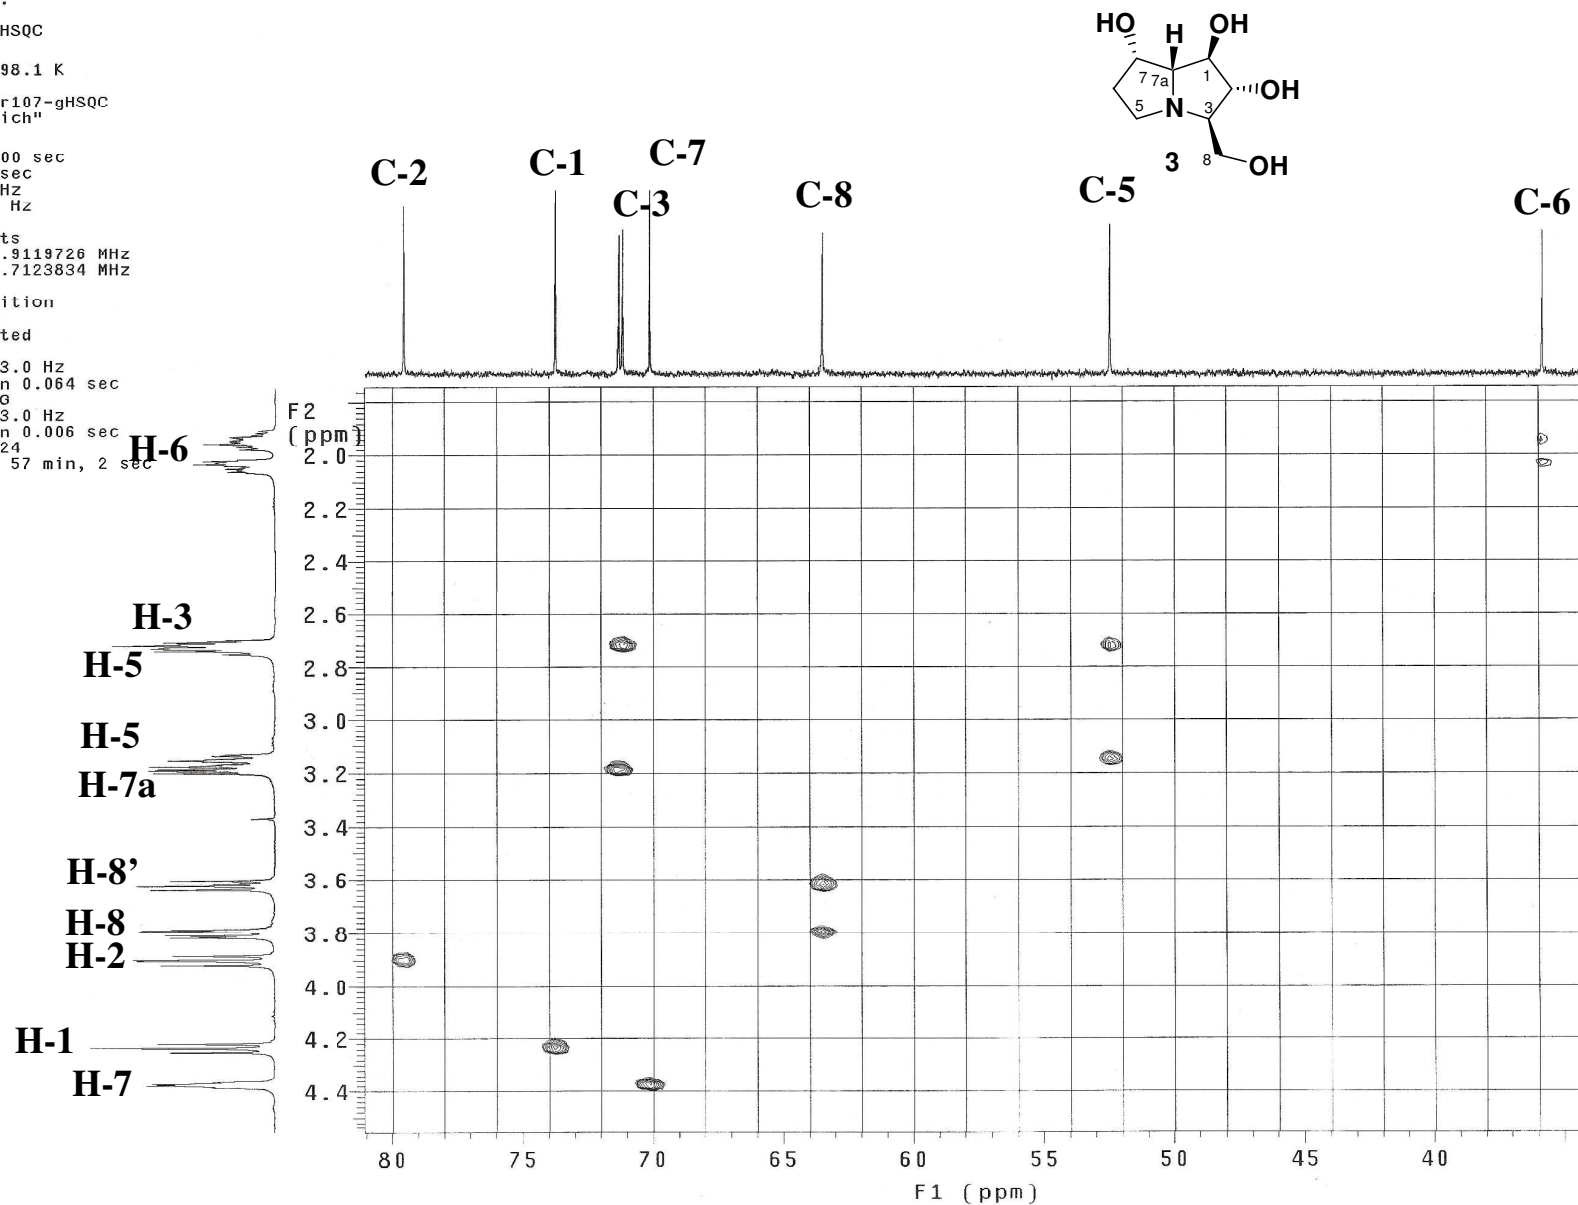

tr090321\_Rtr107-gHMBC

Archive directory: /export/home/pyne/vnmrsys/data  
Sample directory:

Pulse Sequence: gHMBC

Solvent: D2O  
Temp. 25.0 C / 298.1 K  
User: 1-14-87  
File: tr090321\_Rtr107-gHMBC  
INOVA-500 "wuthrich"

Relax. delay 1.000 sec  
Acq. time 0.128 sec  
Width 7998.4 Hz  
2D Width 30165.9 Hz  
128 repetitions  
256 increments  
OBSERVE H1, 499.9119720 MHz  
DATA PROCESSING  
Line broadening 3.0 Hz  
Sq. sine bell 0.064 sec  
F1 DATA PROCESSING  
Line broadening 3.0 Hz  
Sq. sine bell 0.004 sec  
FT size 2048 x 1024  
Total time 11 hr, 3 min, 20 sec

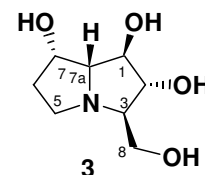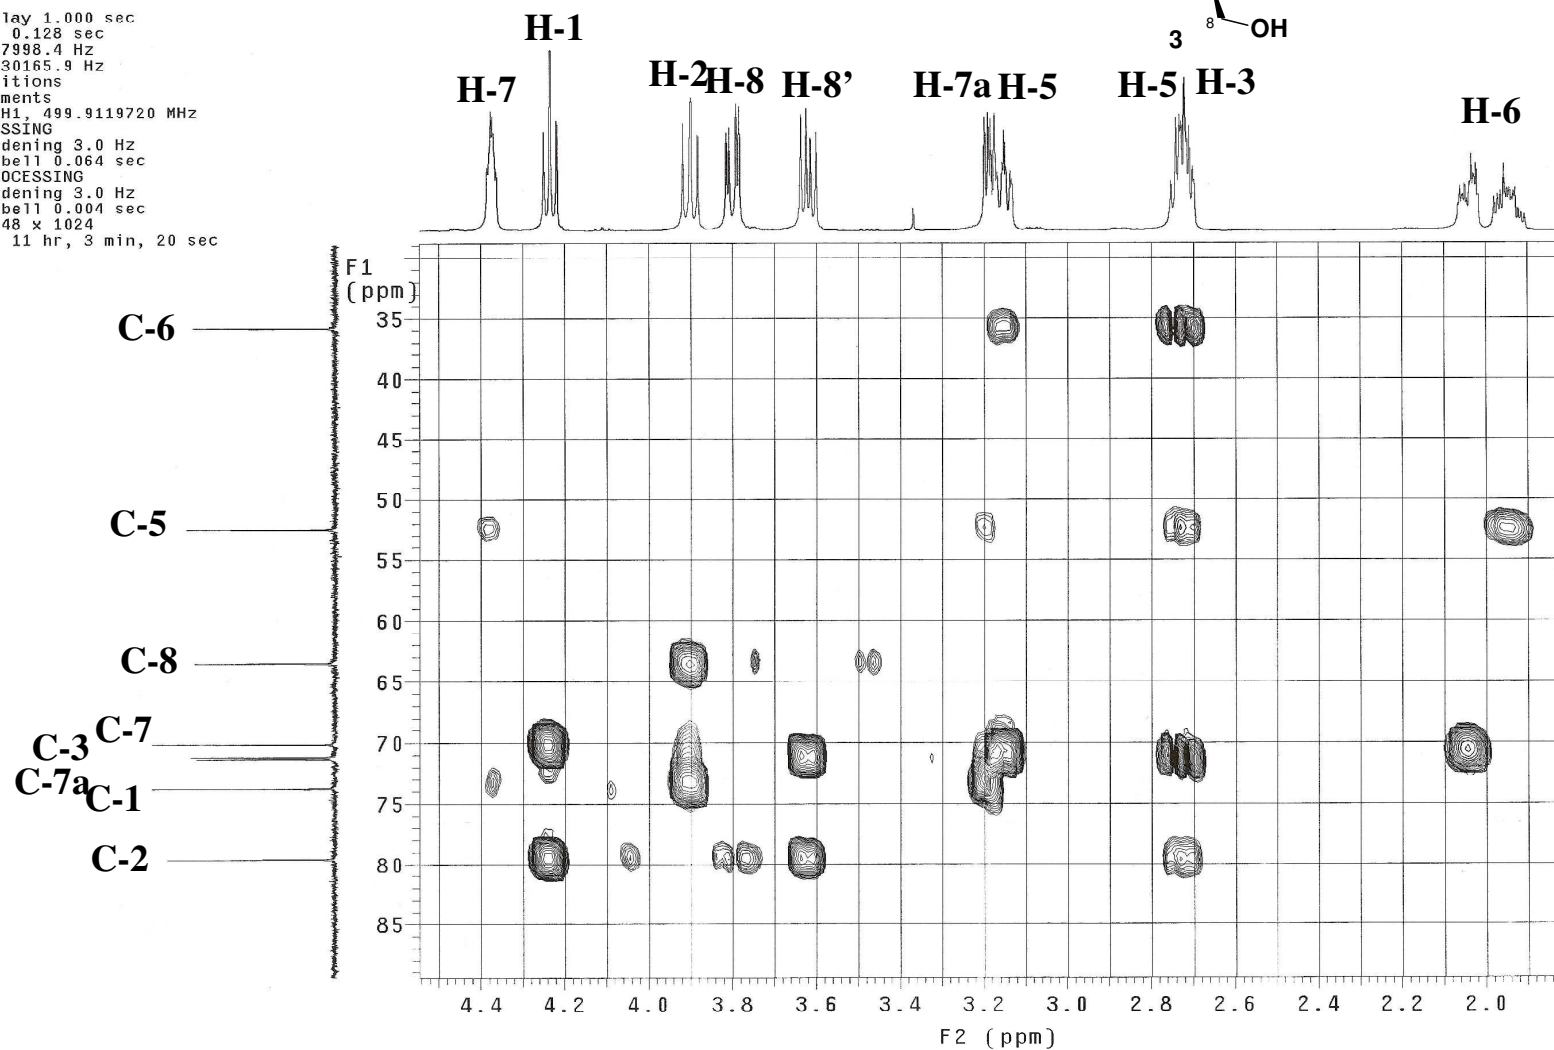

HMBC (500 MHz, D<sub>2</sub>O)

SI- 73 -

<sup>1</sup>H NMR (500 MHz, D<sub>2</sub>O)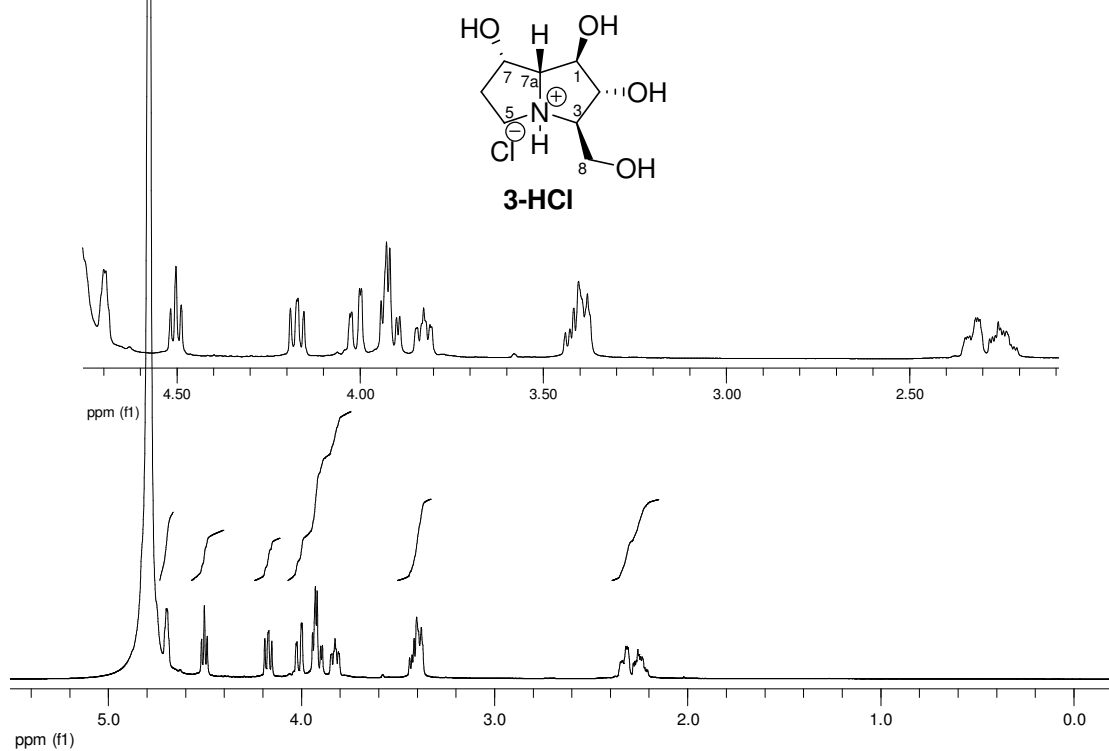<sup>13</sup>C NMR (125 MHz, D<sub>2</sub>O)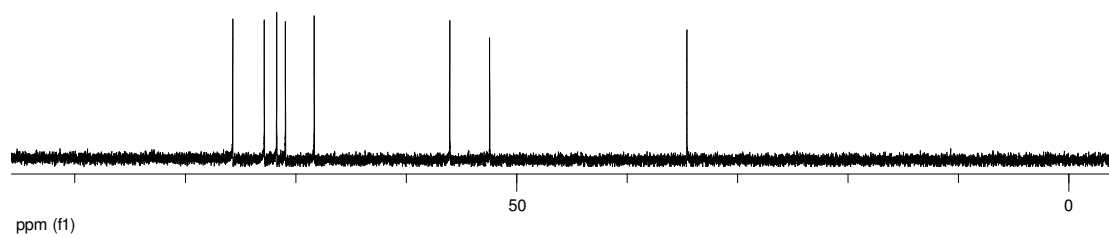

$^1\text{H}$  NMR (500 MHz,  $\text{CDCl}_3$ )

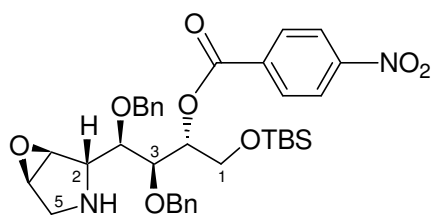

**30a + 2-OTBS, 1-4- $\text{NO}_2\text{C}_6\text{H}_4\text{CO}$  analog**

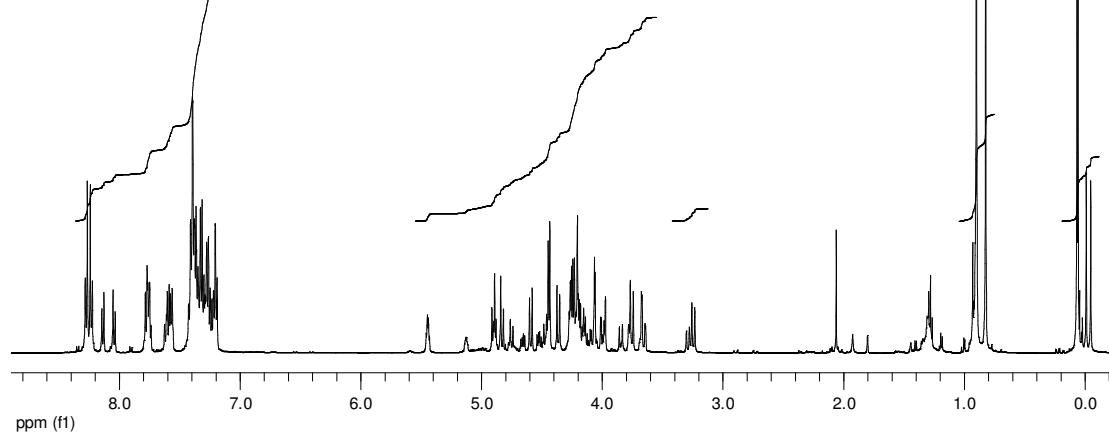

$^{13}\text{C}$  NMR (125 MHz,  $\text{CDCl}_3$ )

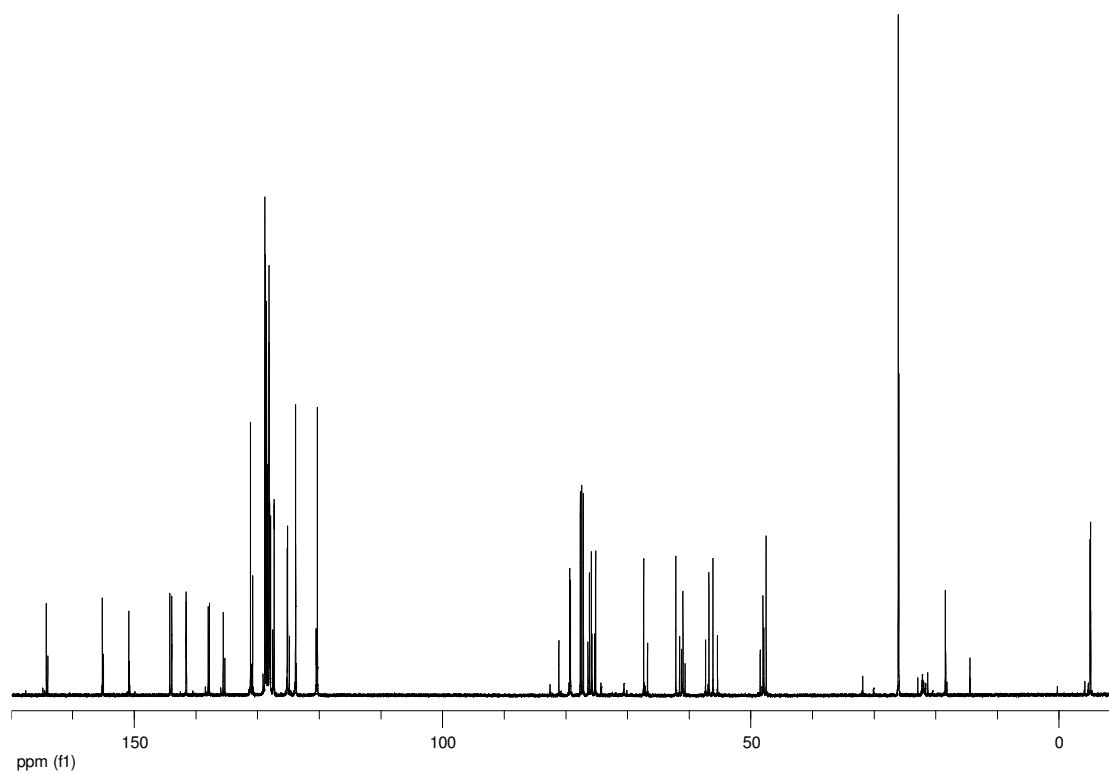

$^1\text{H}$  NMR (500 MHz,  $\text{CDCl}_3$ )

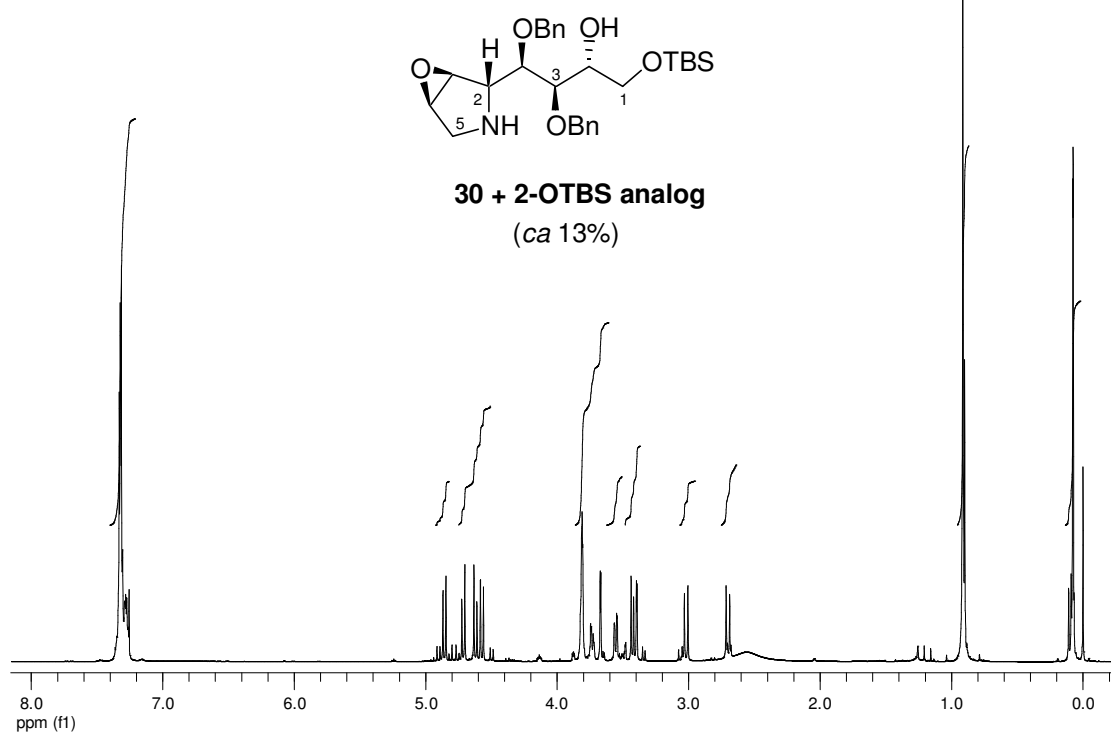

$^{13}\text{C}$  NMR (125 MHz,  $\text{CDCl}_3$ )

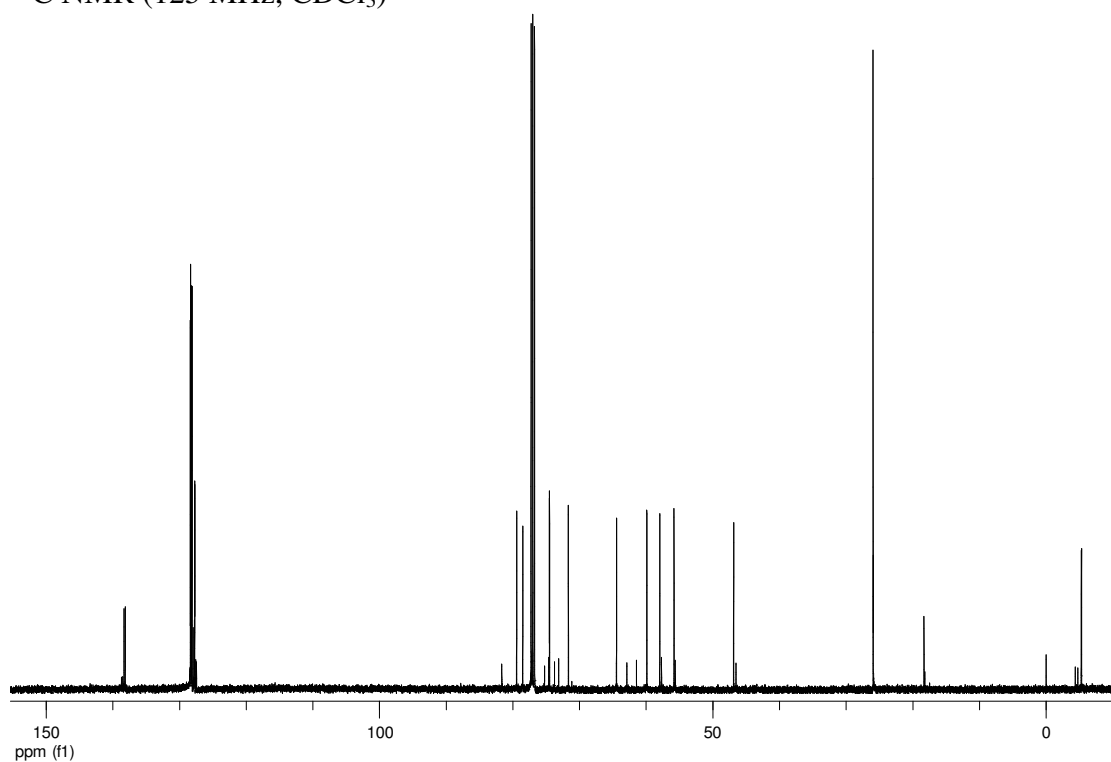



$^1\text{H}$  NMR (500 MHz,  $\text{CDCl}_3$ )

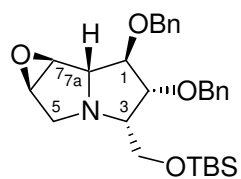

**31 + 32** (minor)

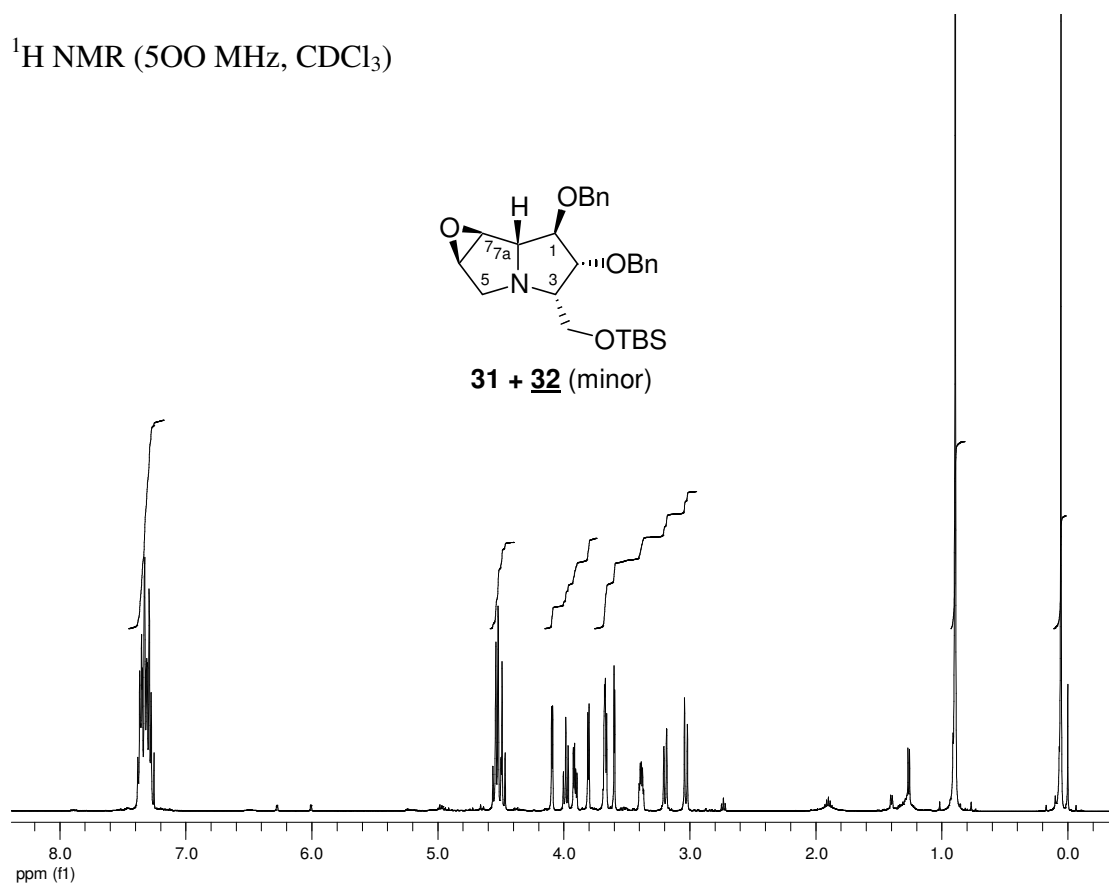

$^{13}\text{C}$  NMR (125 MHz,  $\text{CDCl}_3$ )

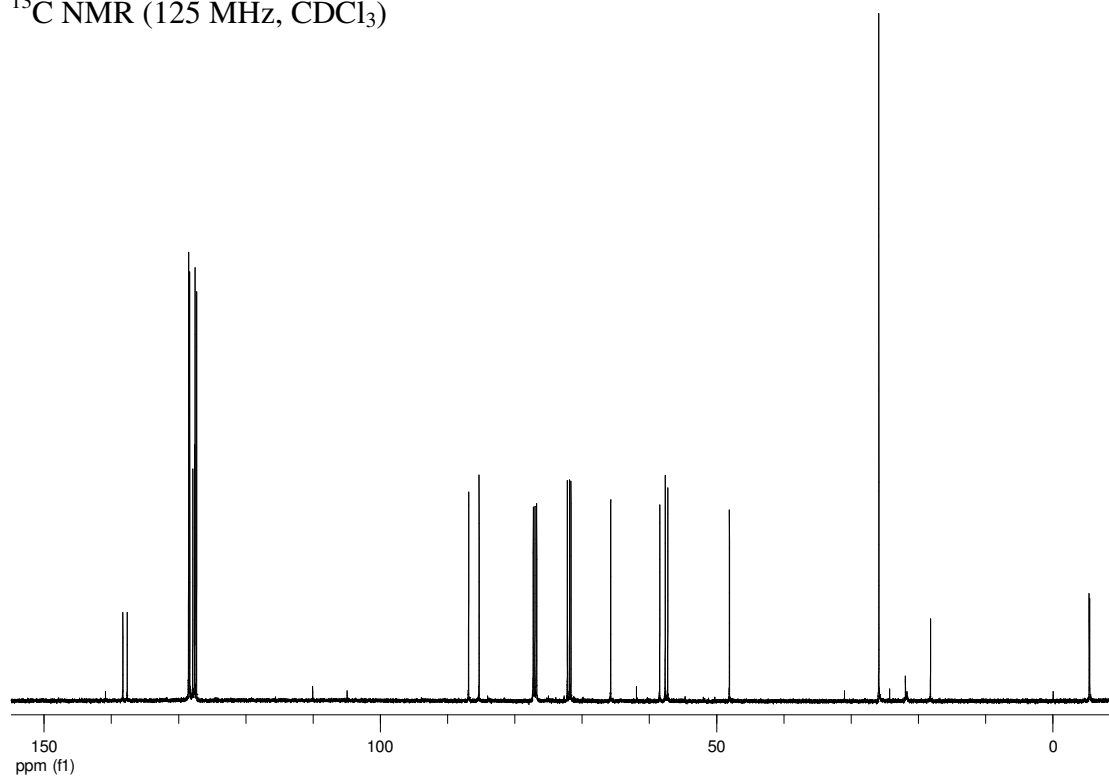

$^1\text{H}$  NMR (500 MHz,  $\text{CDCl}_3$ )

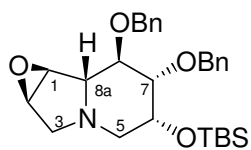

**32 + 31** (minor)

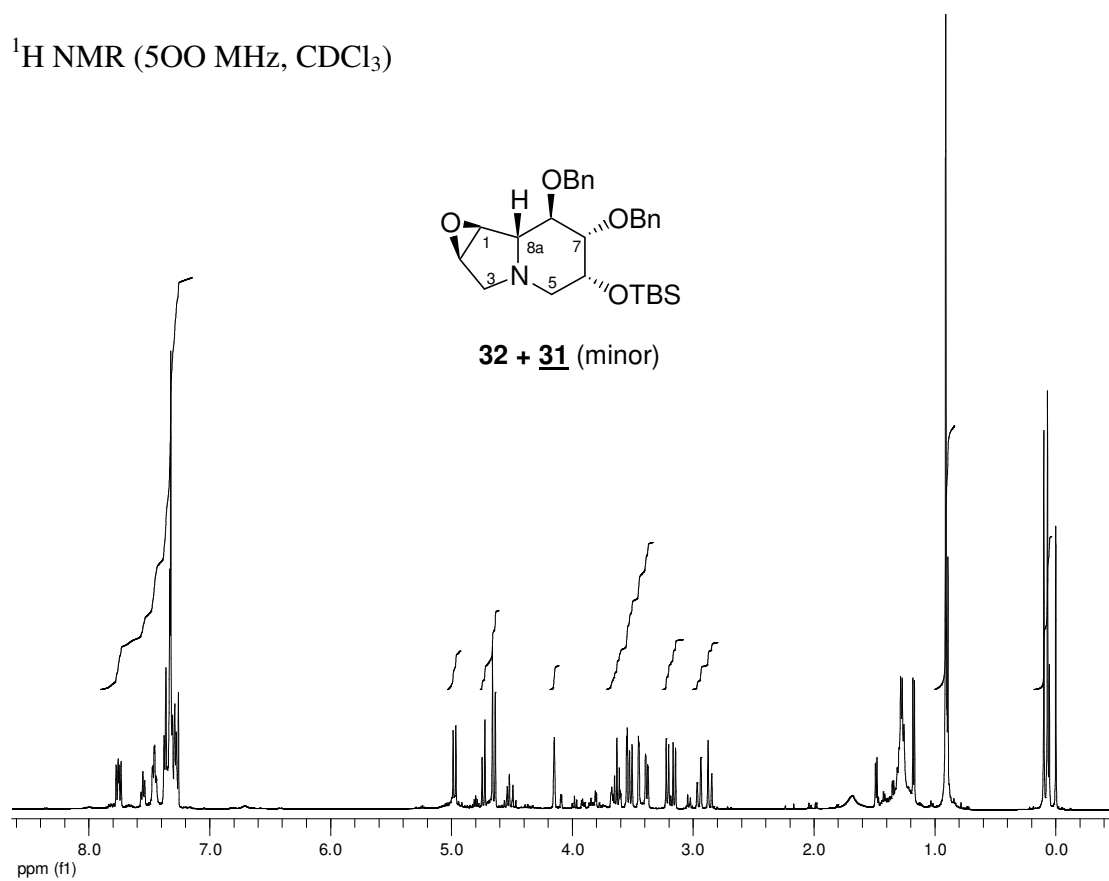

$^{13}\text{C}$  NMR (125 MHz,  $\text{CDCl}_3$ )

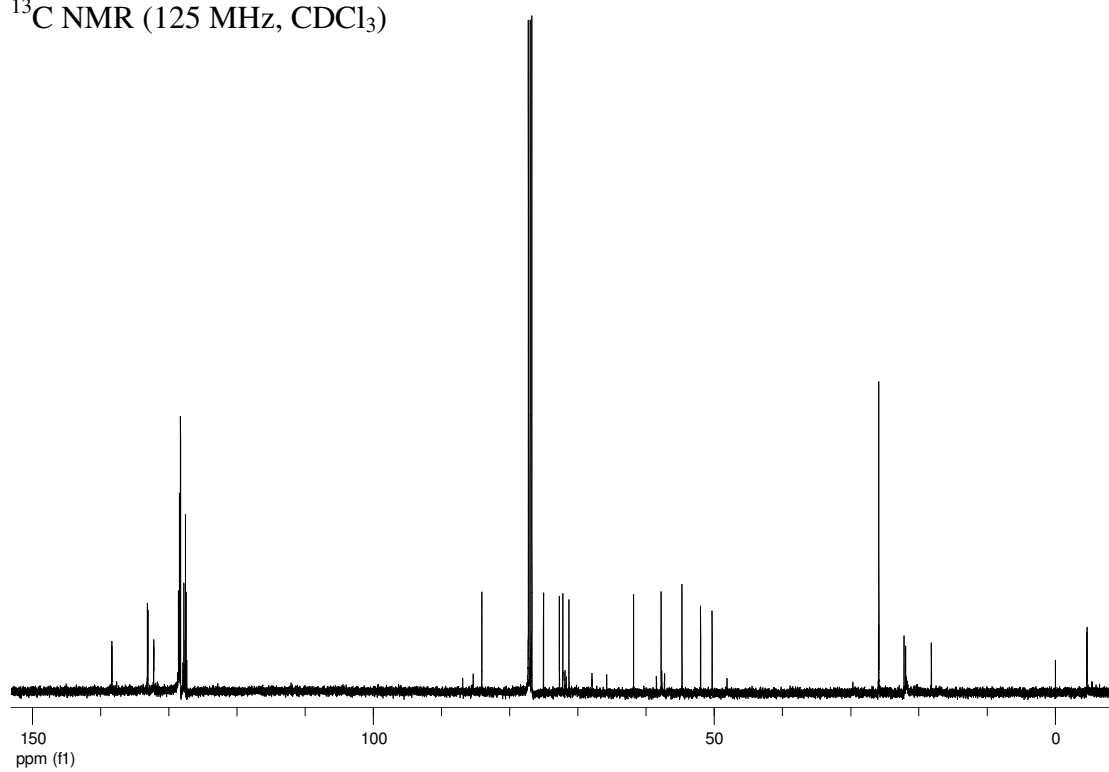

$^1\text{H}$  NMR (500 MHz,  $\text{CDCl}_3$ )

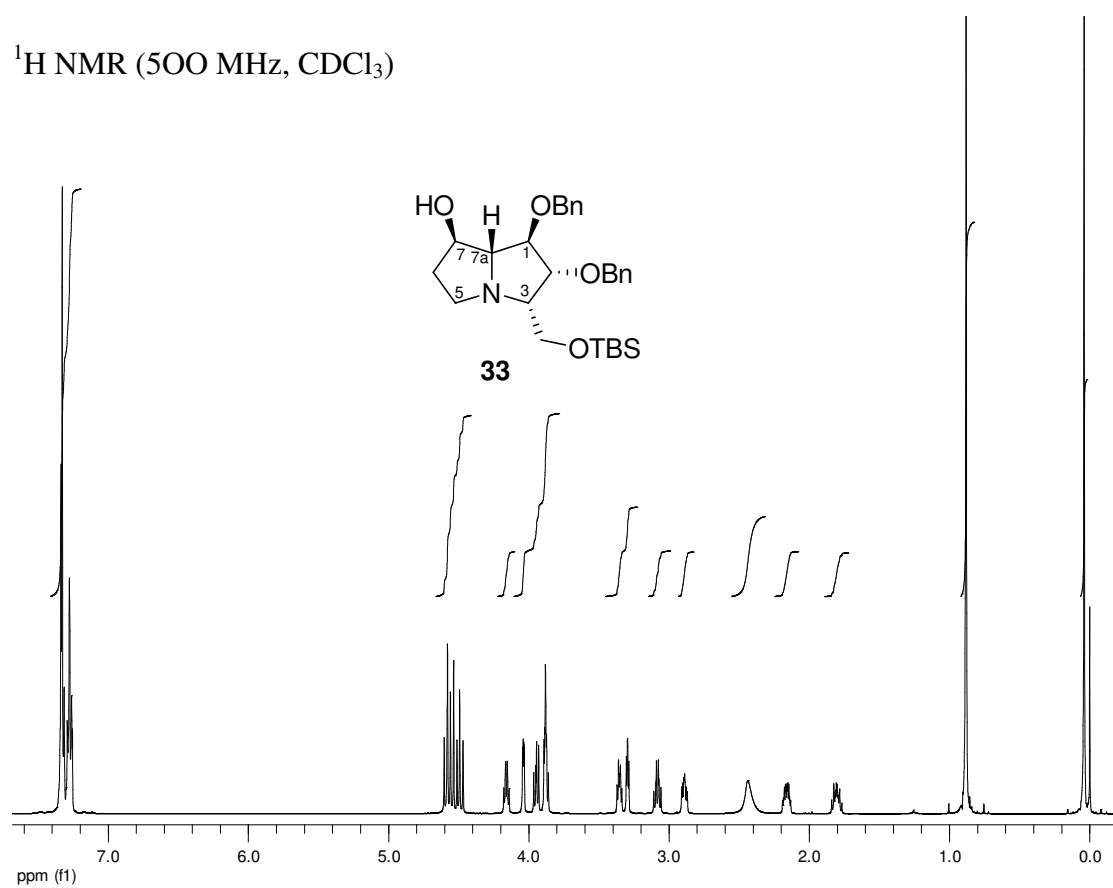

$^{13}\text{C}$  NMR (125 MHz,  $\text{CDCl}_3$ )

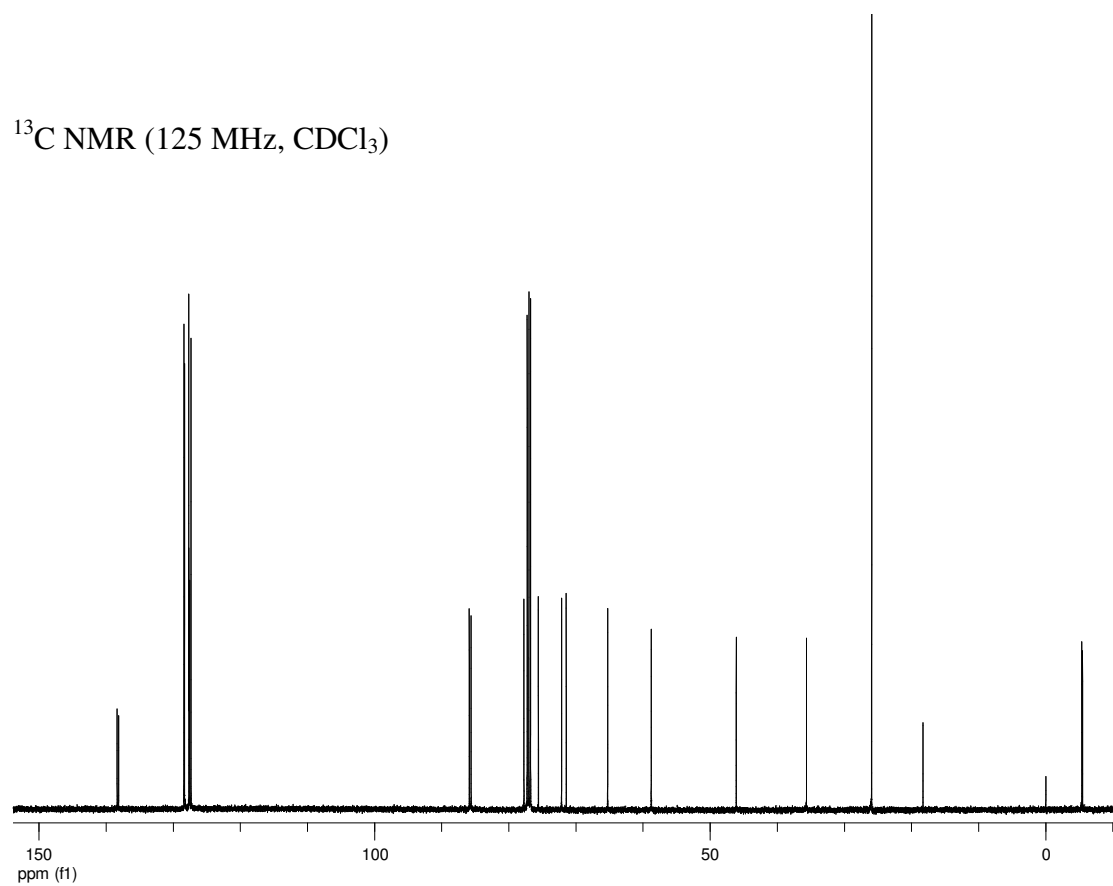

$^1\text{H}$  NMR (500 MHz,  $\text{CDCl}_3$ )

34

$^1\text{H}$  NMR (500 MHz,  $\text{CDCl}_3$ )

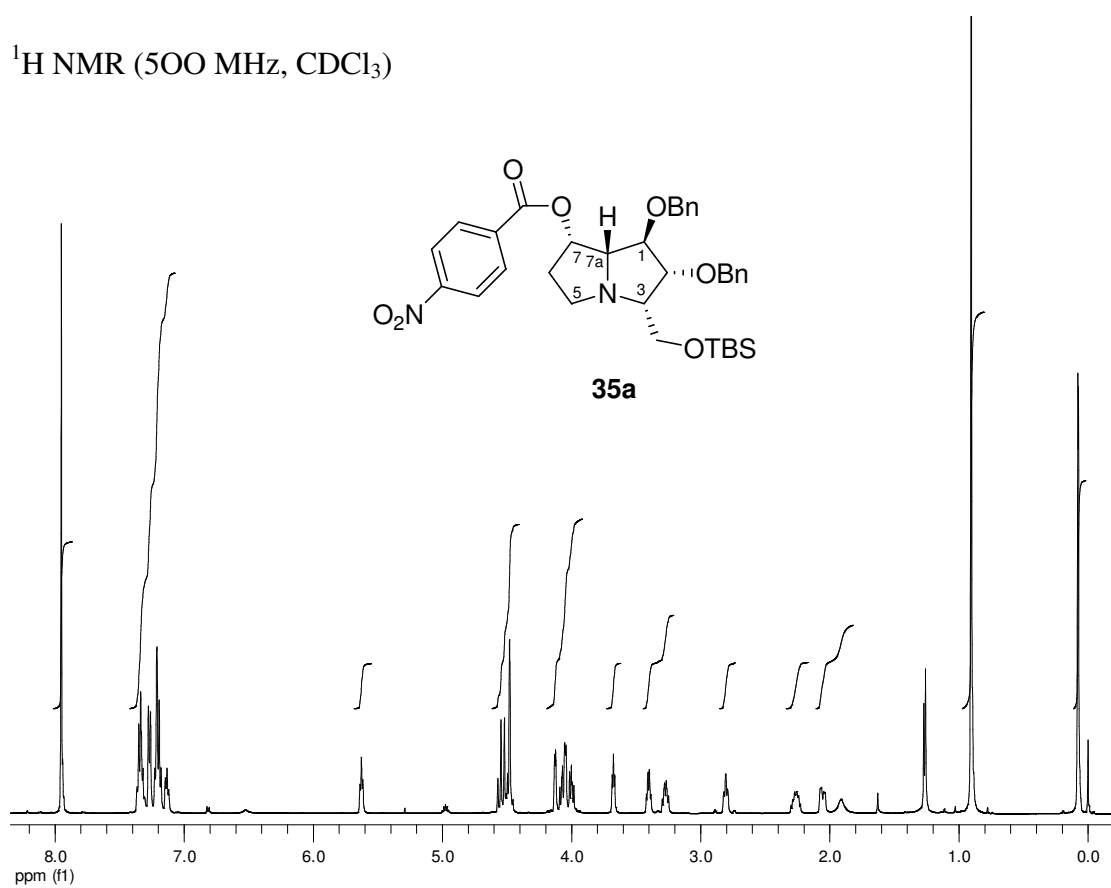

$^{13}\text{C}$  NMR (125 MHz,  $\text{CDCl}_3$ )

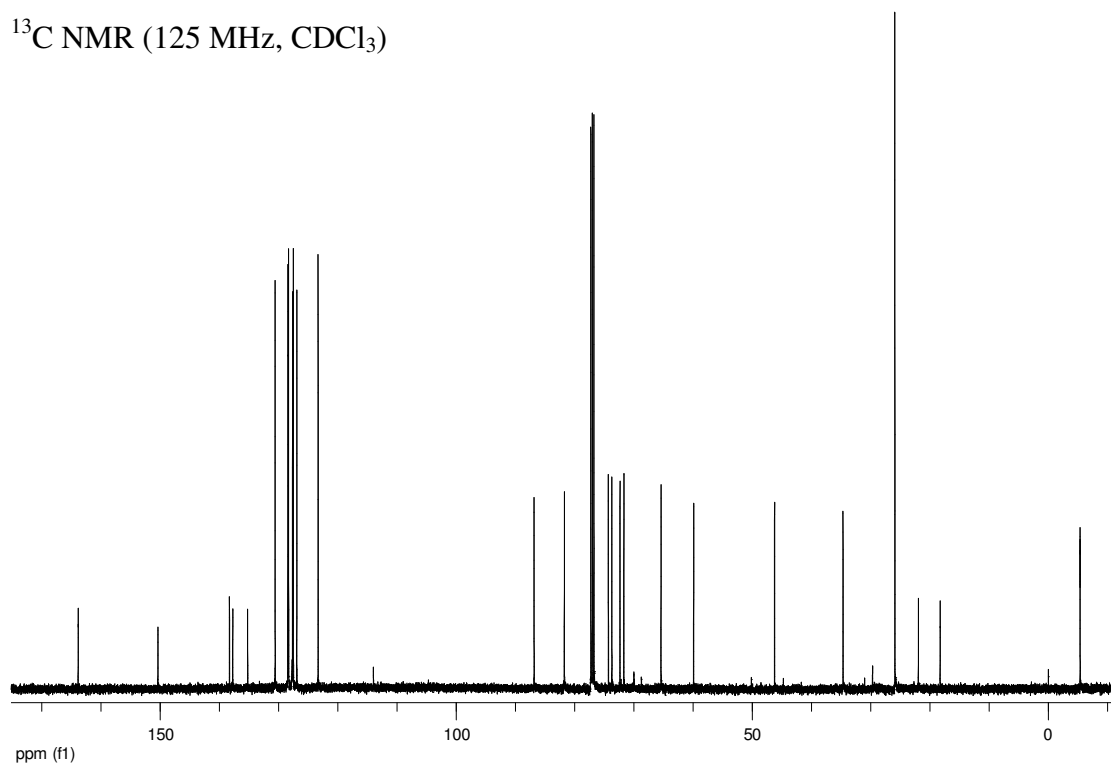

$^1\text{H}$  NMR (500 MHz,  $\text{CDCl}_3$ )

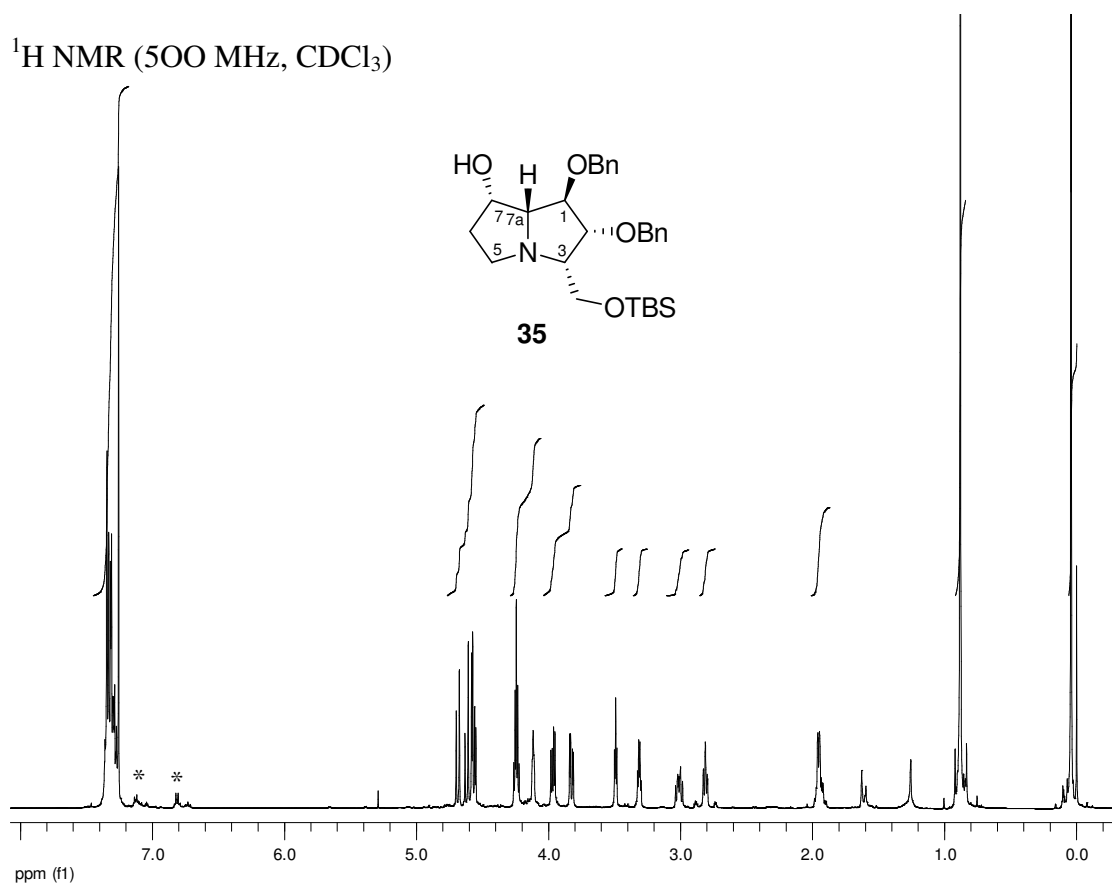

\* Impurity

$^{13}\text{C}$  NMR (125 MHz,  $\text{CDCl}_3$ )

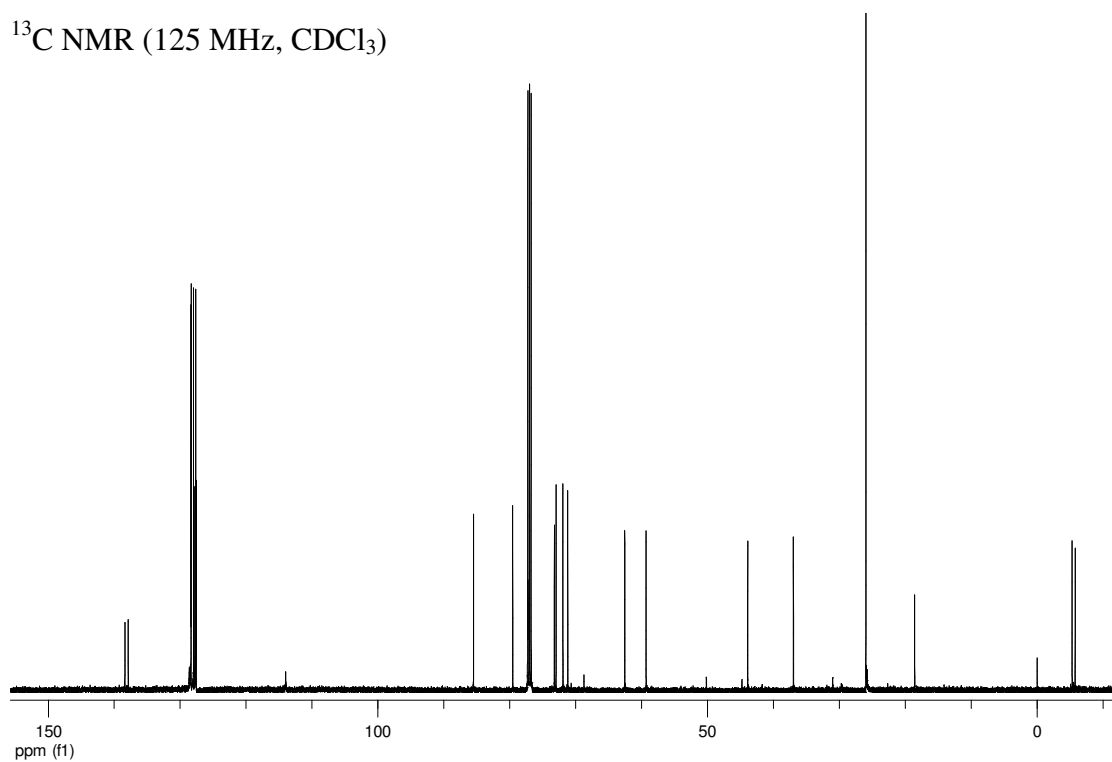

$^1\text{H}$  NMR (500 MHz,  $\text{D}_2\text{O}$ )

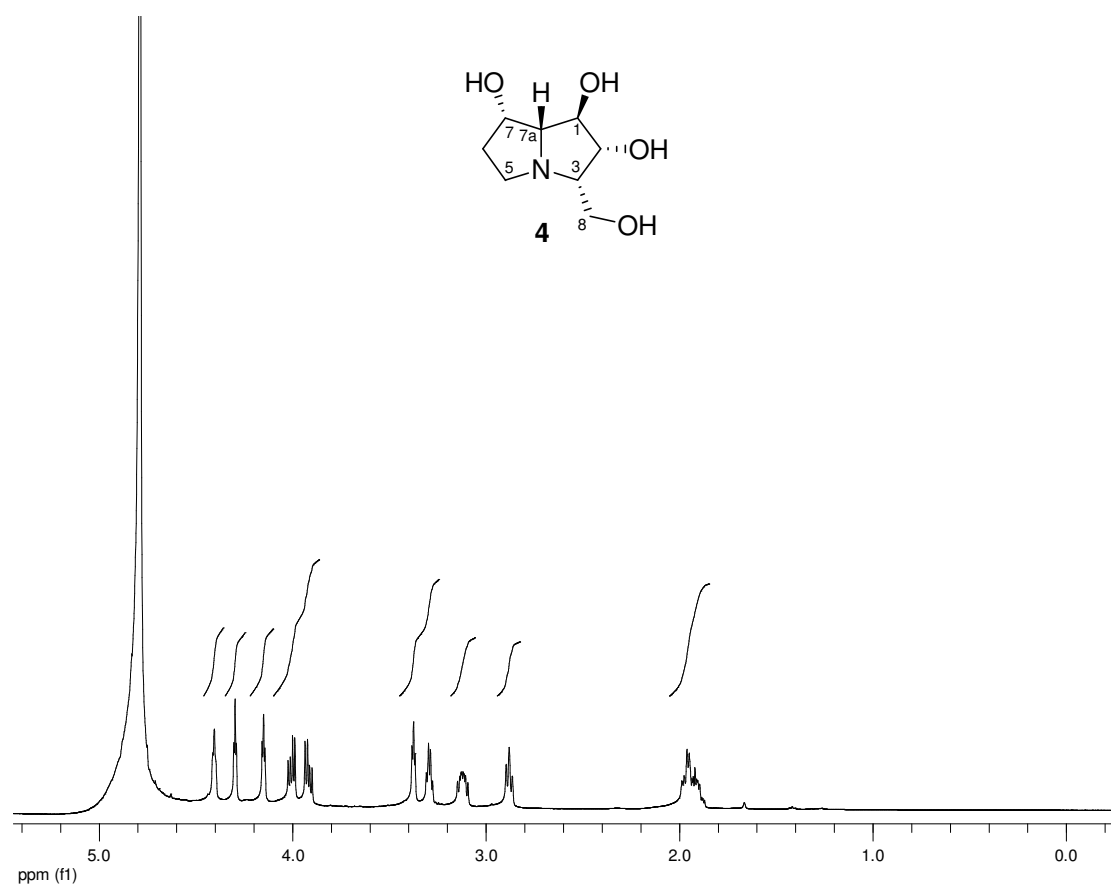

$^{13}\text{C}$  NMR (125 MHz,  $\text{D}_2\text{O}$ )

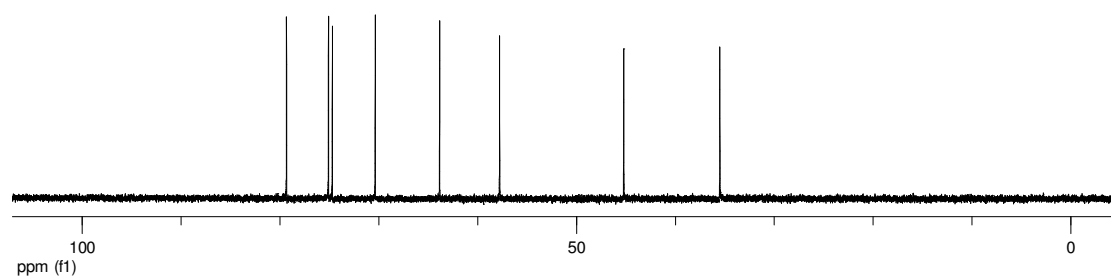

tr090522\_Rtr137

exp1 s2pul

| SAMPLE              |                | SPECIAL |          |
|---------------------|----------------|---------|----------|
| date                | May 22 2009    | temp    | 25.0     |
| solvent             | D2O            | gain    | not used |
| file                | /nmrdata/pyne~ | spin    | not used |
| /fids/Archive/bup~  |                | hst     | 0.008    |
| 090617/thunwadee/t~ |                | pw90    | 5.400    |
| r090522_Rtr137.fid  |                | alfa    | 6.600    |

  

| ACQUISITION |        | FLAGS |          |
|-------------|--------|-------|----------|
| sw          | 7998.4 | il    | n        |
| at          | 1.892  | in    | n        |
| np          | 30266  | dp    | y        |
| fb          | 4000   | hs    | nn       |
| bs          | 4      |       |          |
| d1          | 1.000  | lb    | 0.50     |
| nt          | 64     | fn    | not used |
| ct          | 64     |       |          |

  

| TRANSMITTER |         | PROCESSING |        |
|-------------|---------|------------|--------|
| tn          | H1      | sp         | 866.6  |
| sfrq        | 499.915 | wp         | 1434.4 |
| tof         | 499.8   | rfl        | 3322.3 |
| tpwr        | 60      | rfp        | 2399.6 |
| pw          | 2.700   | rp         | 146.2  |
|             |         | lp         | -35.7  |

  

| DECOUPLER |       | PLOT |        |
|-----------|-------|------|--------|
| dn        | C13   | wc   | 250    |
| dof       | 0     | sc   | 0      |
| dm        | nnn   | vs   | 477    |
| dmm       | c     | th   | 1      |
| dpwr      | 47    | ai   | cdc ph |
| dmf       | 32258 |      |        |

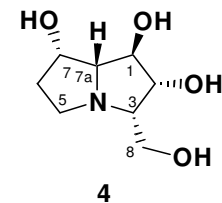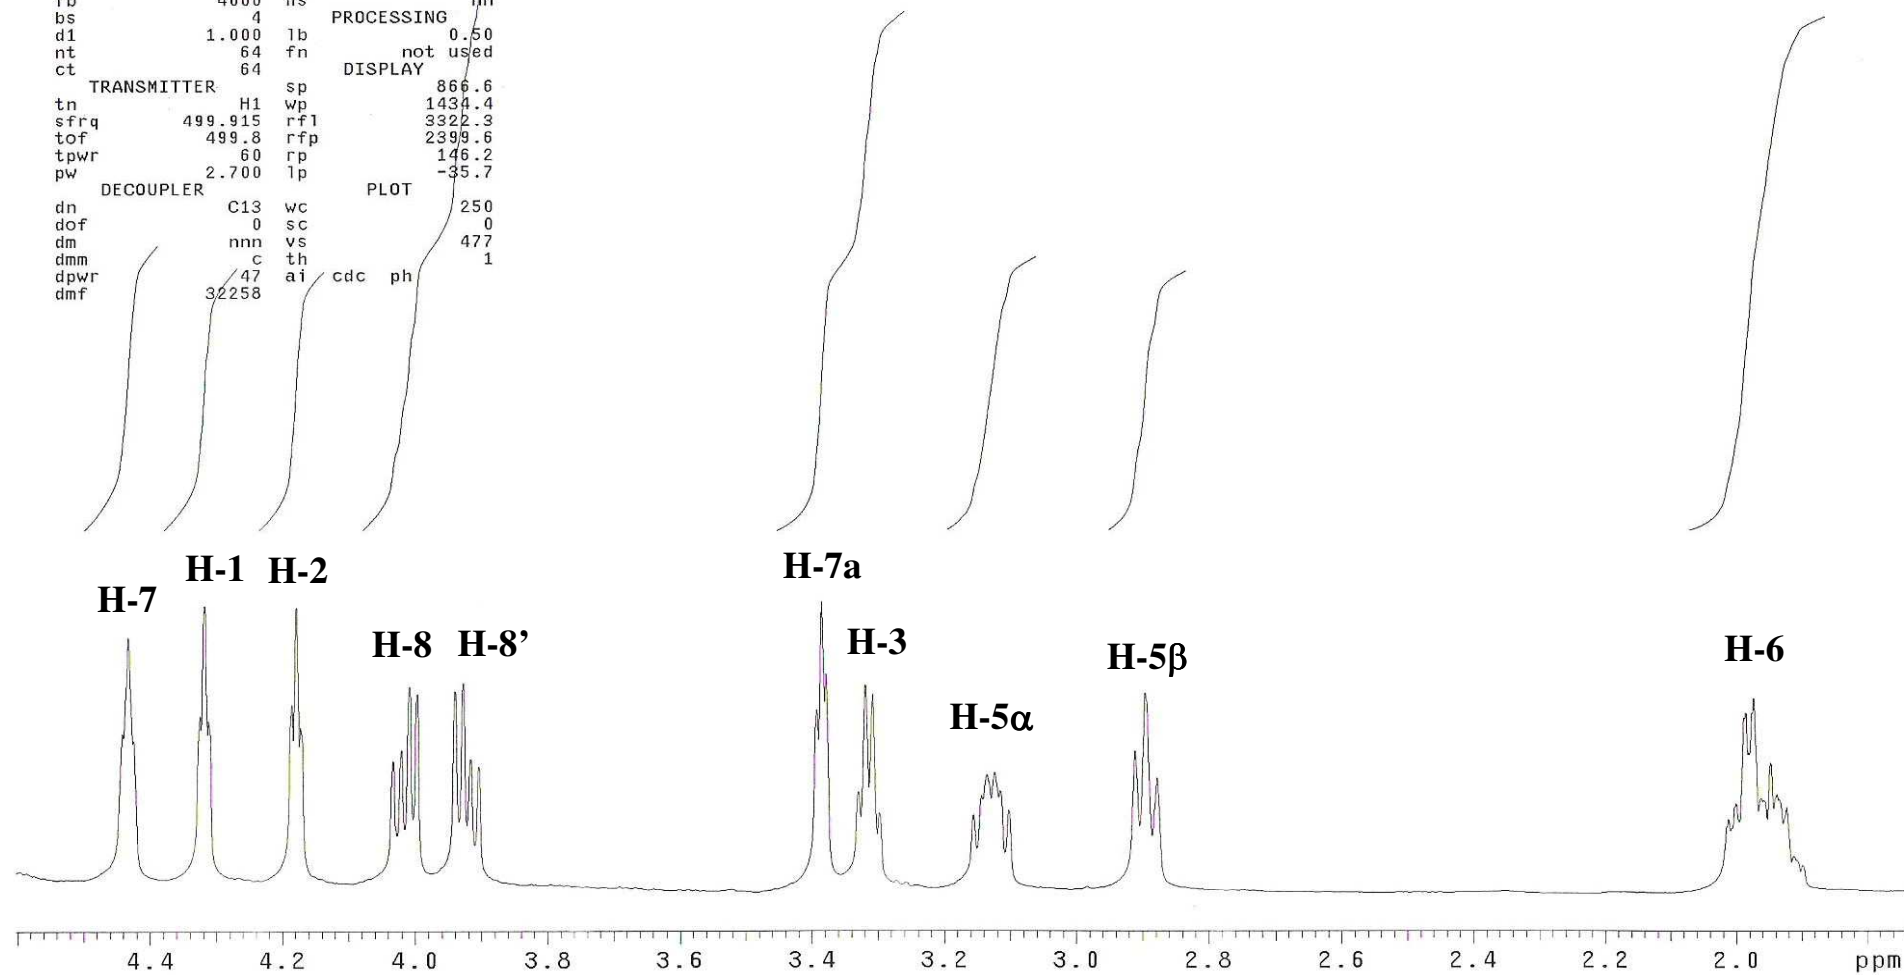

<sup>1</sup>H NMR (500 MHz, D<sub>2</sub>O)

SI- 84 -



tr090522\_Rtr137-13C

exp1 s2pu1

SAMPLE  $D_2O$  SPECIAL  
date May 22 2009 temp 25.0  
solvent  $CDCl_3$  gain not used  
file /nmrdata/pyne~ spin not used  
/fids/Archive/bup~ hst 0.008  
090617/thunwadee/t~ pw90 15.800  
r090522\_Rtr137-13C~ alfa 6.600  
.fid  
ACQUISITION il n  
sw 31421.8 in n  
at 1.300 dp y  
np 81726 hs nn  
fb 17000  
bs 64 lb 0.50  
d1 1.000 fn not used  
nt 12468  
ct 12468 sp 2433.0  
TRANSMITTER wp 8794.4  
tn C13 rfl 6619.5  
sfrq 125.716 rfp 4469.7  
tof 1884.0 rp 150.4  
tpwr 63 lp -169.3  
pw 7.900  
DECOUPLER wc 250  
dn H1 sc 0  
dof 0 vs 1359  
dm YYY th 13  
dmm w ai cdc ph  
dpwr 37  
dmf 12821

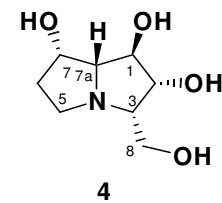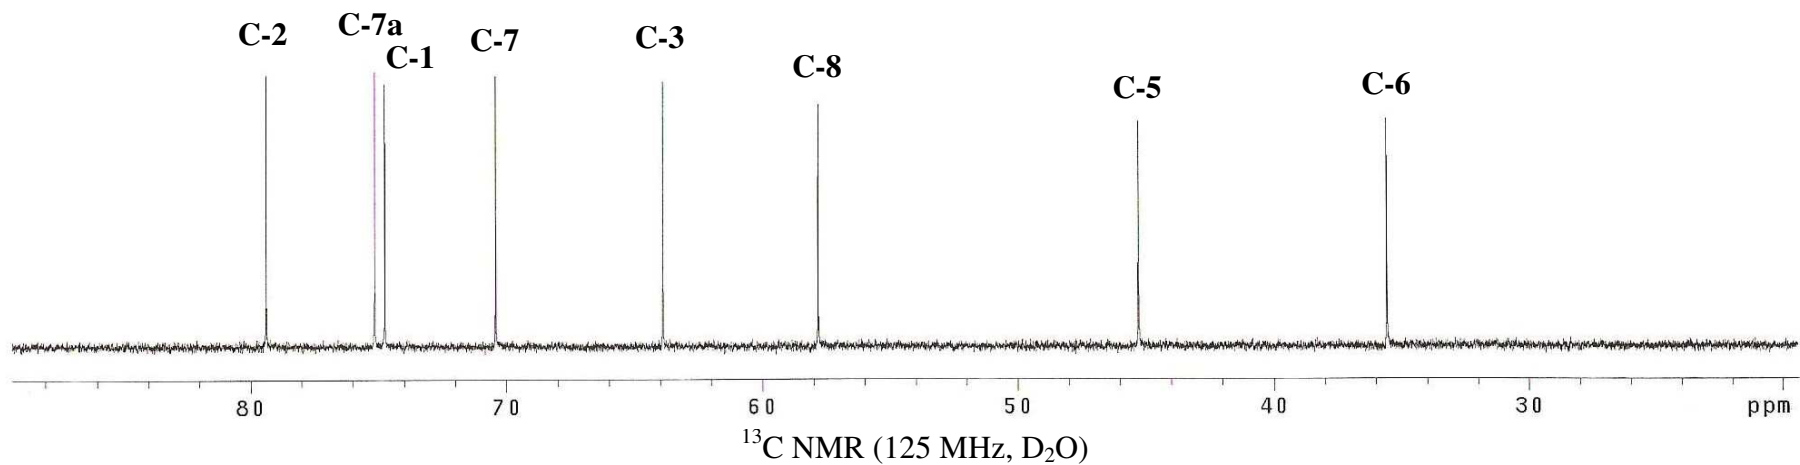

$^1\text{H}$  NMR (500 MHz,  $\text{D}_2\text{O}$ )

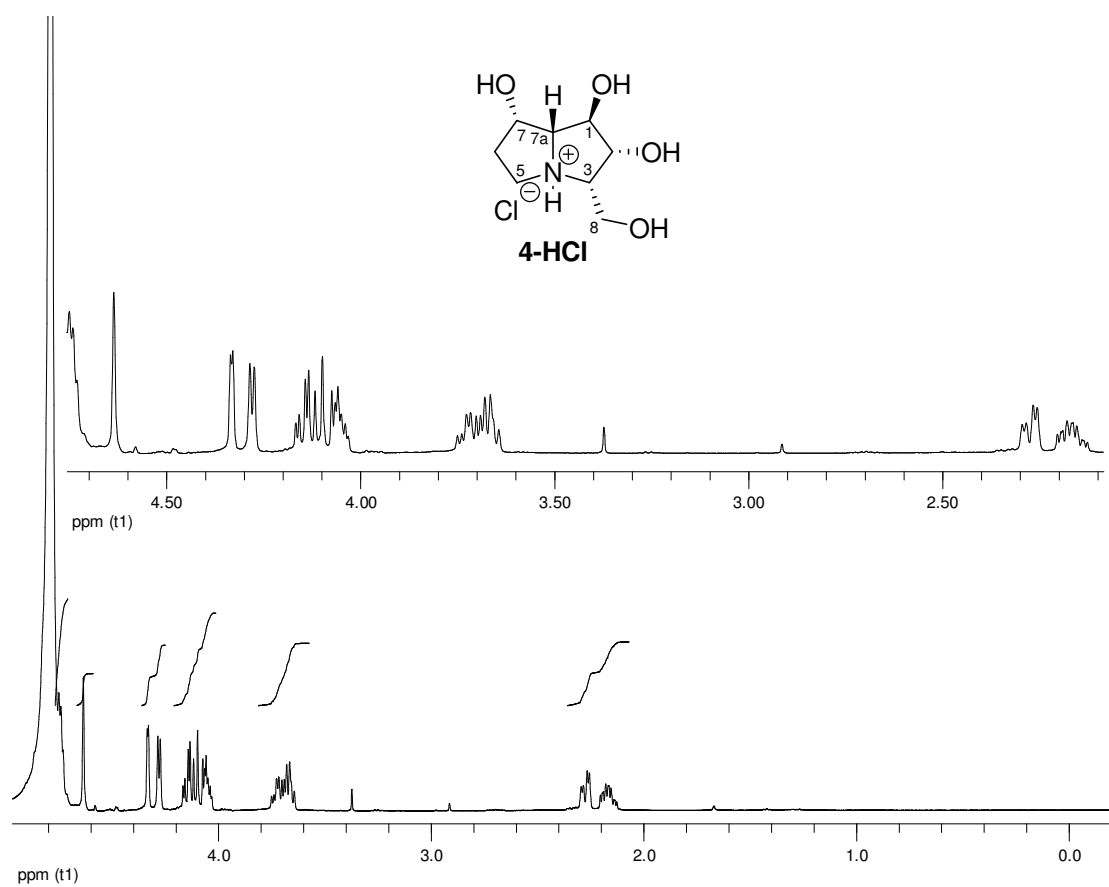

$^{13}\text{C}$  NMR (125 MHz,  $\text{D}_2\text{O}$ )

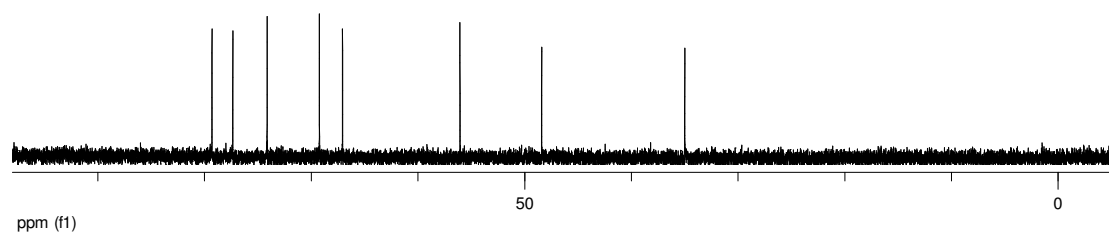

$^1\text{H}$  NMR (500 MHz,  $\text{D}_2\text{O}$ )

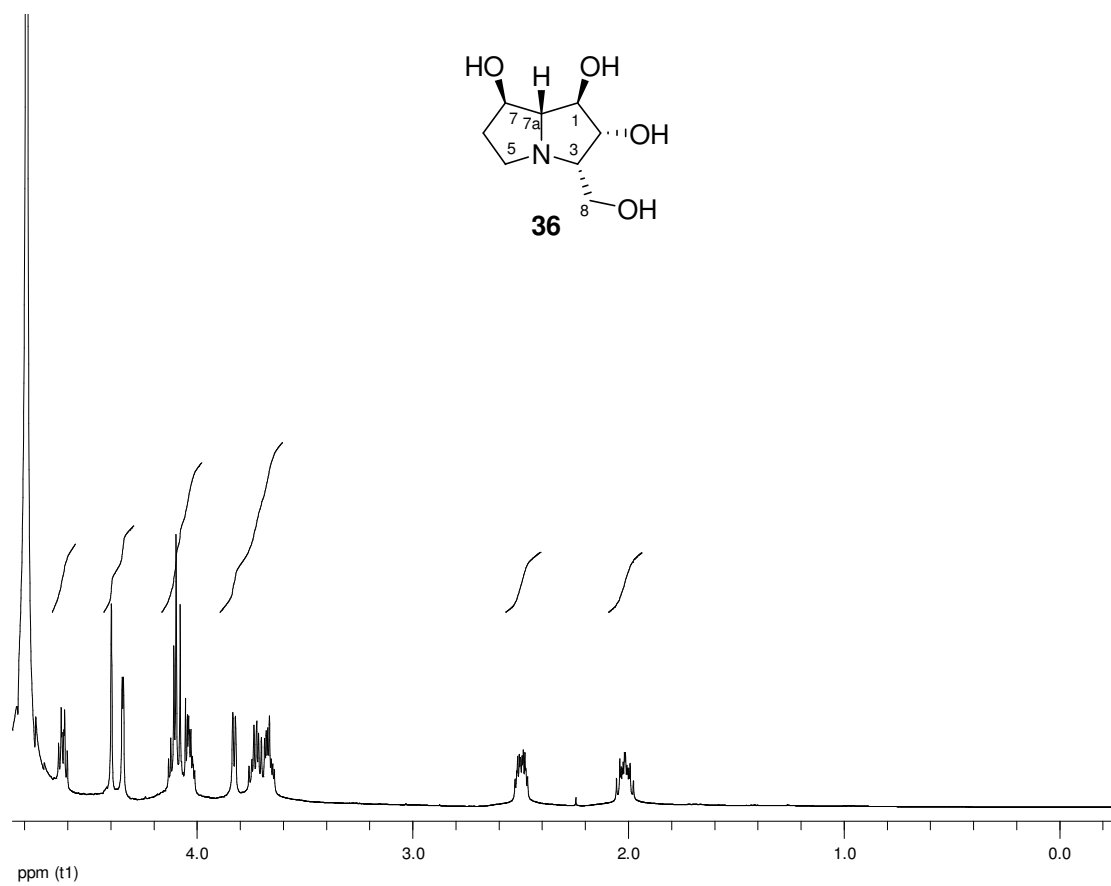

$^{13}\text{C}$  NMR (125 MHz,  $\text{D}_2\text{O}$ )

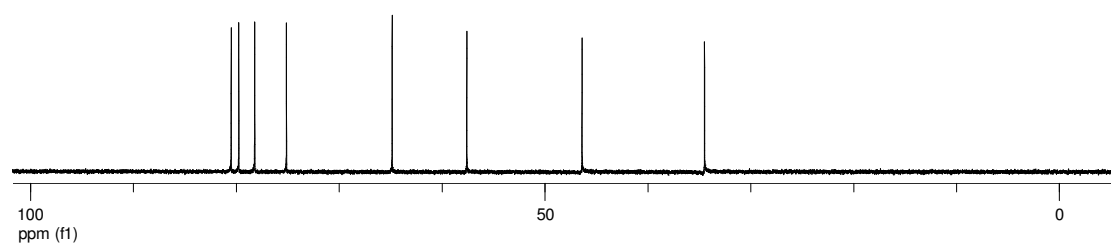

tr090523\_Rtr139

exp1 s2pu1

| SAMPLE              |                | SPECIAL |          |
|---------------------|----------------|---------|----------|
| date                | May 23 2009    | temp    | 25.0     |
| solvent             | D2O            | gain    | not used |
| file                | /nmrdata/pyne~ | spin    | not used |
| /fids/Archive/bup~  |                | hst     | 0.008    |
| 090617/thunwadee/t~ |                | pw90    | 5.400    |
| r090523_Rtr139.fid  |                | alfa    | 6.600    |

| ACQUISITION |        | FLAGS |    |
|-------------|--------|-------|----|
| sw          | 7998.4 | il    | n  |
| at          | 1.892  | in    | n  |
| np          | 30266  | dp    | y  |
| fb          | 4000   | hs    | nn |

| PROCESSING |       |
|------------|-------|
| d1         | 1.000 |
| nt         | 64    |
| ct         | 64    |

| TRANSMITTER |         | DISPLAY |        |
|-------------|---------|---------|--------|
| tn          | H1      | sp      | 751.9  |
| sfrq        | 499.915 | wp      | 1496.4 |
| tof         | 499.8   | rfl     | 3322.8 |
| tpwr        | 50      | rfp     | 2399.6 |
| pw          | 2.700   | rp      | 141.2  |
|             |         | lp      | -24.8  |

| DECOUPLER |       | PLOT |        |
|-----------|-------|------|--------|
| dn        | C13   | wc   | 250    |
| dof       | 0     | sc   | 0      |
| dm        | nmn   | vs   | 371    |
| dmm       | c     | th   | 2      |
| dpwr      | 47    | ai   | cdc ph |
| dmf       | 32258 |      |        |

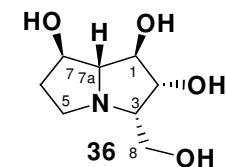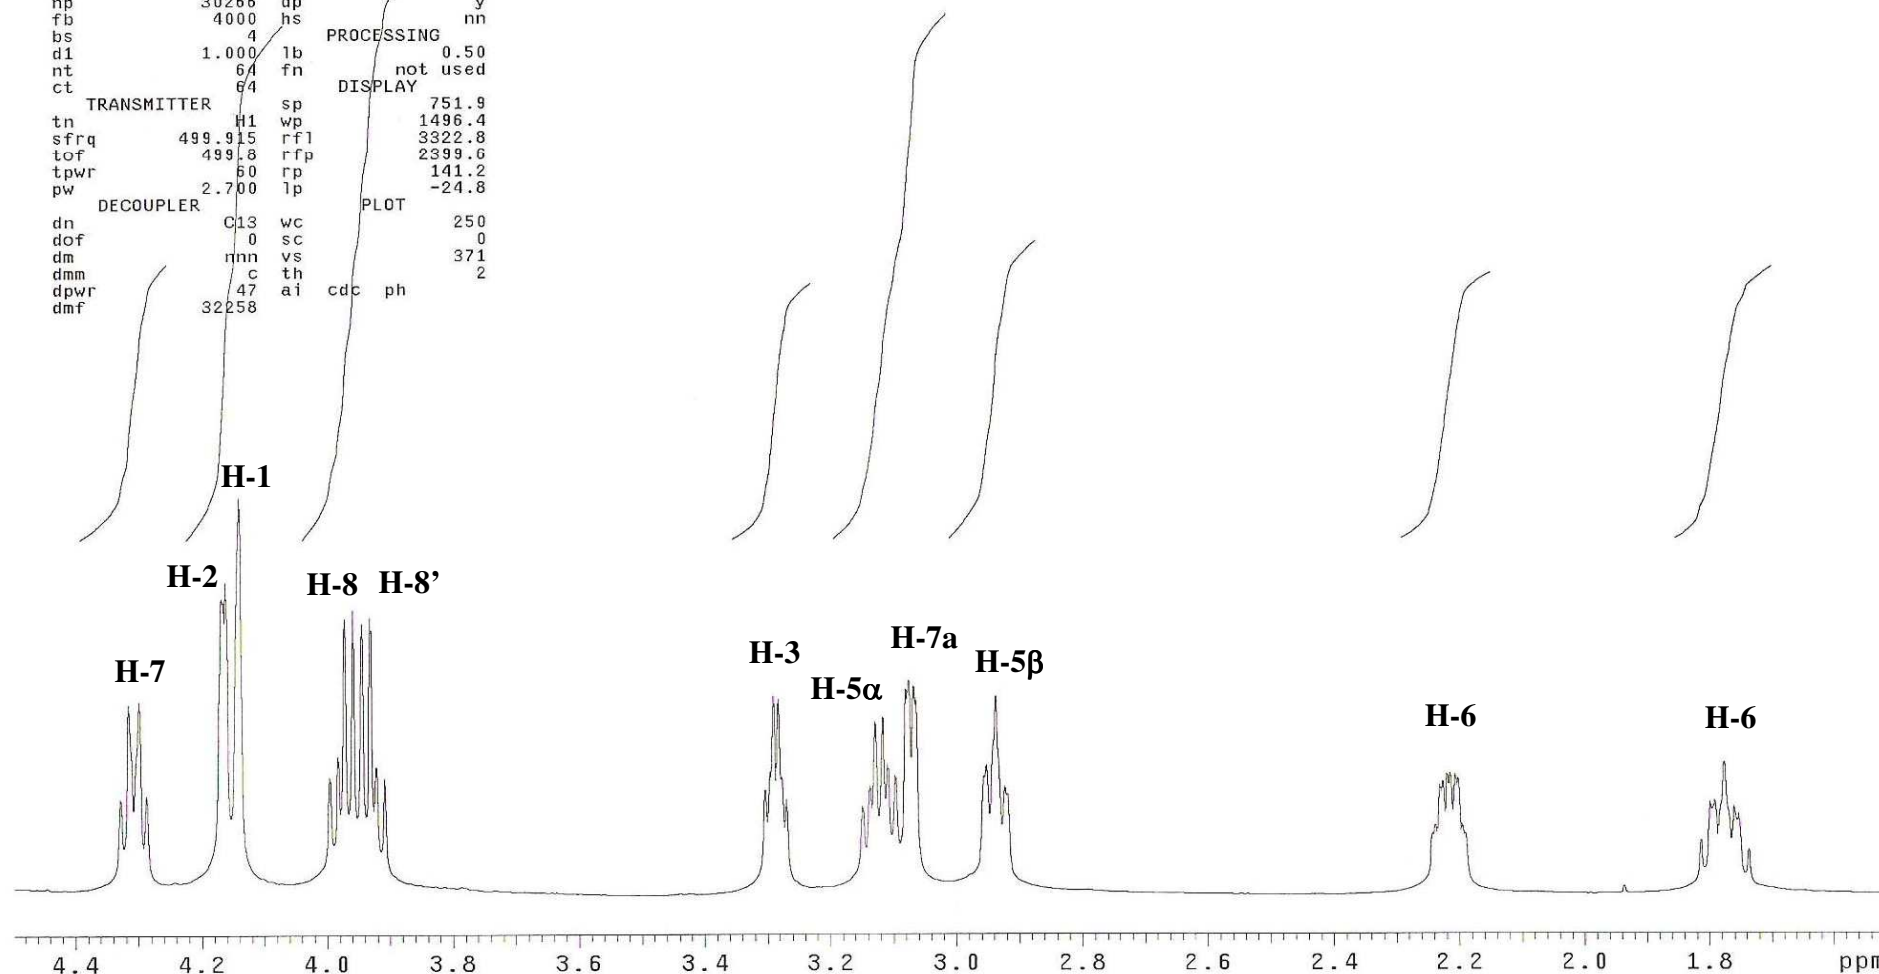

$^1\text{H}$  NMR (500 MHz,  $\text{D}_2\text{O}$ )

SI- 88 -

tr090523\_Rtr139-13C

exp1 s2pu1

SAMPLE *D<sub>2</sub>O* SPECIAL  
date May 23 2009 temp 25.0  
solvent CDCl<sub>3</sub> gain not used  
file /nmrdata/pyne~ spin not used  
/fids/Archive/bup~ hst 0.008  
090617/thunwadee/t~ pw90 15.800  
r090523\_Rtr139-13C~ alfa 6.600  
-fid  
ACQUISITION i1 n  
sw 31421.8 in n  
at 1.300 dp y  
np 81726 hs nn  
fb 17000  
bs 64 lb PROCESSING 0.50  
dl 1.000 fn not used  
nt 11688 DISPLAY  
ct 11688 sp 2432.5  
TRANSMITTER wp 9001.0  
tn C13 rfl 6486.7  
sfrq 125.716 rfp 4336.5  
tof 1884.0 rp 160.5  
lpwr 63 lp -199.6  
pw 7.900 PLOT  
DECOUPLER wc 250  
dn H1 sc 0  
dof 0 vs 846  
dm yyy th 8  
dmm w ai cdc ph  
dpwr 37  
dmf 12821

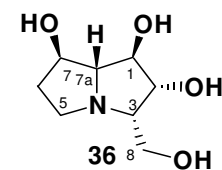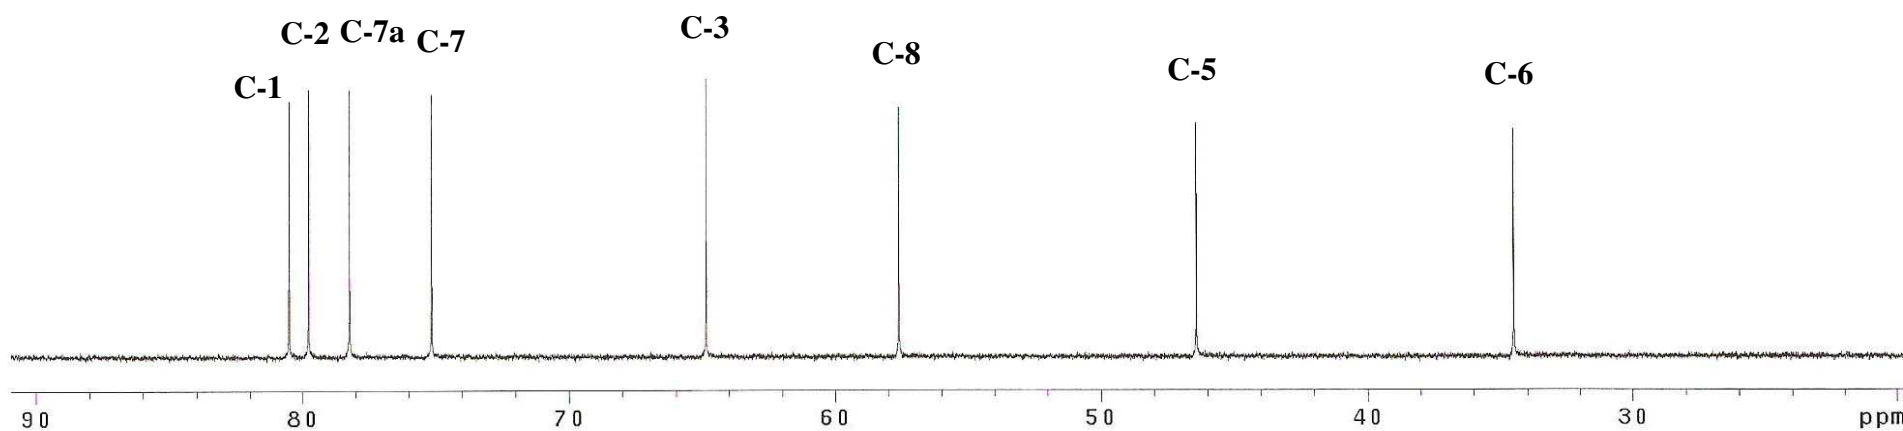

<sup>13</sup>C NMR (125 MHz, D<sub>2</sub>O)

SI- 89 -

$^1\text{H}$  NMR (500 MHz,  $\text{D}_2\text{O}$ )

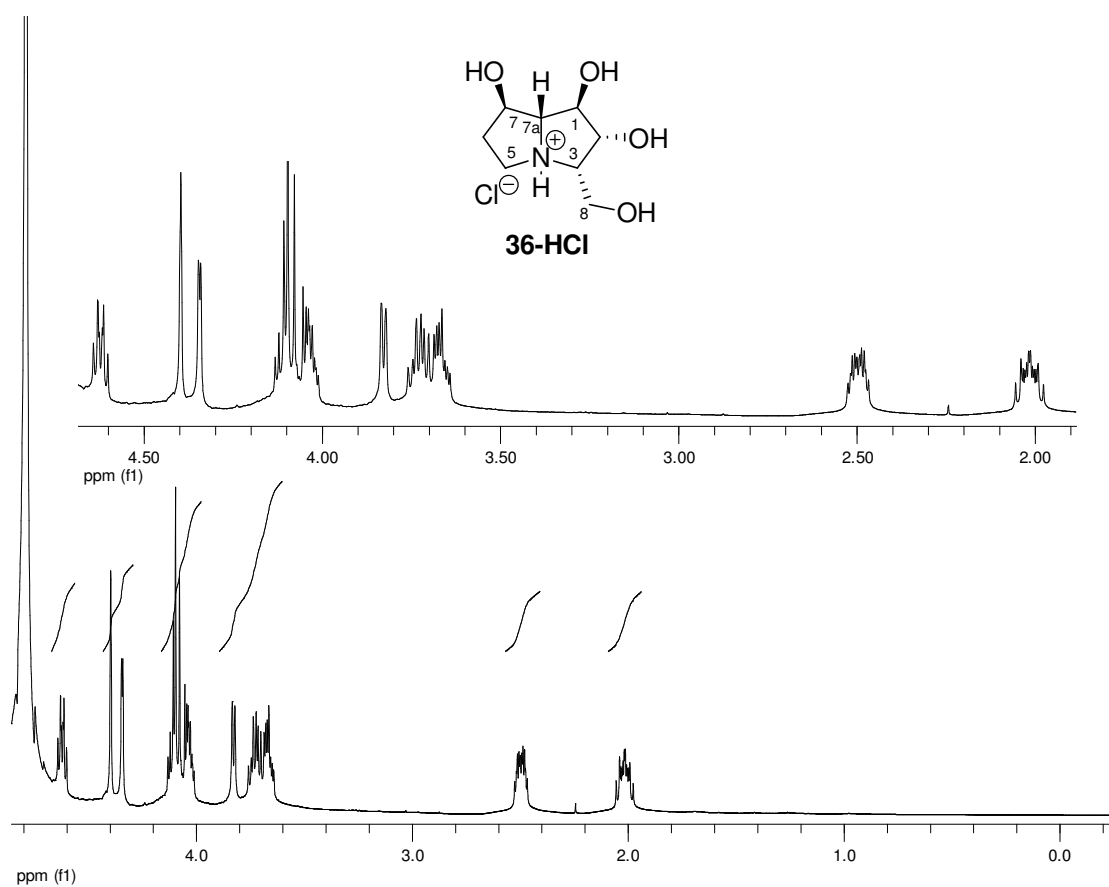

$^{13}\text{C}$  NMR (125 MHz,  $\text{D}_2\text{O}$ )

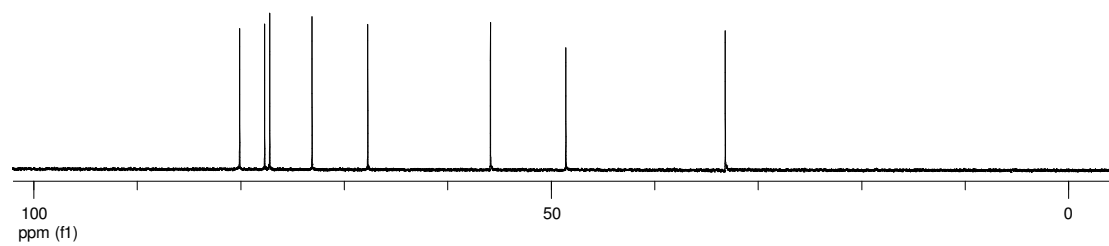

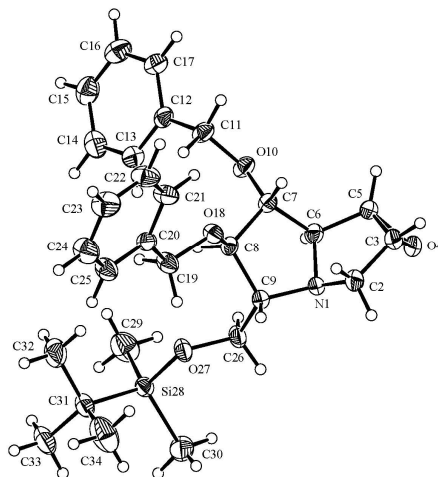

**Figure** Structure of  $\text{C}_{28}\text{H}_{39}\text{NO}_4\text{Si}$  **21** with labelling of selected atoms. Anisotropic displacement ellipsoids show 30% probability levels. Hydrogen atoms are drawn as circles with small radii.

Crystal/refinement data have been deposited with the Cambridge Crystallographic Data Centre (CCDC 752850).
